# Supplementary material
Source: publisher figshare collection journal article supplement (https://acs.figshare.com/ndownloader/files/3860470)
Supplement: Supplementary file 1 [file 3860470]

**N-Heterocyclic Carbene Catalyzed Switchable Reactions of enals with Azoalkenes:  
Formal [4+3] and [4+1] Annulations for the synthesis of 1,2-Diazepines and  
Pyrazoles**

Chang Guo, Basudev Sahoo, Constantin G. Daniliuc, Frank Glorius\*

Organisch-Chemisches Institut, Westfälische Wilhelms-Universität Münster, Corrensstraße 40,  
48149 Münster, Germany

glorius@uni-muenster.de

**CONTENTS:**

|                                              |     |
|----------------------------------------------|-----|
| 1 General information                        | S2  |
| 2 Synthesis of Substrates                    | S3  |
| 3 Synthesis and Characterization of Products | S6  |
| 4 X-ray Crystallography data                 | S19 |
| 5 Synthetic Transformation of <b>3ad</b>     | S20 |
| 6 References                                 | S21 |
| 7 NMR spectra                                | S22 |
| 8 HPLC traces                                | S69 |

## 1. General information

Unless otherwise noted, all reactions were carried out under an atmosphere of argon in flame-dried glassware. Reaction temperatures are reported as the temperature of the bath surrounding the vessel unless otherwise stated. The solvents used were purified by distillation over the drying agents indicated in parentheses and were transferred under argon: n-hexane (CaH<sub>2</sub>), THF (Na-benzophenone), toluene (CaH<sub>2</sub>).

Analytical thin layer chromatography was performed on Polygram SIL G/UV254 plates. Flash chromatography was either performed on Merck silica gel (40-63 mesh) by standard technique eluting with solvents as indicated.

<sup>1</sup>H and <sup>13</sup>C-NMR spectra were recorded on a Bruker AV 300 or AV 400, Varian 500 MHz INOVA or Varian Unity plus 600 in solvents as indicate. Chemical shifts (δ) are given in ppm relative to TMS. The residual solvent signals were used as references and the chemical shifts converted to the TMS scale (CDCl<sub>3</sub>: δH = 7.26 ppm, δC = 77.16 ppm). ESI mass spectra were recorded on a Bruker Daltonics MicroTof. Specific rotation was measured on a Perkin Elmer 341 polarimeter at 20 °C using a quartz glass cell (100 mm path length). The enantiomeric ratio (ee) was determined by HPLC analysis using chiral column OD-H and AD-H. No attempts were made to optimize yields for substrate synthesis.

## 2. Synthesis and characterization of $\alpha$ -chloro N-Boc hydrazones.<sup>1</sup>

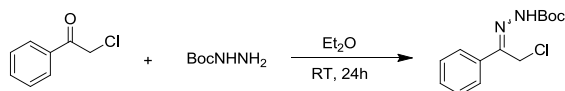

2-Chloroacetophenone (3.08 g, 20 mmol) and tert-Butyl carbazate (2.64 g, 20 mmol) were stirred in ether (50 mL) at RT for 24 h. After this time the product had precipitated as a white solid which was collected and dried to give hydrazone as a white powder.

Other hydrazones were synthesized according to the above procedures.

### tert-butyl 2-(2-chloro-1-phenylethylidene)hydrazinecarboxylate (2d)

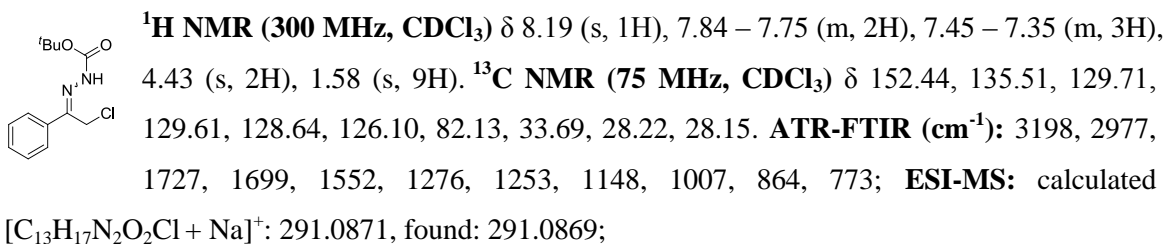

### tert-butyl 2-(2-chloro-1-(p-tolyl)ethylidene)hydrazinecarboxylate (2e)

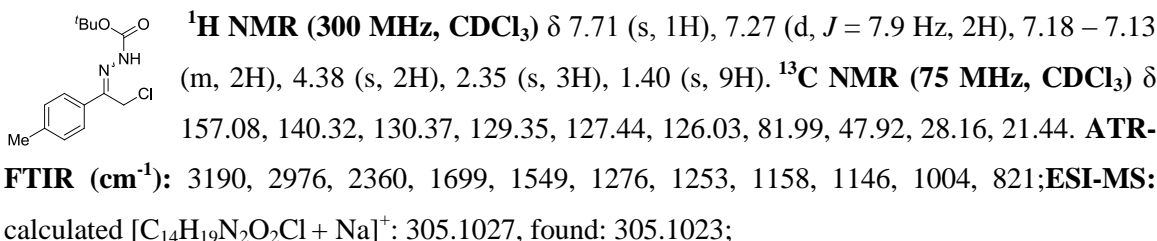

### tert-butyl 2-(2-chloro-1-(4-methoxyphenyl)ethylidene)hydrazinecarboxylate (2f)

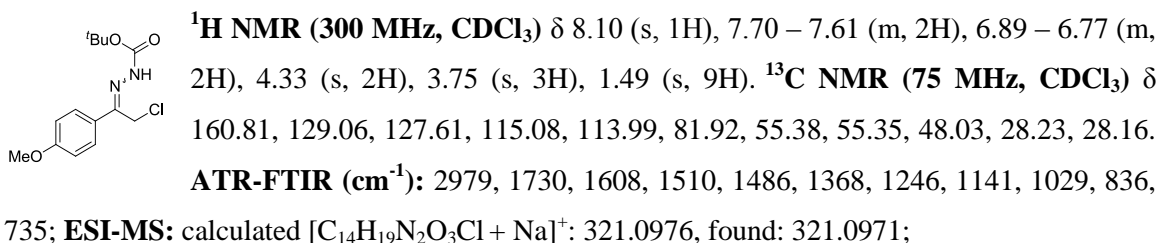

### tert-butyl 2-(2-chloro-1-(4-fluorophenyl)ethylidene)hydrazinecarboxylate (2g)

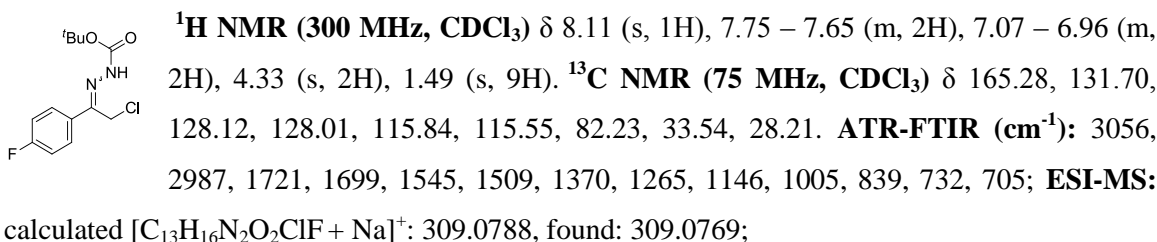

**tert-butyl 2-(2-chloro-1-(4-chlorophenyl)ethylidene)hydrazinecarboxylate (2h)**

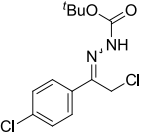  
**<sup>1</sup>H NMR (400 MHz, CDCl<sub>3</sub>)** δ 8.25 (s, 1H), 7.77 – 7.69 (m, 2H), 7.42 – 7.34 (m, 2H), 4.40 (s, 2H), 1.58 (s, 9H). **<sup>13</sup>C NMR (101 MHz, CDCl<sub>3</sub>)** δ 152.24, 135.66, 133.95, 130.10, 129.12, 128.87, 127.37, 82.33, 33.32, 28.21, 28.14. **ATR-FTIR (cm<sup>-1</sup>):** 3179, 2980, 2362, 1699, 1547, 1490, 1368, 1275, 1253, 1149, 1004, 832; **ESI-MS:** calculated [C<sub>13</sub>H<sub>16</sub>N<sub>2</sub>O<sub>2</sub>Cl<sub>2</sub> + Na]<sup>+</sup>: 325.0492, found: 325.0484;

**tert-butyl 2-(1-(4-bromophenyl)-2-chloroethylidene)hydrazinecarboxylate (2i)**

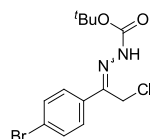  
**<sup>1</sup>H NMR (400 MHz, CDCl<sub>3</sub>)** δ 8.11 (s, 1H), 7.61 – 7.55 (m, 2H), 7.49 – 7.42 (m, 2H), 4.31 (s, 2H), 1.50 (s, 9H). **<sup>13</sup>C NMR (101 MHz, CDCl<sub>3</sub>)** δ 134.38, 131.83, 127.61, 124.02, 82.37, 33.27, 28.20. **ATR-FTIR (cm<sup>-1</sup>):** 3188, 2980, 1724, 1698, 1602, 1546, 1486, 1460, 1275, 1252, 1160, 1148, 1070, 1003, 831; **ESI-MS:** calculated [C<sub>13</sub>H<sub>16</sub>N<sub>2</sub>O<sub>2</sub>BrCl + Na]<sup>+</sup>: 370.9966, found: 370.9935;

**tert-butyl 2-(2-chloro-1-(4-(trifluoromethyl)phenyl)ethylidene)hydrazinecarboxylate (2j)**

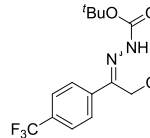  
**<sup>1</sup>H NMR (400 MHz, CDCl<sub>3</sub>)** δ 8.29 (s, 1H), 7.82 (d, *J* = 8.2 Hz, 2H), 7.57 (d, *J* = 8.3 Hz, 2H), 4.37 (s, 2H), 1.50 (s, 9H). **<sup>13</sup>C NMR (101 MHz, CDCl<sub>3</sub>)** δ 151.78, 128.33, 126.78, 126.74, 126.35, 125.62, 125.58, 82.53, 47.46, 28.18, 28.11. **ATR-FTIR (cm<sup>-1</sup>):** 3166, 2363, 1698, 1684, 1598, 1457, 1380, 1327, 1144, 1113, 1065, 1004, 849; **ESI-MS:** calculated [C<sub>14</sub>H<sub>16</sub>N<sub>2</sub>O<sub>2</sub>ClF<sub>3</sub> + Na]<sup>+</sup>: 359.0756, found: 359.0742;

**tert-butyl 2-(2-chloro-1-(naphthalen-2-yl)ethylidene)hydrazinecarboxylate (2k)**

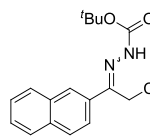  
**<sup>1</sup>H NMR (300 MHz, CDCl<sub>3</sub>)** δ 8.33 (s, 1H), 8.14 – 8.03 (m, 2H), 7.86 (dt, *J* = 9.4, 5.5 Hz, 3H), 7.57 – 7.45 (m, 2H), 4.55 (s, 2H), 1.60 (s, 9H). **<sup>13</sup>C NMR (75 MHz, CDCl<sub>3</sub>)** δ 152.39, 133.82, 133.00, 132.83, 128.57, 128.51, 127.70, 126.97, 126.52, 125.69, 123.51, 82.21, 33.46, 28.26, 28.15. **ATR-FTIR (cm<sup>-1</sup>):** 3174, 2981, 1731, 1698, 1552, 1465, 1253, 1154, 1077, 1013, 943, 815; **ESI-MS:** calculated [C<sub>17</sub>H<sub>19</sub>N<sub>2</sub>O<sub>2</sub>Cl + Na]<sup>+</sup>: 341.1038, found: 341.1027;

**tert-butyl 2-(1-(3-bromophenyl)-2-chloroethylidene)hydrazinecarboxylate (2l)**

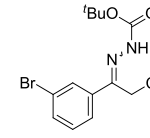  
**<sup>1</sup>H NMR (300 MHz, CDCl<sub>3</sub>)** δ 8.61 (s, 1H), 7.94 – 7.87 (m, 1H), 7.63 (ddd, *J* = 5.7, 3.7, 2.0 Hz, 1H), 7.50 – 7.41 (m, 1H), 7.21 (ddd, *J* = 6.8, 4.3, 2.9 Hz, 1H), 4.41 (s, 2H), 1.54 (s, 9H). **<sup>13</sup>C NMR (75 MHz, CDCl<sub>3</sub>)** δ 152.78, 137.61, 132.36, 130.09, 129.03, 124.63, 122.86, 95.15, 82.32, 47.58, 28.22. **ATR-FTIR (cm<sup>-1</sup>):** 3194, 2982, 1730,

1700, 1549, 1473, 1369, 1280, 1250, 1146, 1013, 782; **ESI-MS**: calculated  $[\text{C}_{13}\text{H}_{16}\text{N}_2\text{O}_2\text{BrCl} + \text{Na}]^+$ : 370.9966, found: 370.9948;

**tert-butyl 2-(2-chloro-1-(m-tolyl)ethylidene)hydrazinecarboxylate (2m)**

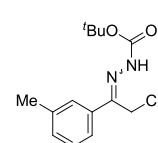  **$^1\text{H}$  NMR (300 MHz,  $\text{CDCl}_3$ )**  $\delta$  7.76 (s, 1H), 7.42 – 7.33 (m, 1H), 7.22 (d,  $J$  = 7.8 Hz, 1H), 7.06 (d,  $J$  = 5.5 Hz, 2H), 4.40 (s, 2H), 2.37 (s, 3H), 1.44 (s, 9H).  **$^{13}\text{C}$  NMR (75 MHz,  $\text{CDCl}_3$ )**  $\delta$  152.13, 139.64, 135.48, 130.93, 129.55, 127.83, 124.54, 81.80, 47.84, 28.13, 21.49. **ATR-FTIR ( $\text{cm}^{-1}$ )**: 2980, 1745, 1486, 1368, 1238, 1153, 1105, 1019, 854, 713; **ESI-MS**: calculated  $[\text{C}_{14}\text{H}_{19}\text{N}_2\text{O}_2\text{Cl} + \text{Na}]^+$ : 305.1038, found: 305.1022;

**tert-butyl 2-(1-chloro-3,3-dimethylbutan-2-ylidene)hydrazinecarboxylate (2n)**

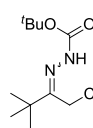  **$^1\text{H}$  NMR (400 MHz,  $\text{CDCl}_3$ )**  $\delta$  7.99 (s, 1H), 4.04 (s, 2H), 1.53 (s, 9H), 1.21 (s, 9H).  **$^{13}\text{C}$  NMR (101 MHz,  $\text{CDCl}_3$ )**  $\delta$  152.61, 81.43, 38.59, 32.86, 28.27, 27.51. **ATR-FTIR ( $\text{cm}^{-1}$ )**: 3206, 2977, 2364, 1701, 1551, 1367, 1276, 1252, 1150, 1019, 875; **ESI-MS**: calculated  $[\text{C}_{11}\text{H}_{21}\text{N}_2\text{O}_2\text{Cl} + \text{Na}]^+$ : 271.1184, found: 271.1182;

**tert-butyl 2-(2-chloro-3,4-dihydronaphthalen-1(2H)-ylidene)hydrazinecarboxylate (2o)**

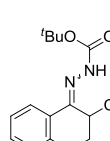  **$^1\text{H}$  NMR (400 MHz,  $\text{CDCl}_3$ )**  $\delta$  8.16 (d,  $J$  = 5.8 Hz, 2H), 7.24 – 7.13 (m, 2H), 7.08 (dd,  $J$  = 8.3, 7.6 Hz, 1H), 4.97 (t,  $J$  = 3.4 Hz, 1H), 3.17 (ddd,  $J$  = 16.4, 12.2, 4.2 Hz, 1H), 2.65 (dt,  $J$  = 16.3, 3.6 Hz, 1H), 2.34 – 2.13 (m, 2H), 1.50 (s, 9H).  **$^{13}\text{C}$  NMR (101 MHz,  $\text{CDCl}_3$ )**  $\delta$  146.51, 137.61, 129.75, 129.43, 128.26, 126.88, 125.48, 81.94, 48.95, 31.22, 28.25, 24.08. **ATR-FTIR ( $\text{cm}^{-1}$ )**: 2980, 1702, 1487, 1394, 1368, 1248, 1146, 1068, 1010, 860, 722; **ESI-MS**: calculated  $[\text{C}_{15}\text{H}_{19}\text{N}_2\text{O}_2\text{Cl} + \text{Na}]^+$ : 317.1038, found: 317.1026;

**tert-butyl 2-(3-chlorochroman-4-ylidene)hydrazinecarboxylate (2p)**

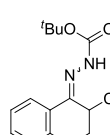  **$^1\text{H}$  NMR (300 MHz,  $\text{CDCl}_3$ )**  $\delta$  8.11 (t,  $J$  = 6.3 Hz, 2H), 7.36 – 7.27 (m, 1H), 7.07 – 7.00 (m, 1H), 6.97 (dd,  $J$  = 8.3, 0.8 Hz, 1H), 4.87 (dd,  $J$  = 3.7, 1.9 Hz, 1H), 4.51 (dd,  $J$  = 12.8, 1.9 Hz, 1H), 4.36 (dd,  $J$  = 12.9, 2.3 Hz, 1H), 1.57 (s, 9H).  **$^{13}\text{C}$  NMR (75 MHz,  $\text{CDCl}_3$ )**  $\delta$  155.55, 131.40, 125.47, 122.58, 117.48, 82.27, 70.05, 45.35, 28.22. **ATR-FTIR ( $\text{cm}^{-1}$ )**: 3140, 2982, 1693, 1615, 1497, 1369, 1217, 1148, 1027, 982, 758; **ESI-MS**: calculated  $[\text{C}_{14}\text{H}_{17}\text{N}_2\text{O}_3\text{Cl} + \text{Na}]^+$ : 319.0831, found: 319.0827;

### 3. Synthesis and Characterization of Products

**General procedure for enantioselective synthesis of **3** by formal [4+3] cycloaddition of in situ-derived azoalkenes and enals.**

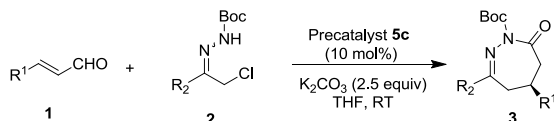

A dried and argon-filled Schlenk flask was charged with hydrazone **2** (0.2 mmol, 1.0 equiv) and  $K_2CO_3$  (0.5 mmol). Then, enal **1** (0.4 mmol) was added quickly to the mixture. Subsequently, triazolium salt **5c** (0.02 mmol, 10 mol%) in 2.5 mL THF was added to the mixture. The mixture was stirred at RT for 16 h. After purification by column chromatography on silica gel (Pentane: Ethyl acetate = 4:1) the desired product **3** was obtained.

Optimization of the reaction conditions.<sup>a</sup>

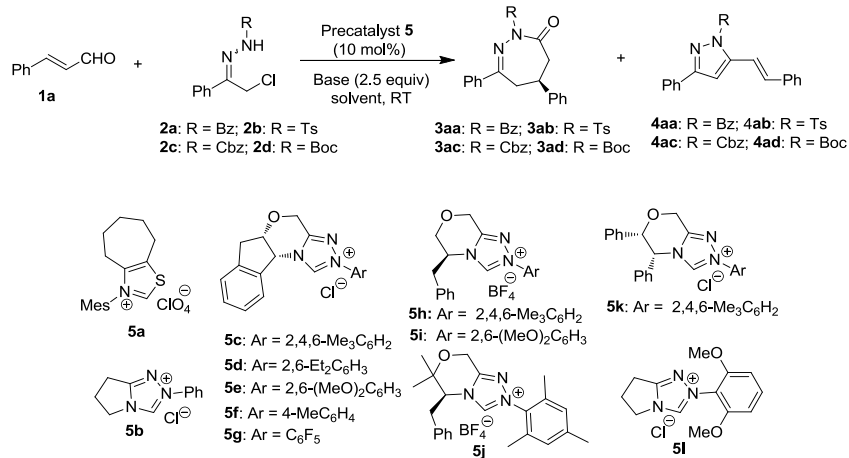

| entry           | Precat.   | <b>2</b>  | Base                               | Solvent           | Yield (%) <sup>b</sup> | <b>3/4</b> <sup>c</sup> | <i>ee</i> of <b>3</b> (%) <sup>d</sup> |
|-----------------|-----------|-----------|------------------------------------|-------------------|------------------------|-------------------------|----------------------------------------|
| 1               | <b>5a</b> | <b>2a</b> | K <sub>2</sub> CO <sub>3</sub>     | THF               | trace                  | -                       | -                                      |
| 2               | <b>5b</b> | <b>2a</b> | K <sub>2</sub> CO <sub>3</sub>     | THF               | trace                  | -                       | -                                      |
| 3               | <b>5c</b> | <b>2a</b> | K <sub>2</sub> CO <sub>3</sub>     | THF               | 52                     | 2:3                     | 91                                     |
| 4               | <b>5c</b> | <b>2b</b> | K <sub>2</sub> CO <sub>3</sub>     | THF               | 50                     | >20:1                   | 21                                     |
| 5               | <b>5c</b> | <b>2c</b> | K <sub>2</sub> CO <sub>3</sub>     | THF               | 37                     | 4:1                     | 98                                     |
| 6               | <b>5c</b> | <b>2d</b> | <b>K<sub>2</sub>CO<sub>3</sub></b> | <b>THF</b>        | <b>77</b>              | <b>9:1</b>              | <b>99</b>                              |
| 7               | <b>5c</b> | <b>2d</b> | Na <sub>2</sub> CO <sub>3</sub>    | THF               | 25                     | 8:1                     | 99                                     |
| 8               | <b>5c</b> | <b>2d</b> | DIPEA                              | THF               | 49                     | 9:1                     | 99                                     |
| 9               | <b>5c</b> | <b>2d</b> | DBU                                | THF               | trace                  | -                       | -                                      |
| 10              | <b>5c</b> | <b>2d</b> | NaOAc                              | THF               | 22                     | 5:1                     | 99                                     |
| 11              | <b>5c</b> | <b>2d</b> | Cs <sub>2</sub> CO <sub>3</sub>    | THF               | 70                     | 6:1                     | 99                                     |
| 12              | <b>5c</b> | <b>2d</b> | K <sub>2</sub> CO <sub>3</sub>     | DCM               | trace                  | -                       | -                                      |
| 13              | <b>5c</b> | <b>2d</b> | K <sub>2</sub> CO <sub>3</sub>     | toluene           | trace                  | -                       | -                                      |
| 14              | <b>5c</b> | <b>2d</b> | K <sub>2</sub> CO <sub>3</sub>     | DME               | 36                     | 7:1                     | 99                                     |
| 15              | <b>5c</b> | <b>2d</b> | K <sub>2</sub> CO <sub>3</sub>     | Dioxane           | 45                     | 5:1                     | 99                                     |
| 16              | <b>5c</b> | <b>2d</b> | K <sub>2</sub> CO <sub>3</sub>     | CHCl <sub>3</sub> | trace                  | -                       | -                                      |
| 17              | <b>5c</b> | <b>2d</b> | K <sub>2</sub> CO <sub>3</sub>     | Et <sub>2</sub> O | trace                  | -                       | -                                      |
| 18              | <b>5d</b> | <b>2d</b> | K <sub>2</sub> CO <sub>3</sub>     | THF               | 42                     | 8:1                     | 99                                     |
| 19              | <b>5e</b> | <b>2d</b> | K <sub>2</sub> CO <sub>3</sub>     | THF               | 75                     | 1:2                     | 99                                     |
| 20              | <b>5f</b> | <b>2d</b> | K <sub>2</sub> CO <sub>3</sub>     | THF               | 12                     | 6:1                     | 99                                     |
| 21              | <b>5g</b> | <b>2d</b> | K <sub>2</sub> CO <sub>3</sub>     | THF               | trace                  | -                       | -                                      |
| 22              | <b>5h</b> | <b>2d</b> | K <sub>2</sub> CO <sub>3</sub>     | THF               | 52                     | 6:1                     | 99                                     |
| 23 <sup>e</sup> | <b>5i</b> | <b>2d</b> | <b>K<sub>2</sub>CO<sub>3</sub></b> | <b>THF</b>        | <b>64</b>              | <b>&lt;1:20</b>         | -                                      |
| 24              | <b>5j</b> | <b>2d</b> | K <sub>2</sub> CO <sub>3</sub>     | THF               | trace                  | -                       | -                                      |
| 25              | <b>5k</b> | <b>2d</b> | K <sub>2</sub> CO <sub>3</sub>     | THF               | trace                  | -                       | -                                      |
| 26              | <b>5l</b> | <b>2d</b> | K <sub>2</sub> CO <sub>3</sub>     | THF               | 19                     | <1:20                   | -                                      |

<sup>a</sup>Conditions: **1a** (0.2 mmol), **2a** (0.1 mmol), chiral precatalyst (10 mol %), base (250 mol %), THF (1.5 mL), room temperature, 16 h. <sup>b</sup>Yield of the isolated product after column chromatography, and combined yield of **3** and **4**. <sup>c</sup>determined by <sup>1</sup>H NMR spectroscopy. <sup>d</sup>The *ee* value of **3** was determined by HPLC using a chiral column. <sup>e</sup>After 16 h, 6.0 equiv TsOH was added.

**(S)-tert-butyl 7-oxo-3,5-diphenyl-4,5,6,7-tetrahydro-1H-1,2-diazepine-1-carboxylate (3ad)**

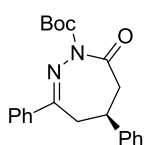

Total yield: 50 mg (70%); **<sup>1</sup>H NMR (300 MHz, CDCl<sub>3</sub>)** δ 7.70 – 7.62 (m, 2H), 7.42 – 7.29 (m, 3H), 7.26 – 7.16 (m, 5H), 3.76 – 3.62 (m, 1H), 3.17 (dd, *J* = 13.2, 6.8 Hz, 1H), 3.00 (dd, *J* = 13.2, 9.0 Hz, 1H), 2.84 – 2.68 (m, 2H), 1.53 (s, 9H). **<sup>13</sup>C NMR (75 MHz, CDCl<sub>3</sub>)** δ 169.28, 168.68, 149.98, 142.23, 135.62, 131.15, 128.94, 128.70, 127.52, 127.40, 126.84, 83.93, 43.77, 41.00, 35.24, 28.05. **ATR-FTIR (cm<sup>-1</sup>):** 2981, 1769, 1736, 1453, 1369, 1245, 1145, 1025, 848, 757, 696; **ESI-MS:** calculated [C<sub>22</sub>H<sub>24</sub>N<sub>2</sub>O<sub>3</sub> + Na]<sup>+</sup>: 387.1679, found: 387.1679; The product was analyzed by HPLC to determine the enantiomeric excess: 99% *ee* (OD-H, hexane/*i*-PrOH = 70/30, detector: 254 nm, flow rate: 1 mL/min), *t*<sub>1</sub>(major) = 6.5 min, *t*<sub>2</sub>(minor) = 15.3 min.

**(S)-tert-butyl 5-(4-fluorophenyl)-7-oxo-3-phenyl-4,5,6,7-tetrahydro-1H-1,2-diazepine-1-carboxylate (3bd)**

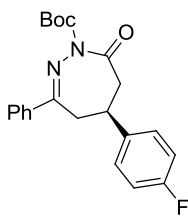

Total yield: 45 mg (60%); **<sup>1</sup>H NMR (300 MHz, CDCl<sub>3</sub>)** δ 7.73 – 7.64 (m, 2H), 7.46 – 7.30 (m, 3H), 7.24 – 7.13 (m, 2H), 7.00 – 6.89 (m, 2H), 3.76 – 3.63 (m, 1H), 3.16 (dd, *J* = 13.2, 6.7 Hz, 1H), 2.97 (dd, *J* = 13.2, 9.4 Hz, 1H), 2.80 (dd, *J* = 12.6, 7.8 Hz, 1H), 2.68 (dd, *J* = 12.6, 5.4 Hz, 1H), 1.53 (s, 9H). **<sup>13</sup>C NMR (75 MHz, CDCl<sub>3</sub>)** δ 169.10, 168.51, 135.50, 131.26, 128.77, 128.52, 128.41, 127.35, 115.92, 115.63, 110.00, 109.57, 84.06, 43.12, 41.19, 35.30, 28.03. **<sup>19</sup>F NMR (282 MHz, CDCl<sub>3</sub>)** δ -114.9. **ATR-FTIR (cm<sup>-1</sup>):** 2982, 1769, 1736, 1511, 1369, 1247, 1228, 1147, 837, 759; **ESI-MS:** calculated [C<sub>22</sub>H<sub>23</sub>N<sub>2</sub>O<sub>3</sub>F + Na]<sup>+</sup>: 405.1585, found: 405.1582; The product was analyzed by HPLC to determine the enantiomeric excess: 99% *ee* (OD-H, hexane/*i*-PrOH = 70/30, detector: 254 nm, flow rate: 1 mL/min), *t*<sub>1</sub>(major) = 5.9 min, *t*<sub>2</sub>(minor) = 8.6 min.

**(S)-tert-butyl 5-(4-chlorophenyl)-7-oxo-3-phenyl-4,5,6,7-tetrahydro-1H-1,2-diazepine-1-carboxylate (3cd)**

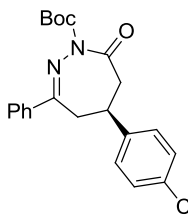

Total yield: 40 mg (51%); **<sup>1</sup>H NMR (300 MHz, CDCl<sub>3</sub>)** δ 7.70 (dd, *J* = 8.2, 1.4 Hz, 2H), 7.45 – 7.31 (m, 3H), 7.27 – 7.13 (m, 4H), 3.66 (dt, *J* = 14.5, 7.1 Hz, 1H), 3.15 (dd, *J* = 13.2, 6.7 Hz, 1H), 2.96 (dd, *J* = 13.2, 9.5 Hz, 1H), 2.80 (dd, *J* = 12.7, 7.8 Hz, 1H), 2.67 (dd, *J* = 12.7, 5.3 Hz, 1H), 1.53 (s, 9H). **<sup>13</sup>C NMR (75 MHz, CDCl<sub>3</sub>)** δ 168.99, 168.44, 149.90, 140.72, 135.45, 133.33, 131.30, 129.07, 128.80, 128.27, 127.33, 84.10, 43.24, 41.04, 35.07, 28.02. **ATR-FTIR (cm<sup>-1</sup>):**



2981, 1770, 1736, 1494, 1369, 1265, 1248, 1148, 1094, 1014, 732; **ESI-MS**: calculated  $[\text{C}_{22}\text{H}_{23}\text{N}_2\text{O}_3\text{Cl} + \text{Na}]^+$ : 421.1289, found: 421.1293; The product was analyzed by HPLC to determine the enantiomeric excess: 93% *ee* (OD-H, hexane/*i*-PrOH = 70/30, detector: 254 nm, flow rate: 1 mL/min),  $t_1$ (major) = 6.3 min,  $t_2$ (minor) = 8.3 min.

**(S)-tert-butyl 5-(4-bromophenyl)-7-oxo-3-phenyl-4,5,6,7-tetrahydro-1H-1,2-diazepine-1-carboxylate (3dd)**

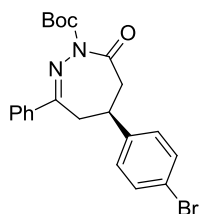

Total yield: 35 mg (40%);  **$^1\text{H}$  NMR (400 MHz,  $\text{CDCl}_3$ )**  $\delta$  7.72 – 7.67 (m, 2H), 7.44 – 7.32 (m, 5H), 7.15 – 7.08 (m, 2H), 3.65 (dt,  $J$  = 19.9, 7.3 Hz, 1H), 3.15 (dd,  $J$  = 13.2, 6.7 Hz, 1H), 2.96 (dd,  $J$  = 13.2, 9.5 Hz, 1H), 2.79 (dd,  $J$  = 12.7, 7.9 Hz, 1H), 2.67 (dd,  $J$  = 12.7, 5.2 Hz, 1H), 1.53 (s, 9H).  **$^{13}\text{C}$  NMR (101 MHz,  $\text{CDCl}_3$ )**  $\delta$  168.96, 168.42, 141.25, 135.46, 132.04, 131.31, 128.82, 128.62, 127.33, 121.42, 84.11, 43.31, 40.99, 34.99, 28.03. **ATR-FTIR ( $\text{cm}^{-1}$ )**: 2981, 1769, 1734, 1490, 1369, 1265, 1246, 1147, 1010, 759, 693; **ESI-MS**: calculated  $[\text{C}_{22}\text{H}_{23}\text{N}_2\text{O}_3\text{Br} + \text{Na}]^+$ : 465.0784, found: 465.0780; The product was analyzed by HPLC to determine the enantiomeric excess: 96% *ee* (OD-H, hexane/*i*-PrOH = 85/15, detector: 254 nm, flow rate: 1 mL/min),  $t_1$ (major) = 10.5 min,  $t_2$ (minor) = 16.3 min.

**(S)-tert-butyl 7-oxo-3-phenyl-5-(p-tolyl)-4,5,6,7-tetrahydro-1H-1,2-diazepine-1-carboxylate (3ed)**

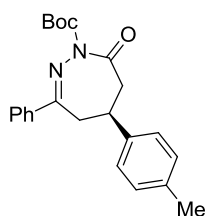

Total yield: 47 mg (63%);  **$^1\text{H}$  NMR (300 MHz,  $\text{CDCl}_3$ )**  $\delta$  7.72 – 7.65 (m, 2H), 7.43 – 7.29 (m, 3H), 7.14 – 6.98 (m, 4H), 3.67 (dt,  $J$  = 14.3, 7.0 Hz, 1H), 3.15 (dd,  $J$  = 13.2, 6.8 Hz, 1H), 2.99 (dd,  $J$  = 13.2, 9.0 Hz, 1H), 2.85 – 2.66 (m, 2H), 2.26 (s, 3H), 1.53 (s, 9H).  **$^{13}\text{C}$  NMR (75 MHz,  $\text{CDCl}_3$ )**  $\delta$  169.36, 168.78, 139.27, 137.18, 135.69, 131.10, 129.56, 128.69, 127.42, 126.71, 83.91, 43.48, 41.24, 35.29, 28.04, 21.03. **ATR-FTIR ( $\text{cm}^{-1}$ )**: 2980, 2922, 1769, 1737, 1369, 1265, 1246, 1147, 1048, 847, 758, 693; **ESI-MS**: calculated  $[\text{C}_{23}\text{H}_{26}\text{N}_2\text{O}_3 + \text{Na}]^+$ : 401.1836, found: 401.1834; The product was analyzed by HPLC to determine the enantiomeric excess: 99% *ee* (OD-H, hexane/*i*-PrOH = 70/30, detector: 254 nm, flow rate: 1 mL/min),  $t_1$ (major) = 5.3 min,  $t_2$ (minor) = 8.4 min.

**(S)-tert-butyl 5-(4-methoxyphenyl)-7-oxo-3-phenyl-4,5,6,7-tetrahydro-1H-1,2-diazepine-1-carboxylate (3fd)**

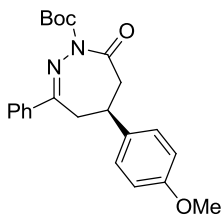

Total yield: 41 mg (52%); **<sup>1</sup>H NMR (300 MHz, CDCl<sub>3</sub>)** δ 7.72 – 7.64 (m, 2H), 7.45 – 7.29 (m, 3H), 7.13 (d, *J* = 8.7 Hz, 2H), 6.79 (t, *J* = 5.9 Hz, 2H), 3.72 (s, 3H), 3.65 (dd, *J* = 14.8, 7.4 Hz, 1H), 3.15 (dd, *J* = 13.2, 6.8 Hz, 1H), 2.97 (dd, *J* = 13.2, 8.9 Hz, 1H), 2.73 (qd, *J* = 12.5, 6.8 Hz, 2H), 1.53 (s, 9H). **<sup>13</sup>C NMR (75 MHz, CDCl<sub>3</sub>)** δ 169.35, 168.73, 158.86, 149.99, 135.69, 134.37, 131.11, 128.70, 127.91, 127.42, 114.22, 83.90, 55.31, 43.12, 41.36, 35.42, 28.04. **ATR-FTIR (cm<sup>-1</sup>):** 2981, 1769, 1736, 1611, 1515, 1369, 1247, 1148, 1031, 835, 759, 693; **ESI-MS:** calculated [C<sub>23</sub>H<sub>26</sub>N<sub>2</sub>O<sub>4</sub> + Na]<sup>+</sup>: 417.1785, found: 417.1787; **HPLC**(OD-H, hexane/*i*-PrOH = 70/30, detector: 254 nm, flow rate: 1 mL/min), *t*<sub>1</sub>(major) = 7.2 min, *t*<sub>2</sub>(minor) = 11.1 min.

**(S)-tert-butyl 5-(furan-2-yl)-7-oxo-3-phenyl-4,5,6,7-tetrahydro-1H-1,2-diazepine-1-carboxylate (3gd)**

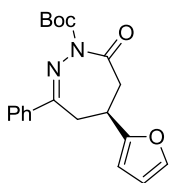

Total yield: 42 mg (60%); **<sup>1</sup>H NMR (300 MHz, CDCl<sub>3</sub>)** δ 7.62 – 7.50 (m, 2H), 7.42 – 7.23 (m, 4H), 6.22 (dd, *J* = 3.1, 1.9 Hz, 1H), 6.04 (d, *J* = 3.2 Hz, 1H), 3.81 (p, *J* = 7.2 Hz, 1H), 3.15 (qd, *J* = 13.4, 6.8 Hz, 2H), 2.74 (d, *J* = 7.5 Hz, 2H), 1.52 (s, 9H). **<sup>13</sup>C NMR (75 MHz, CDCl<sub>3</sub>)** δ 168.42, 168.37, 154.47, 149.80, 141.98, 135.73, 131.08, 128.60, 127.25, 110.48, 106.02, 83.96, 38.92, 37.21, 32.29, 28.02. **ATR-FTIR (cm<sup>-1</sup>):** 2982, 1770, 1734, 1369, 1245, 1147, 1015, 757, 731, 692; **ESI-MS:** calculated [C<sub>20</sub>H<sub>22</sub>N<sub>2</sub>O<sub>4</sub> + Na]<sup>+</sup>: 377.1472, found: 377.1478; The product was analyzed by HPLC to determine the enantiomeric excess: 99% *ee* (OD-H, hexane/*i*-PrOH = 70/30, detector: 254 nm, flow rate: 1 mL/min), *t*<sub>1</sub>(major) = 5.7 min, *t*<sub>2</sub>(minor) = 10.0 min.

**(S)-tert-butyl 5-methyl-7-oxo-3-phenyl-4,5,6,7-tetrahydro-1H-1,2-diazepine-1-carboxylate (3hd)**

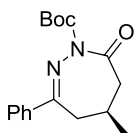

Total yield: 38 mg (62%); **<sup>1</sup>H NMR (300 MHz, CDCl<sub>3</sub>)** δ 7.81 (m, 2H), 7.45 – 7.34 (m, 3H), 2.99 – 2.85 (m, 1H), 2.67 – 2.51 (m, 3H), 2.20 – 2.10 (m, 1H), 1.51 (s, 9H), 1.13 (d, *J* = 6.1 Hz, 3H). **<sup>13</sup>C NMR (75 MHz, CDCl<sub>3</sub>)** δ 169.35, 169.32, 149.96, 136.14, 131.07, 128.75, 127.24, 83.74, 42.67, 34.65, 33.84, 28.02, 21.46. **ATR-FTIR (cm<sup>-1</sup>):** 2978, 2362, 1769, 1734, 1458, 1369, 1244, 1148, 1017, 851, 758, 692; **ESI-MS:** calculated [C<sub>17</sub>H<sub>22</sub>N<sub>2</sub>O<sub>3</sub> + Na]<sup>+</sup>: 325.1523, found: 325.1525; The product was analyzed by HPLC to determine the enantiomeric excess: 99% *ee* (OD-H, hexane/*i*-PrOH = 70/30, detector: 254 nm, flow rate: 1 mL/min), *t*<sub>1</sub>(major) = 5.0 min, *t*<sub>2</sub>(minor) = 5.9 min.

**(S)-tert-butyl 7-oxo-3-phenyl-5-propyl-4,5,6,7-tetrahydro-1H-1,2-diazepine-1-carboxylate (3id)**

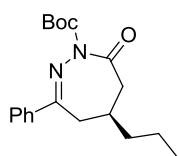

Total yield: 37 mg (57%);  $^1\text{H}$  NMR (300 MHz,  $\text{CDCl}_3$ )  $\delta$  7.84 – 7.76 (m, 2H), 7.45 – 7.35 (m, 3H), 2.92 (dd,  $J$  = 12.9, 6.4 Hz, 1H), 2.64 – 2.50 (m, 2H), 2.48 – 2.36 (m, 1H), 2.19 (dd,  $J$  = 11.9, 4.7 Hz, 1H), 1.51 (s, 9H), 1.40 (dd,  $J$  = 8.7, 4.1 Hz, 4H), 0.85 (t,  $J$  = 7.1 Hz, 3H).  $^{13}\text{C}$  NMR (75 MHz,  $\text{CDCl}_3$ )  $\delta$  169.59, 169.44, 149.98, 136.20, 131.05, 128.75, 127.19, 83.75, 40.80, 38.48, 37.62, 33.02, 28.02, 20.22, 13.85. **ATR-FTIR** ( $\text{cm}^{-1}$ ): 2960, 1770, 1717, 1456, 1368, 1244, 1148, 851, 757, 693; **ESI-MS**: calculated  $[\text{C}_{19}\text{H}_{26}\text{N}_2\text{O}_3 + \text{Na}]^+$ : 353.1836, found: 353.1828; The product was analyzed by HPLC to determine the enantiomeric excess: 93% *ee* (OD-H, hexane/*i*-PrOH = 85/15, detector: 254 nm, flow rate: 1 mL/min),  $t_1$ (major) = 5.5 min,  $t_2$ (minor) = 7.0 min.

**(S)-tert-butyl 7-oxo-5-phenyl-3-(p-tolyl)-4,5,6,7-tetrahydro-1H-1,2-diazepine-1-carboxylate (3ae)**

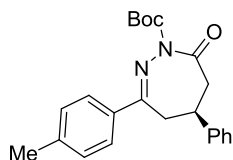

Total yield: 51 mg (68%);  $^1\text{H}$  NMR (300 MHz,  $\text{CDCl}_3$ )  $\delta$  7.56 (d,  $J$  = 8.3 Hz, 2H), 7.32 – 7.19 (m, 5H), 7.12 (d,  $J$  = 8.0 Hz, 2H), 3.74 – 3.62 (m, 1H), 3.16 (dd,  $J$  = 13.2, 6.8 Hz, 1H), 2.98 (dd,  $J$  = 13.2, 8.9 Hz, 1H), 2.85 – 2.67 (m, 2H), 2.32 (s, 3H), 1.53 (s, 9H).  $^{13}\text{C}$  NMR (75 MHz,  $\text{CDCl}_3$ )  $\delta$  169.39, 168.70, 150.02, 142.31, 141.66, 132.77, 129.42, 128.92, 127.48, 127.38, 126.87, 83.86, 43.65, 40.97, 35.09, 28.05, 21.45. **ATR-FTIR** ( $\text{cm}^{-1}$ ): 2981, 1769, 1734, 1454, 1369, 1245, 1146, 847, 759, 734, 700; **ESI-MS**: calculated  $[\text{C}_{23}\text{H}_{26}\text{N}_2\text{O}_3 + \text{Na}]^+$ : 401.1836, found: 401.1830; The product was analyzed by HPLC to determine the enantiomeric excess: 99% *ee* (OD-H, hexane/*i*-PrOH = 70/30, detector: 254 nm, flow rate: 1 mL/min),  $t_1$ (major) = 6.8 min,  $t_2$ (minor) = 12.7 min.

**(S)-tert-butyl 3-(4-methoxyphenyl)-7-oxo-5-phenyl-4,5,6,7-tetrahydro-1H-1,2-diazepine-1-carboxylate (3af)**

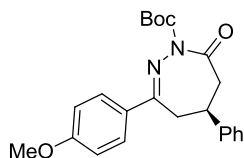

Total yield: 50 mg (64%);  $^1\text{H}$  NMR (400 MHz,  $\text{CDCl}_3$ )  $\delta$  7.65 – 7.58 (m, 2H), 7.29 – 7.19 (m, 5H), 6.85 – 6.80 (m, 2H), 3.77 (s, 3H), 3.72 – 3.62 (m, 1H), 3.15 (dd,  $J$  = 13.3, 6.9 Hz, 1H), 2.97 (dd,  $J$  = 13.3, 8.5 Hz, 1H), 2.80 – 2.69 (m, 2H), 1.53 (s, 9H).  $^{13}\text{C}$  NMR (101 MHz,  $\text{CDCl}_3$ )  $\delta$  169.47, 168.24, 162.07, 150.07, 142.33, 129.16, 128.92, 127.99, 127.47, 126.89, 114.01, 83.80, 55.42, 43.51, 40.89, 34.92, 28.06. **ATR-FTIR** ( $\text{cm}^{-1}$ ): 2979, 1768, 1735, 1606, 1515, 1455, 1369, 1249, 1149, 1027, 842, 701; **ESI-MS**: calculated  $[\text{C}_{23}\text{H}_{26}\text{N}_2\text{O}_4 + \text{Na}]^+$ : 417.1785, found: 417.1785; The

product was analyzed by HPLC to determine the enantiomeric excess: 99% *ee* (OD-H, hexane/*i*-PrOH = 70/30, detector: 254 nm, flow rate: 1 mL/min),  $t_1$ (major) = 9.5 min,  $t_2$ (minor) = 16.6 min.

**(S)-tert-butyl 3-(4-fluorophenyl)-7-oxo-5-phenyl-4,5,6,7-tetrahydro-1H-1,2-diazepine-1-carboxylate (3ag)**

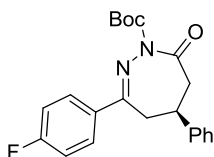

Total yield: 44 mg (58%);  $^1\text{H}$  NMR (300 MHz,  $\text{CDCl}_3$ )  $\delta$  7.69 – 7.60 (m, 2H), 7.29 – 7.19 (m, 5H), 7.04 – 6.94 (m, 2H), 3.71 (p,  $J$  = 7.1 Hz, 1H), 3.16 (dd,  $J$  = 13.3, 7.0 Hz, 1H), 2.99 (dd,  $J$  = 13.3, 8.2 Hz, 1H), 2.76 (d,  $J$  = 7.0 Hz, 2H), 1.58 – 1.49 (m, 9H).  $^{13}\text{C}$  NMR (75 MHz,  $\text{CDCl}_3$ )  $\delta$  169.24, 167.46, 162.91, 149.95, 142.00, 131.77, 129.65, 129.53, 128.98, 127.62, 126.81, 115.92, 115.63, 84.06, 43.65, 40.81, 35.20, 28.14, 28.03.  $^{19}\text{F}$  NMR (282 MHz,  $\text{CDCl}_3$ )  $\delta$  -108.6. ATR-FTIR ( $\text{cm}^{-1}$ ): 2981, 1769, 1734, 1602, 1511, 1369, 1235, 1148, 845, 760, 700; ESI-MS: calculated  $[\text{C}_{22}\text{H}_{23}\text{N}_2\text{O}_3\text{F} + \text{Na}]^+$ : 405.1585, found: 405.1590; The product was analyzed by HPLC to determine the enantiomeric excess: 98% *ee* (OD-H, hexane/*i*-PrOH = 70/30, detector: 254 nm, flow rate: 1 mL/min),  $t_1$ (major) = 7.3 min,  $t_2$ (minor) = 12.6 min.

**(S)-tert-butyl 3-(4-chlorophenyl)-7-oxo-5-phenyl-4,5,6,7-tetrahydro-1H-1,2-diazepine-1-carboxylate (3ah)**

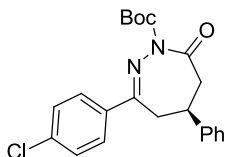

Total yield: 56 mg (71%);  $^1\text{H}$  NMR (400 MHz,  $\text{CDCl}_3$ )  $\delta$  7.60 – 7.54 (m, 2H), 7.30 – 7.19 (m, 7H), 3.71 (p,  $J$  = 7.2 Hz, 1H), 3.20 – 3.12 (m, 1H), 2.98 (dd,  $J$  = 13.3, 8.1 Hz, 1H), 2.79 – 2.72 (m, 2H), 1.53 (s, 9H).  $^{13}\text{C}$  NMR (101 MHz,  $\text{CDCl}_3$ )  $\delta$  169.17, 167.31, 149.93, 141.94, 137.42, 134.06, 129.15, 129.00, 128.92, 128.84, 128.80, 128.71, 127.65, 126.79, 84.12, 43.75, 40.83, 35.11, 28.03, 27.95. ATR-FTIR ( $\text{cm}^{-1}$ ): 2982, 1769, 1733, 1369, 1246, 1146, 1092, 1012, 843, 734, 699; ESI-MS: calculated  $[\text{C}_{22}\text{H}_{23}\text{N}_2\text{O}_3\text{Cl} + \text{Na}]^+$ : 421.1289, found: 421.1286; The product was analyzed by HPLC to determine the enantiomeric excess: 99% *ee* (OD-H, hexane/*i*-PrOH = 70/30, detector: 254 nm, flow rate: 1 mL/min),  $t_1$ (major) = 7.4 min,  $t_2$ (minor) = 12.9 min.

**(S)-tert-butyl 3-(4-bromophenyl)-7-oxo-5-phenyl-4,5,6,7-tetrahydro-1H-1,2-diazepine-1-carboxylate (3ai)**

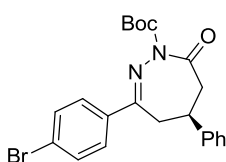

Total yield: 53 mg (60%);  $^1\text{H}$  NMR (400 MHz,  $\text{CDCl}_3$ )  $\delta$  7.57 – 7.39 (m, 4H), 7.30 – 7.15 (m, 5H), 3.71 (p,  $J$  = 7.2 Hz, 1H), 3.15 (dd,  $J$  = 13.3, 7.0 Hz, 1H), 3.03 – 2.92 (m, 1H), 2.79 – 2.73 (m, 2H), 1.53 (s, 9H).  $^{13}\text{C}$  NMR

(**101 MHz, CDCl<sub>3</sub>**)  $\delta$  169.15, 167.38, 149.92, 141.93, 134.51, 131.89, 129.01, 128.90, 127.66, 126.79, 125.90, 84.13, 43.77, 40.83, 35.07, 28.03. **ATR-FTIR (cm<sup>-1</sup>):** 2981, 1769, 1733, 1369, 1246, 1145, 1073, 1008, 843, 809, 758, 733, 699; **ESI-MS:** calculated [C<sub>22</sub>H<sub>23</sub>N<sub>2</sub>O<sub>3</sub>Br + Na]<sup>+</sup>: 465.0784, found: 465.0783; The product was analyzed by HPLC to determine the enantiomeric excess: 99% *ee* (OD-H, hexane/*i*-PrOH = 70/30, detector: 254 nm, flow rate: 1 mL/min), *t*<sub>1</sub>(major) = 7.7 min, *t*<sub>2</sub>(minor) = 13.0 min.

**(S)-tert-butyl 7-oxo-5-phenyl-3-(4-(trifluoromethyl)phenyl)-4,5,6,7-tetrahydro-1H-1,2-diazepine-1-carboxylate (3aj)**

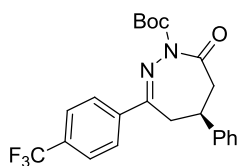

Total yield: 52 mg (61%); **<sup>1</sup>H NMR (300 MHz, CDCl<sub>3</sub>)**  $\delta$  7.73 (d, *J* = 8.2 Hz, 2H), 7.56 (d, *J* = 8.3 Hz, 2H), 7.33 – 7.20 (m, 5H), 3.75 (p, *J* = 7.2 Hz, 1H), 3.20 (dd, *J* = 13.4, 7.0 Hz, 1H), 3.02 (dd, *J* = 13.4, 8.1 Hz, 1H), 2.78 (d, *J* = 7.1 Hz, 2H), 1.55 (s, 9H). **<sup>13</sup>C NMR (75 MHz, CDCl<sub>3</sub>)**  $\delta$  169.08, 166.87, 149.84, 141.76, 129.06, 127.74, 126.74, 125.63, 125.58, 125.53, 84.30, 43.92, 40.83, 35.35, 28.01. **<sup>19</sup>F NMR (282 MHz, CDCl<sub>3</sub>)**  $\delta$  -62.9. **ATR-FTIR (cm<sup>-1</sup>):** 2983, 1771, 1735, 1323, 1247, 1147, 1125, 1113, 1086, 1015, 848, 738, 700; **ESI-MS:** calculated [C<sub>23</sub>H<sub>23</sub>N<sub>2</sub>O<sub>3</sub>F<sub>3</sub> + Na]<sup>+</sup>: 455.1553, found: 455.1548; The product was analyzed by HPLC to determine the enantiomeric excess: 99% *ee* (OD-H, hexane/*i*-PrOH = 70/30, detector: 254 nm, flow rate: 1 mL/min), *t*<sub>1</sub>(major) = 6.8 min, *t*<sub>2</sub>(minor) = 11.1 min.

**(S)-tert-butyl 3-(naphthalen-2-yl)-7-oxo-5-phenyl-4,5,6,7-tetrahydro-1H-1,2-diazepine-1-carboxylate (3ak)**

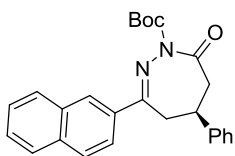

yield: 51 mg (61%); **<sup>1</sup>H NMR (300 MHz, CDCl<sub>3</sub>)**  $\delta$  8.04 – 7.98 (m, 1H), 7.78 (dd, *J* = 8.4, 3.4 Hz, 2H), 7.71 (d, *J* = 1.4 Hz, 1H), 7.65 – 7.58 (m, 1H), 7.50 – 7.38 (m, 2H), 7.31 – 7.21 (m, 5H), 3.81 (p, *J* = 7.2 Hz, 1H), 3.32 (dd, *J* = 13.3, 7.1 Hz, 1H), 3.11 (dd, *J* = 13.3, 7.9 Hz, 1H), 2.80 (d, *J* = 7.1 Hz, 2H), 1.56 (s, 9H). **<sup>13</sup>C NMR (75 MHz, CDCl<sub>3</sub>)**  $\delta$  169.47, 168.33, 150.02, 142.22, 134.49, 133.01, 132.70, 128.98, 128.91, 128.63, 128.49, 127.70, 127.59, 126.95, 126.67, 123.75, 84.02, 43.71, 40.74, 35.27, 28.07. **ATR-FTIR (cm<sup>-1</sup>):** 2981, 1767, 1732, 1454, 1369, 1246, 1144, 1051, 811, 757, 733, 699; **ESI-MS:** calculated [C<sub>26</sub>H<sub>26</sub>N<sub>2</sub>O<sub>3</sub> + Na]<sup>+</sup>: 437.1836, found: 437.1824; The product was analyzed by HPLC to determine the enantiomeric excess: 99% *ee* (OD-H, hexane/*i*-PrOH = 70/30, detector: 254 nm, flow rate: 1 mL/min), *t*<sub>1</sub>(major) = 8.4 min, *t*<sub>2</sub>(minor) = 14.0 min.

**(S)-tert-butyl 3-(3-bromophenyl)-7-oxo-5-phenyl-4,5,6,7-tetrahydro-1H-1,2-diazepine-1-carboxylate (3al)**

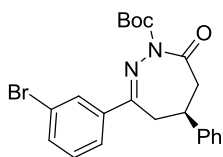

Total yield: 53 mg (60%); **<sup>1</sup>H NMR (400 MHz, CDCl<sub>3</sub>)** δ 7.77 (t, *J* = 1.8 Hz, 1H), 7.51 (m, 2H), 7.30 – 7.14 (m, 6H), 3.77 – 3.67 (m, 1H), 3.15 (dd, *J* = 13.3, 6.9 Hz, 1H), 3.05 – 2.92 (m, 1H), 2.76 (d, *J* = 7.0 Hz, 2H), 1.54 (s, 9H). **<sup>13</sup>C NMR (101 MHz, CDCl<sub>3</sub>)** δ 169.11, 167.08, 149.87, 141.84, 137.69, 133.96, 130.49, 130.12, 129.02, 127.71, 126.77, 125.95, 122.94, 84.21, 43.79, 40.81, 35.34, 28.02. **ATR-FTIR (cm<sup>-1</sup>):** 2980, 1770, 1735, 1454, 1369, 1244, 1145, 1051, 849, 759, 735, 700; **ESI-MS:** calculated [C<sub>22</sub>H<sub>23</sub>N<sub>2</sub>O<sub>3</sub>Br + Na]<sup>+</sup>: 465.0784, found: 465.0783; The product was analyzed by HPLC to determine the enantiomeric excess: 99% *ee* (OD-H, hexane/*i*-PrOH = 70/30, detector: 254 nm, flow rate: 1 mL/min), *t*<sub>1</sub>(major) = 7.7 min, *t*<sub>2</sub>(minor) = 14.3 min.

**(S)-tert-butyl 7-oxo-5-phenyl-3-(*m*-tolyl)-4,5,6,7-tetrahydro-1H-1,2-diazepine-1-carboxylate (3am)**

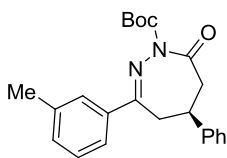

Total yield: 50 mg (67%); **<sup>1</sup>H NMR (300 MHz, CDCl<sub>3</sub>)** δ 7.43 (dd, *J* = 9.1, 4.2 Hz, 2H), 7.29 – 7.19 (m, 7H), 3.76 – 3.64 (m, 1H), 3.17 (dd, *J* = 13.2, 6.9 Hz, 1H), 2.99 (dd, *J* = 13.2, 8.9 Hz, 1H), 2.86 – 2.69 (m, 2H), 2.27 (s, 3H), 1.54 (s, 9H). **<sup>13</sup>C NMR (75 MHz, CDCl<sub>3</sub>)** δ 169.31, 169.04, 150.01, 142.26, 138.42, 135.60, 131.92, 128.92, 128.55, 128.08, 127.50, 126.88, 124.59, 83.93, 43.67, 40.88, 35.40, 28.05, 21.41. **ATR-FTIR (cm<sup>-1</sup>):** 2981, 1769, 1735, 1454, 1369, 1247, 1147, 1052, 759, 734, 698; **ESI-MS:** calculated [C<sub>23</sub>H<sub>26</sub>N<sub>2</sub>O<sub>3</sub> + Na]<sup>+</sup>: 401.1836, found: 401.1836; The product was analyzed by HPLC to determine the enantiomeric excess: 99% *ee* (OD-H, hexane/*i*-PrOH = 70/30, detector: 254 nm, flow rate: 1 mL/min), *t*<sub>1</sub>(major) = 5.8 min, *t*<sub>2</sub>(minor) = 12.0 min.

**(S)-tert-butyl 3-(tert-butyl)-7-oxo-5-phenyl-4,5,6,7-tetrahydro-1H-1,2-diazepine-1-carboxylate (3an)**

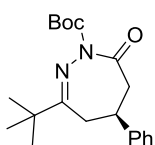

Total yield: 50 mg (73%); **<sup>1</sup>H NMR (400 MHz, CDCl<sub>3</sub>)** δ 7.57 – 7.39 (m, 4H), 7.30 – 7.15 (m, 5H), 3.71 (p, *J* = 7.2 Hz, 1H), 3.15 (dd, *J* = 13.3, 7.0 Hz, 1H), 3.03 – 2.92 (m, 1H), 2.79 – 2.73 (m, 2H), 1.53 (s, 9H). **<sup>13</sup>C NMR (101 MHz, CDCl<sub>3</sub>)** δ 179.88, 168.74, 149.85, 142.78, 128.90, 127.32, 126.74, 83.33, 43.43, 40.69, 39.54, 33.74, 28.00, 27.62. **ATR-FTIR (cm<sup>-1</sup>):** 2976, 1768, 1737, 1456, 1368, 1267, 1245, 1149, 1025, 758, 734, 699; **ESI-MS:** calculated [C<sub>20</sub>H<sub>28</sub>N<sub>2</sub>O<sub>3</sub> + Na]<sup>+</sup>: 367.1992, found: 367.1987; The product was analyzed

by HPLC to determine the enantiomeric excess: 98% *ee* (OD-H, hexane/*i*-PrOH = 70/30, detector: 254 nm, flow rate: 1 mL/min),  $t_1$ (major) = 4.2 min,  $t_2$ (minor) = 8.7 min.

**(5R,5aS)-tert-butyl 3-oxo-5-phenyl-3,4,5,5a,6,7-hexahydro-2H-naphtho[1,2-c][1,2]diazepine-2-carboxylate (3ao)**

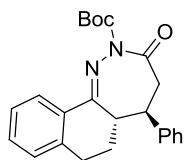

Total yield: 51 mg (65%);  $^1\text{H}$  NMR (400 MHz,  $\text{CDCl}_3$ )  $\delta$  8.32 – 8.26 (m, 1H), 7.25 – 7.20 (m, 2H), 7.15 – 7.09 (m, 1H), 7.03 (t,  $J$  = 7.4 Hz, 2H), 6.92 (d,  $J$  = 7.2 Hz, 2H), 6.84 – 6.77 (m, 1H), 3.75 – 3.63 (m, 1H), 3.50 (td,  $J$  = 7.4, 3.6 Hz, 1H), 2.97 (t,  $J$  = 12.4 Hz, 1H), 2.60 (dd,  $J$  = 12.1, 5.9 Hz, 1H), 2.19 (dt,  $J$  = 16.7, 5.2 Hz, 1H), 1.97 (ddt,  $J$  = 12.8, 11.2, 6.3 Hz, 1H), 1.66 (ddd,  $J$  = 13.9, 8.8, 5.0 Hz, 1H), 1.52 (s, 9H), 1.41 (m, 1H).  $^{13}\text{C}$  NMR (101 MHz,  $\text{CDCl}_3$ )  $\delta$  169.78, 166.31, 150.27, 140.71, 139.61, 131.32, 131.07, 128.55, 128.53, 127.93, 127.82, 126.57, 125.40, 83.92, 50.98, 42.81, 38.08, 28.05, 25.34, 23.59. ATR-FTIR ( $\text{cm}^{-1}$ ): 2980, 1769, 1735, 1369, 1267, 1243, 1148, 1047, 848, 764, 701; ESI-MS: calculated  $[\text{C}_{24}\text{H}_{26}\text{N}_2\text{O}_3 + \text{Na}]^+$ : 413.1836, found: 413.1830; The product was analyzed by HPLC to determine the enantiomeric excess: 87% *ee* (OD-H, hexane/*i*-PrOH = 70/30, detector: 254 nm, flow rate: 1 mL/min),  $t_1$ (major) = 5.7 min,  $t_2$ (minor) = 8.0 min.

**(5R,5aS)-tert-butyl 3-oxo-5-phenyl-4,5,5a,6-tetrahydrochromeno[4,3-c][1,2]diazepine-2(3H)-carboxylate (3ap)**

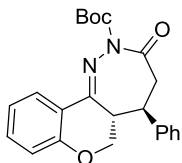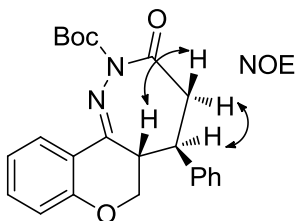

Total yield: 50 mg (64%);  $^1\text{H}$  NMR (400 MHz,  $\text{CDCl}_3$ )  $\delta$  8.22 (dd,  $J$  = 8.0, 1.6 Hz, 1H), 7.22 – 7.17 (m, 1H), 7.16 – 7.10 (m, 1H), 7.08 – 7.00 (m, 2H), 6.97 – 6.87 (m, 3H), 6.43 – 6.36 (m, 1H), 4.22 (dt,  $J$  = 6.4, 3.2 Hz, 1H), 4.18 – 4.08 (m, 1H), 3.79 – 3.69 (m, 1H), 3.37 (dd,  $J$  = 8.2, 3.9 Hz, 1H), 2.93 (t,  $J$  = 12.5 Hz, 1H), 2.59 (dd,  $J$  = 12.2, 5.9 Hz, 1H), 1.54 (s, 9H).  $^{13}\text{C}$  NMR (101 MHz,  $\text{CDCl}_3$ )  $\delta$  169.81, 160.51, 157.48, 150.05, 138.37, 133.59, 128.24, 128.01, 127.43, 125.08, 121.52, 118.09, 117.78, 84.15, 65.58, 48.78, 41.95, 37.98, 28.04. ATR-FTIR ( $\text{cm}^{-1}$ ): 2981, 1769, 1719, 1482, 1369, 1267, 1245, 1148, 1129, 1020, 831, 761, 734, 700; ESI-MS: calculated  $[\text{C}_{23}\text{H}_{24}\text{N}_2\text{O}_4 + \text{Na}]^+$ : 415.1628, found: 415.1624; The product was analyzed by HPLC to

determine the enantiomeric excess: 85% *ee* (OD-H, hexane/*i*-PrOH = 70/30, detector: 254 nm, flow rate: 1 mL/min),  $t_1$ (major) = 8.4 min,  $t_2$ (minor) = 15.4 min.

For gram scale synthesis of **3ad**:

To a 50 mL flame-dried Schlenk tube was charged with hydrazone **2d** (1.34g, 5.0 mmol, 1.0 equiv),  $K_2CO_3$  (1.72g, 12.5 mmol, 2.5 equiv). Then, enal **1a** (1.32g, 10 mmol, 2.0 equiv) was added to the mixture. Subsequently, triazolium salt **5c** (184 mmol, 0.5 mmol, 0.1 equiv) in 25 mL THF was slowly added to the mixture. When the reaction was complete, the flask was diluted with  $CH_2Cl_2$  and the solution was transferred to a round flask and concentrated. The residue was purified by flash chromatography (n-pentane/ethyl acetate 4:1) to give 0.92 gram of **3ad** with 51% yield and 99% *ee*.

**General procedure for diverse synthesis of 4 via NHC-catalyzed formal [4+1] cycloaddition of in situ-derived azoalkenes and enals.**

A dried and argon-filled Schlenk flask was charged with Hydrazone **2d** (0.2 mmol, 1.0 equiv) and  $K_2CO_3$  (0.5 mmol). Then, enal **1a** (0.4 mmol) was added quickly to the mixture. Subsequently, triazolium salt **5c** (0.02 mmol, 10 mol%) in 2.5 mL THF was added to the mixture. The mixture was stirred at RT for 16 h. The reaction mixture was opened and *p*-toluenesulfonic acid monohydrate (230 mg, 6 equiv) was added. After 30 min, the reaction was diluted with dichloromethane and transferred to separatory funnel containing saturate sodium hydrogen carbonate solution (15 mL). The organic phase was separated and aqueous phase was extracted with dichloromethane (3 x 15 mL). The organic phases were combined and solvent removed *in vacuo*. After purification by column chromatography on silica gel (Pentane: Ethyl acetate = 15:1) the desired product **4** was obtained.

**(E)-tert-butyl 3-phenyl-5-styryl-1H-pyrazole-1-carboxylate (4ad)**

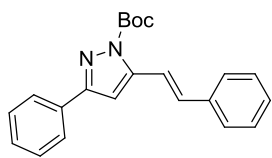

Total yield: 44 mg (64%);  $^1H$  NMR (400 MHz,  $CDCl_3$ )  $\delta$  7.88 – 7.82 (m, 2H), 7.68 (d,  $J$  = 16.4 Hz, 1H), 7.50 – 7.44 (m, 2H), 7.39 – 7.28 (m, 5H), 7.26 – 7.21 (m, 1H), 7.06 (d,  $J$  = 16.4 Hz, 1H), 6.88 (s, 1H), 1.64 (s, 9H).  $^{13}C$  NMR (101 MHz,  $CDCl_3$ )  $\delta$  153.64, 146.44, 136.44, 133.53,

131.90, 128.95, 128.81, 128.62, 128.54, 126.92, 126.38, 117.30, 104.26, 85.41, 28.06. **ATR-FTIR** ( $cm^{-1}$ ): 2979, 1742, 1555, 1439, 1352, 1311, 1155, 1104, 1078, 948, 850, 769, 693; **ESI-MS**: calculated  $[C_{22}H_{22}N_2O_2 + Na]^+$ : 369.1573, found: 369.1566;

**(E)-tert-butyl 5-(4-fluorostyryl)-3-phenyl-1H-pyrazole-1-carboxylate (4bd)**



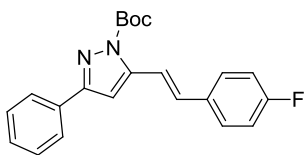

Total yield: 41 mg (57%);  $^1\text{H}$  NMR (400 MHz,  $\text{CDCl}_3$ )  $\delta$  7.74 – 7.60 (m, 3H), 7.49 – 7.43 (m, 2H), 7.35 – 7.28 (m, 2H), 7.27 – 7.20 (m, 2H), 7.12 (d,  $J$  = 7.6 Hz, 1H), 7.05 (d,  $J$  = 16.4 Hz, 1H), 6.87 (d,  $J$  = 0.6 Hz, 1H), 2.34 (s, 3H), 1.64 (s, 9H).  $^{13}\text{C}$  NMR (101 MHz,  $\text{CDCl}_3$ )  $\delta$  153.63, 149.02, 146.33, 132.65, 132.26, 131.85, 128.99, 128.63, 128.58, 128.50, 126.36, 117.11, 115.95, 115.73, 104.20, 85.44, 28.04.  $^{19}\text{F}$  NMR (282 MHz,  $\text{CDCl}_3$ )  $\delta$  -112.6. ATR-FTIR ( $\text{cm}^{-1}$ ): 2982, 1741, 1509, 1351, 1325, 1231, 1155, 1103, 1078, 948, 822, 769, 694; ESI-MS: calculated  $[\text{C}_{22}\text{H}_{21}\text{N}_2\text{O}_2\text{F} + \text{Na}]^+$ : 387.1479, found: 387.1473;

**(E)-tert-butyl 5-(4-methylstyryl)-3-phenyl-1H-pyrazole-1-carboxylate (4ed)**

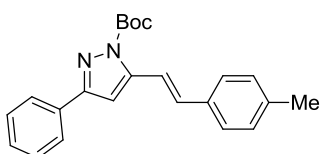

Total yield: 37 mg (52%);  $^1\text{H}$  NMR (400 MHz,  $\text{CDCl}_3$ )  $\delta$  7.88 – 7.82 (m, 2H), 7.63 (d,  $J$  = 16.5 Hz, 1H), 7.38 – 7.29 (m, 5H), 7.11 (d,  $J$  = 7.9 Hz, 2H), 7.03 (d,  $J$  = 16.4 Hz, 1H), 6.86 (d,  $J$  = 0.6 Hz, 1H), 2.30 (s, 3H), 1.63 (s, 9H).  $^{13}\text{C}$  NMR (101 MHz,  $\text{CDCl}_3$ )  $\delta$  153.63, 149.00, 146.66, 138.64, 133.68, 133.54, 131.94, 129.86, 129.54, 128.92, 128.61, 126.86, 126.38, 116.27, 104.03, 85.34, 28.06, 21.36. ATR-FTIR ( $\text{cm}^{-1}$ ): 2980, 1741, 1681, 1554, 1460, 1440, 1351, 1311, 1154, 1102, 1078, 948, 769, 694; ESI-MS: calculated  $[\text{C}_{23}\text{H}_{24}\text{N}_2\text{O}_2 + \text{Na}]^+$ : 383.1730, found: 383.1728;

**(E)-tert-butyl 5-(2-(furan-2-yl)vinyl)-3-phenyl-1H-pyrazole-1-carboxylate (4gd)**

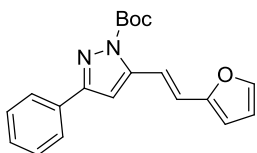

Total yield: 48 mg (72%);  $^1\text{H}$  NMR (400 MHz,  $\text{CDCl}_3$ )  $\delta$  7.88 – 7.82 (m, 2H), 7.72 – 7.65 (m, 1H), 7.50 – 7.44 (m, 2H), 7.39 – 7.28 (m, 5H), 7.26 – 7.21 (m, 1H), 7.07 (t,  $J$  = 11.5 Hz, 1H), 6.88 (s, 1H), 1.64 (s, 9H).  $^{13}\text{C}$  NMR (101 MHz,  $\text{CDCl}_3$ )  $\delta$  153.62, 152.40, 148.86, 146.07, 143.14, 131.88, 128.94, 128.61, 126.36, 120.82, 115.49, 111.86, 110.52, 103.83, 85.53, 28.01. ATR-FTIR ( $\text{cm}^{-1}$ ): 2983, 1740, 1459, 1347, 1309, 1242, 1152, 1102, 1078, 948, 768, 730, 693; ESI-MS: calculated  $[\text{C}_{20}\text{H}_{20}\text{N}_2\text{O}_3 + \text{Na}]^+$ : 359.1366, found: 359.1362;

**(E)-tert-butyl 5-styryl-3-(p-tolyl)-1H-pyrazole-1-carboxylate (4ae)**

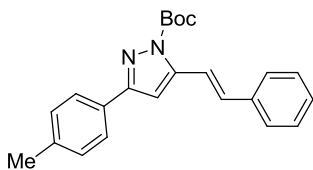

Total yield: 49 mg (68%);  $^1\text{H}$  NMR (400 MHz,  $\text{CDCl}_3$ )  $\delta$  7.74 (d,  $J$  = 8.1 Hz, 2H), 7.67 (d,  $J$  = 16.4 Hz, 1H), 7.48 – 7.43 (m, 2H), 7.31 (dd,  $J$  = 10.2, 4.6 Hz, 2H), 7.25 – 7.21 (m, 1H), 7.16 (d,  $J$  = 7.9 Hz, 2H), 7.04 (d,  $J$  = 16.4 Hz, 1H), 6.85 (d,  $J$  = 0.4 Hz, 1H), 2.30 (s, 3H), 1.63 (s, 9H).  $^{13}\text{C}$  NMR (101 MHz,  $\text{CDCl}_3$ )  $\delta$  153.70, 149.00, 146.33, 138.90, 136.48, 133.43,

129.32, 129.06, 128.81, 128.51, 126.91, 126.27, 117.36, 104.20, 85.33, 28.07, 21.39. **ATR-FTIR** ( $\text{cm}^{-1}$ ): 2982, 1741, 1440, 1333, 1311, 1239, 1155, 1102, 1067, 948, 799, 749, 693; **ESI-MS**: calculated  $[\text{C}_{23}\text{H}_{24}\text{N}_2\text{O}_2 + \text{Na}]^+$ : 383.1730, found: 383.1723;

**(E)-tert-butyl 3-(4-fluorophenyl)-5-styryl-1H-pyrazole-1-carboxylate (4ag)**

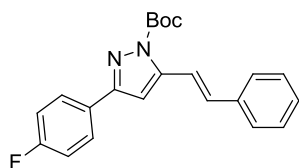

Total yield: 45 mg (62%);  **$^1\text{H}$  NMR (300 MHz,  $\text{CDCl}_3$ )**  $\delta$  7.86 – 7.79 (m, 2H), 7.67 (d,  $J = 16.4$  Hz, 1H), 7.50 – 7.43 (m, 2H), 7.36 – 7.28 (m, 2H), 7.27 – 7.23 (m, 1H), 7.09 – 7.01 (m, 3H), 6.83 (s, 1H), 1.63 (s, 9H).  **$^{13}\text{C}$  NMR (75 MHz,  $\text{CDCl}_3$ )**  $\delta$  152.71, 148.89, 146.59, 136.35, 133.69, 128.83, 128.61, 128.23, 128.12, 126.93, 117.15, 115.76, 115.47, 104.03, 85.53, 28.04.  **$^{19}\text{F}$  NMR (282 MHz,  $\text{CDCl}_3$ )**  $\delta$  -112.5. **ATR-FTIR** ( $\text{cm}^{-1}$ ): 2982, 1734, 1608, 1520, 1438, 1333, 1234, 1156, 1103, 1067, 842, 750, 693; **ESI-MS**: calculated  $[\text{C}_{22}\text{H}_{21}\text{N}_2\text{O}_2\text{F} + \text{Na}]^+$ : 387.1479, found: 387.1477;

**(E)-tert-butyl 3-(4-chlorophenyl)-5-styryl-1H-pyrazole-1-carboxylate (4ah)**

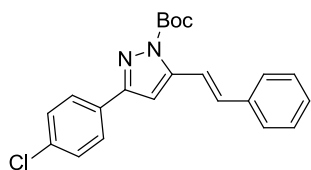

Total yield: 46 mg (61%);  **$^1\text{H}$  NMR (400 MHz,  $\text{CDCl}_3$ )**  $\delta$  7.76 – 7.70 (m, 2H), 7.66 (d,  $J = 16.7$  Hz, 1H), 7.51 – 7.43 (m, 4H), 7.35 – 7.28 (m, 2H), 7.24 (m, 1H), 7.05 (d,  $J = 16.4$  Hz, 1H), 6.84 (d,  $J = 0.4$  Hz, 1H), 1.63 (s, 9H).  **$^{13}\text{C}$  NMR (101 MHz,  $\text{CDCl}_3$ )**  $\delta$  152.52, 148.84, 146.65, 136.34, 134.82, 133.78, 130.44, 128.85, 128.64, 127.64, 126.94, 117.10, 104.07, 85.63, 28.04. **ATR-FTIR** ( $\text{cm}^{-1}$ ): 2981, 1743, 1432, 1331, 1310, 1154, 1102, 1091, 1066, 948, 837, 799, 750, 692; **ESI-MS**: calculated  $[\text{C}_{22}\text{H}_{21}\text{N}_2\text{O}_2\text{Cl} + \text{Na}]^+$ : 403.1184, found: 403.1177;

**(E)-tert-butyl 3-(4-bromophenyl)-5-styryl-1H-pyrazole-1-carboxylate (4ai)**

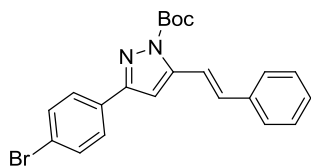

Total yield: 46 mg (55%);  **$^1\text{H}$  NMR (400 MHz,  $\text{CDCl}_3$ )**  $\delta$  7.76 – 7.70 (m, 2H), 7.66 (d,  $J = 16.7$  Hz, 1H), 7.51 – 7.43 (m, 4H), 7.35 – 7.28 (m, 2H), 7.24 (m, 1H), 7.05 (d,  $J = 16.4$  Hz, 1H), 6.84 (d,  $J = 0.4$  Hz, 1H), 1.63 (s, 9H).  **$^{13}\text{C}$  NMR (101 MHz,  $\text{CDCl}_3$ )**  $\delta$  152.55, 148.82, 146.66, 136.33, 133.81, 131.80, 130.89, 128.84, 128.65, 127.91, 126.94, 123.09, 117.08, 104.04, 85.65, 28.04. **ATR-FTIR** ( $\text{cm}^{-1}$ ): 2982, 1744, 1431, 1331, 1310, 1156, 1102, 1072, 1011, 948, 800, 750, 692; **ESI-MS**: calculated  $[\text{C}_{22}\text{H}_{21}\text{N}_2\text{O}_2\text{Br} + \text{Na}]^+$ : 449.0659, found: 449.0656;

**(E)-tert-butyl 3-(naphthalen-2-yl)-5-styryl-1H-pyrazole-1-carboxylate (4ak)**

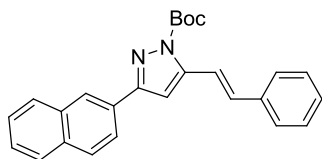

Total yield: 46 mg (58%);  $^1\text{H}$  NMR (400 MHz,  $\text{CDCl}_3$ )  $\delta$  8.29 (s, 1H), 8.03 (dd,  $J$  = 8.5, 1.7 Hz, 1H), 7.83 (dd,  $J$  = 8.8, 3.8 Hz, 2H), 7.80 – 7.75 (m, 1H), 7.73 – 7.67 (m, 1H), 7.50 – 7.46 (m, 2H), 7.45 – 7.40 (m, 2H), 7.32 (dd,  $J$  = 10.2, 4.6 Hz, 2H), 7.27 – 7.22 (m, 1H), 7.10 (d,  $J$  = 16.4 Hz, 1H), 7.02 (s, 1H), 1.66 (s, 9H).  $^{13}\text{C}$  NMR (101 MHz,  $\text{CDCl}_3$ )  $\delta$  153.61, 148.97, 146.55, 136.45, 133.64, 133.36, 129.31, 128.84, 128.58, 128.39, 128.34, 127.79, 126.94, 126.41, 126.35, 125.61, 124.14, 117.30, 104.47, 85.54, 28.09. ATR-FTIR ( $\text{cm}^{-1}$ ): 3057, 2982, 1741, 1367, 1321, 1155, 1099, 947, 802, 749, 692; ESI-MS: calculated  $[\text{C}_{26}\text{H}_{24}\text{N}_2\text{O}_2 + \text{Na}]^+$ : 419.1730, found: 419.1717;

**(E)-tert-butyl 5-styryl-3-(m-tolyl)-1H-pyrazole-1-carboxylate (4am)**

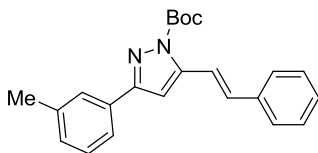

Total yield: 48 mg (67%);  $^1\text{H}$  NMR (300 MHz,  $\text{CDCl}_3$ )  $\delta$  7.74 – 7.60 (m, 3H), 7.49 – 7.43 (m, 2H), 7.35 – 7.28 (m, 2H), 7.27 – 7.20 (m, 2H), 7.12 (d,  $J$  = 7.6 Hz, 1H), 7.05 (d,  $J$  = 16.4 Hz, 1H), 6.87 (d,  $J$  = 0.6 Hz, 1H), 2.34 (s, 3H), 1.64 (s, 9H).  $^{13}\text{C}$  NMR (75 MHz,  $\text{CDCl}_3$ )  $\delta$  153.78, 148.97, 146.33, 138.28, 136.45, 133.47, 131.71, 129.75, 128.82, 128.53, 128.50, 126.98, 126.91, 123.51, 117.32, 104.35, 85.42, 28.06, 21.43. ATR-FTIR ( $\text{cm}^{-1}$ ): 2982, 1742, 1555, 1333, 1311, 1239, 1155, 1104, 1076, 963, 787, 693; ESI-MS: calculated  $[\text{C}_{23}\text{H}_{24}\text{N}_2\text{O}_2 + \text{Na}]^+$ : 383.1730, found: 383.1725;

#### 4. X-ray Crystallography data

**X-Ray diffraction:** Data sets were collected with a D8 Venture Dual Source 100 CMOS diffractometer. Programs used: data collection: APEX2 V2014.5-0 (Bruker AXS Inc., 2014);<sup>2a</sup> cell refinement: SAINT V8.34A (Bruker AXS Inc., 2013);<sup>2a</sup> data reduction: SAINT V8.34A (Bruker AXS Inc., 2013);<sup>2a</sup> absorption correction, SADABS V2014/2 (Bruker AXS Inc., 2014);<sup>2a</sup> structure solution SHELXT-2014 (Sheldrick, 2014);<sup>2b</sup> structure refinement SHELXL-2014 (Sheldrick, 2014)<sup>2b</sup> and graphics, XP (Bruker AXS Inc., 2014).<sup>2b</sup>  $R$ -values are given for observed reflections, and  $wR^2$  values are given for all reflections.

**X-ray crystal structure analysis of 3gd:** formula  $\text{C}_{20}\text{H}_{22}\text{N}_2\text{O}_4$ ,  $M$  = 354.39, colourless crystal, 0.191 x 0.178 x 0.067 mm,  $a$  = 5.8916(3),  $b$  = 11.8596(5),  $c$  = 25.8111(11) Å,  $V$  = 1801.8(1) Å<sup>3</sup>,  $\rho_{\text{calc}}$  = 1.306 gcm<sup>-3</sup>,  $\mu$  = 0.749 mm<sup>-1</sup>, empirical absorption correction (0.870 ≤  $T$  ≤ 0.952),  $Z$  = 4,

monoclinic, space group  $P2_1$  (No. 4),  $\lambda = 1.54178 \text{ \AA}$ ,  $T = 100(2) \text{ K}$ ,  $\omega$  and  $\phi$  scans, 15935 reflections collected, 5175 independent ( $R_{int} = 0.087$ ) and 4069 observed reflections [ $I > 2\sigma(I)$ ], 472 refined parameters,  $R = 0.054$ ,  $wR^2 = 0.122$ , max. (min.) residual electron density  $0.33$  ( $-0.20$ )  $\text{e.\AA}^{-3}$ , hydrogen atoms calculated and refined as riding atoms. Flack parameter:  $0.0(2)$ .

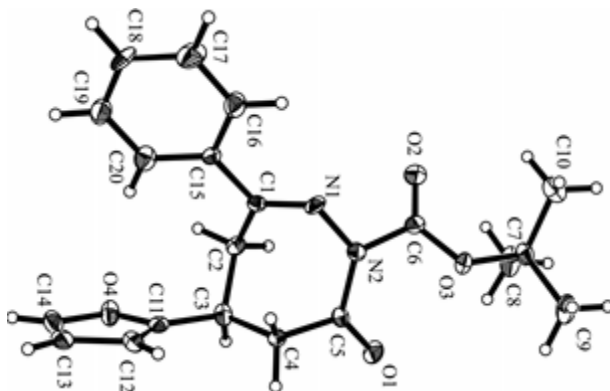

Crystal structure of compound **3gd**.

Only one molecule from two found in the asymmetric unit is shown.

(Thermal ellipsoids are shown with 50% probability.)

## 5. Synthetic Transformation of **3ad**

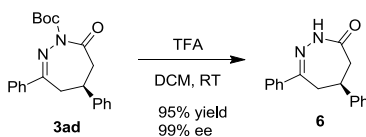

To a cooled ( $0 \text{ }^{\circ}\text{C}$ ) solution of **3ad** (36.4 mg, 0.1 mmol) in  $\text{CH}_2\text{Cl}_2$  (6 mL), 4.0 equiv of TFA (31  $\mu\text{L}$ , 0.4 mmol) was added. The solution was then allowed to warm to room temperature, and then stirred for 4 h. After 4 h, sat.  $\text{NaHCO}_3$  solution was added and the organic layer was extracted with  $\text{CH}_2\text{Cl}_2$ , dried over  $\text{Na}_2\text{SO}_4$ . After removing solvents, the residue was purified by column chromatography to give the product **6** in 95% yield (25 mg).

**$^1\text{H}$  NMR (400 MHz,  $\text{CDCl}_3$ )**  $\delta$  8.52 (s, 1H), 7.71 – 7.59 (m, 2H), 7.41 – 7.31 (m, 3H), 7.29 – 7.23 (m, 4H), 7.23 – 7.18 (m, 1H), 3.74 (m, 1H), 3.18 (dd,  $J = 13.2, 6.7 \text{ Hz}$ , 1H), 3.03 (dd,  $J = 13.2, 9.7 \text{ Hz}$ , 1H), 2.76 (dd,  $J = 13.4, 8.0 \text{ Hz}$ , 1H), 2.66 (dd,  $J = 13.4, 5.2 \text{ Hz}$ , 1H).  **$^{13}\text{C}$  NMR (101 MHz,  $\text{CDCl}_3$ )**  $\delta$  171.80, 166.80, 143.50, 136.18, 130.62, 128.97, 128.74, 127.35, 126.73, 126.63, 45.48, 39.61, 36.09. **ATR-FTIR ( $\text{cm}^{-1}$ )**: 3211, 3084, 2914, 1651, 1447, 1341, 1305, 1159, 1021,

755, 693; **ESI-MS**: calculated  $[\text{C}_{17}\text{H}_{16}\text{N}_2\text{O} + \text{Na}]^+$ : 287.1155, found: 287.1152; The product was analyzed by HPLC to determine the enantiomeric excess: 99% *ee* (AD-H, hexane/*i*-PrOH = 70/30, detector: 254 nm, flow rate: 1 mL/min),  $t_1(\text{major}) = 7.5$  min,  $t_2(\text{minor}) = 12.1$  min.

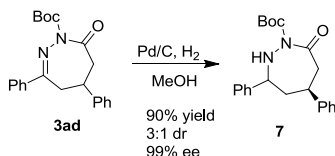

A suspension of Pd/C (20 mg) and **3ad** (36.4 mg, 0.1 mmol) in MeOH (2.5 mL) was stirred at RT under 1 atm hydrogen atmosphere. After being stirred overnight, the mixture was filtrated through a pad of Celite and the filtration was concentrated in vacuo, the residue was purified by column chromatography on silica gel to afford the desired the product **7** in 90% yield (33 mg, d.r. = 3:1, *ee* = 99%).

Major isomer:  **$^1\text{H}$  NMR (400 MHz,  $\text{CDCl}_3$ )**  $\delta$  7.34 – 7.12 (m, 10H), 5.07 (s, 1H), 3.76 (m, 2H), 3.11 – 3.02 (m, 1H), 2.60 (d,  $J = 12.6$  Hz, 1H), 2.21 – 2.10 (m, 1H), 2.03 (d,  $J = 13.6$  Hz, 1H), 1.46 (s, 9H).  **$^{13}\text{C}$  NMR (101 MHz,  $\text{CDCl}_3$ )**  $\delta$  172.68, 172.52, 150.93, 150.60, 145.13, 139.93, 127.84, 127.71, 125.79, 125.45, 83.54, 65.46, 58.66, 44.24, 39.96, 27.03. **ATR-FTIR ( $\text{cm}^{-1}$ )**: 2982, 1722, 1493, 1369, 1239, 1147, 1098, 1030, 734, 699; **ESI-MS**: calculated  $[\text{C}_{22}\text{H}_{26}\text{N}_2\text{O}_3 + \text{Na}]^+$ : 389.1836, found: 389.1828; The product was analyzed by HPLC to determine the enantiomeric excess: 99% *ee* (AD-H, hexane/*i*-PrOH = 85/15, detector: 254 nm, flow rate: 1 mL/min),  $t_1(\text{major}) = 6.2$  min,  $t_2(\text{minor}) = 6.7$  min.

## 6 References

1. (a) Chen, J.-R.; Dong, W.-R.; Candy, M.; Pan, F.-F.; Jörres, M.; Bolm, C. *J. Am. Chem.Soc.* **2012**, *134*, 6924; (b) South, M. S.; Jakuboski, T. L.; Westmeyer, M. D.; Dukesharer, D. R. *J. Org. Chem.* **1996**, *61*, 8921.
2. (a) Bruker APEX2, SAINT and SADABS 2013. Bruker AXS Inc., Madison, Wisconsin, USA; (b). SHELXT und SHELXL Sheldrick, G. M. *Acta Cryst.* **2008**. A64, 112–122.

## 7 NMR spectra

### tert-butyl 2-(2-chloro-1-phenylethylidene)hydrazinecarboxylate (2d)

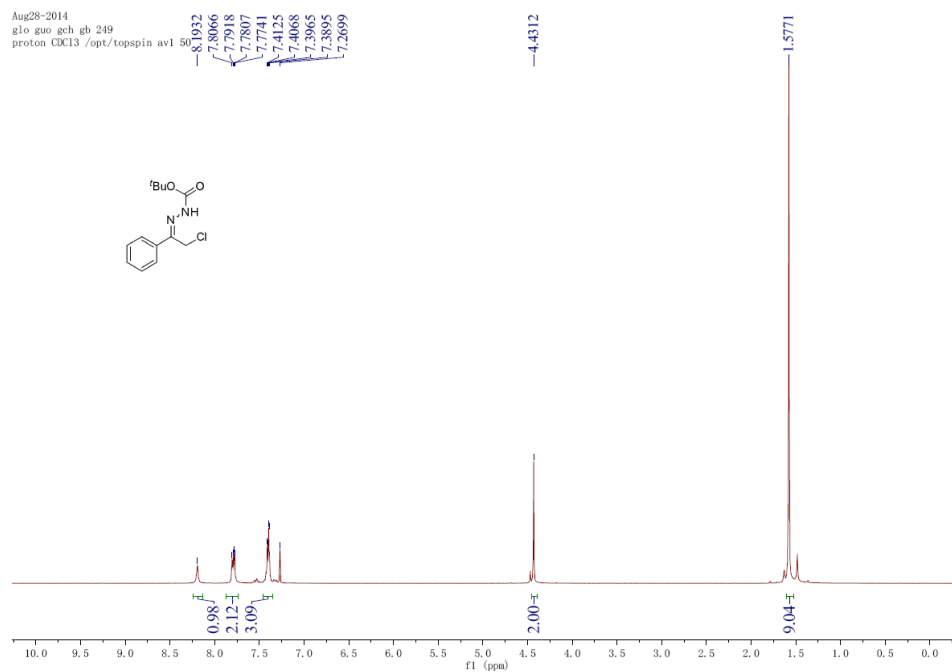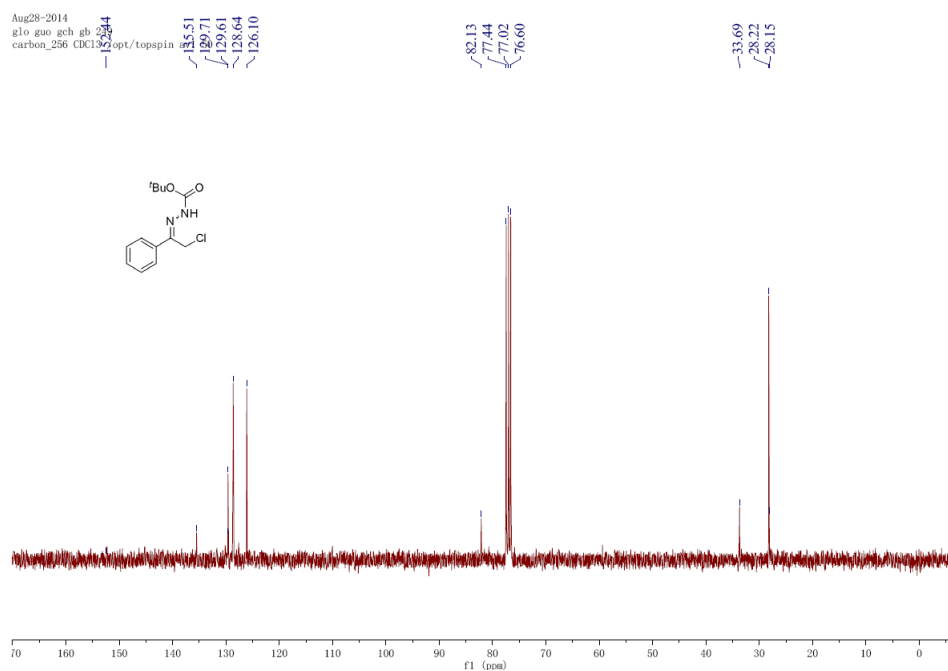

**tert-butyl 2-(2-chloro-1-(p-tolyl)ethylidene)hydrazinecarboxylate (2e)**

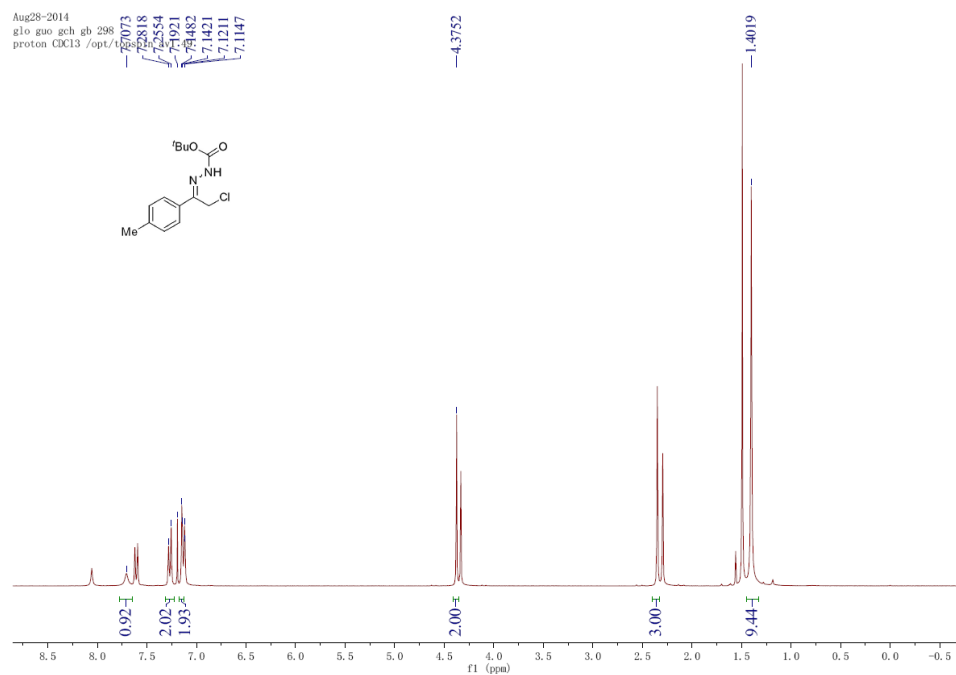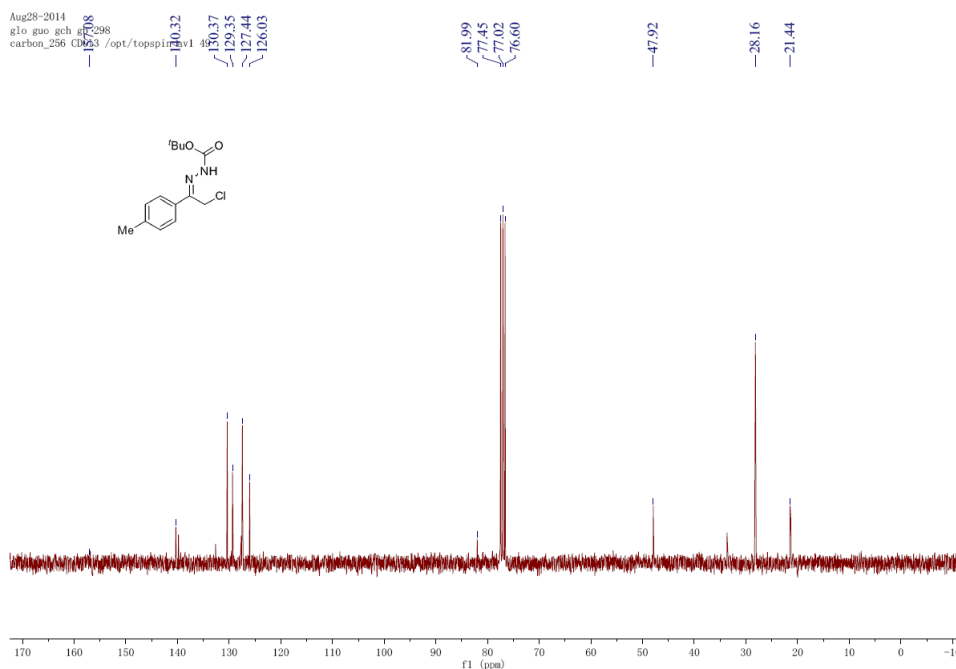

**tert-butyl 2-(2-chloro-1-(4-methoxyphenyl)ethylidene)hydrazinecarboxylate (2f)**

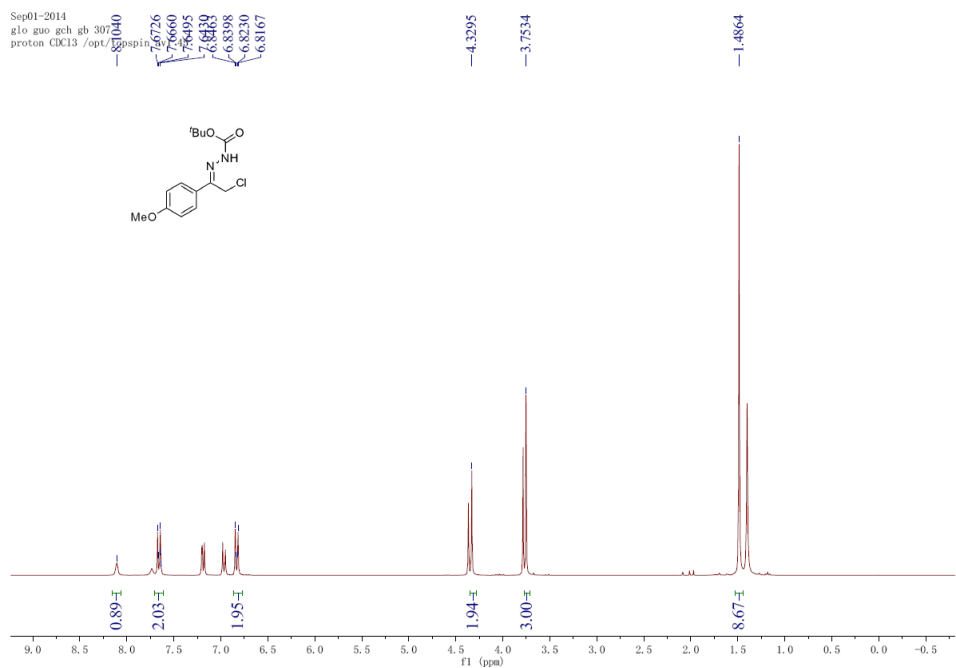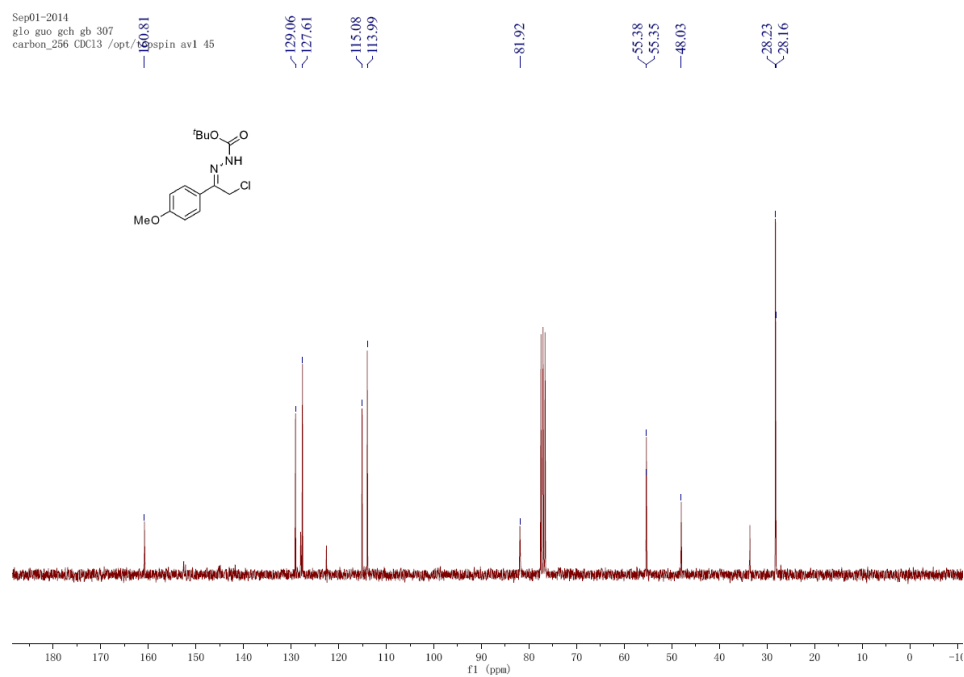



**tert-butyl 2-(2-chloro-1-(4-fluorophenyl)ethylidene)hydrazinecarboxylate (2g)**

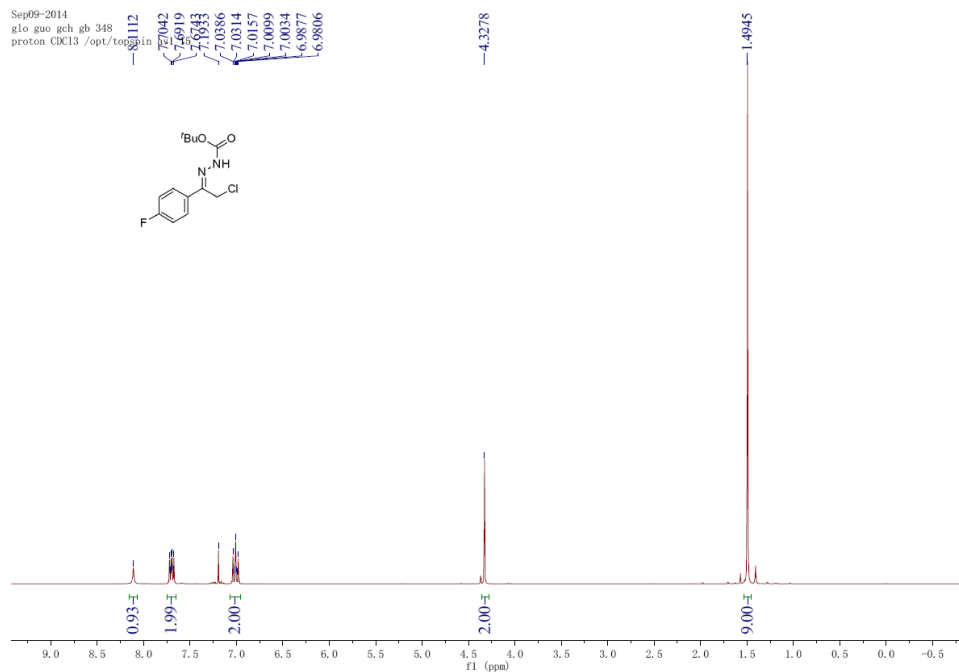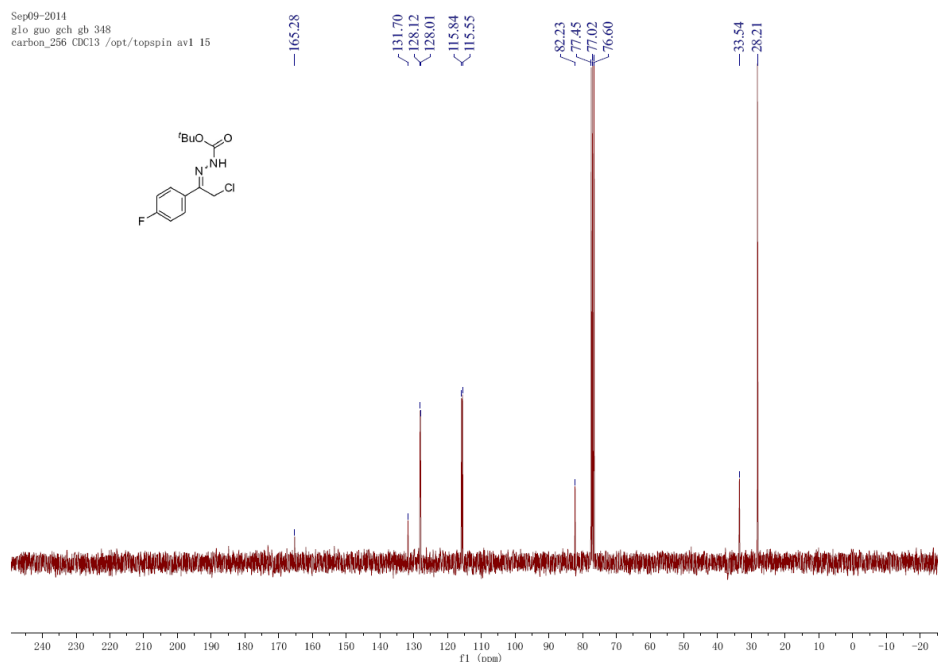

**tert-butyl 2-(2-chloro-1-(4-chlorophenyl)ethylidene)hydrazinecarboxylate (2h)**

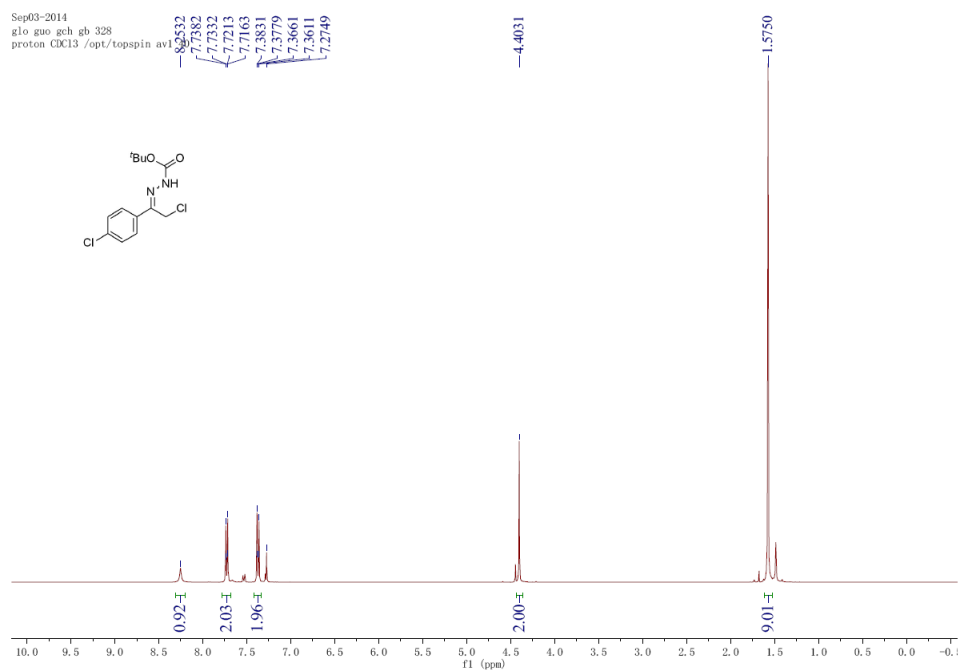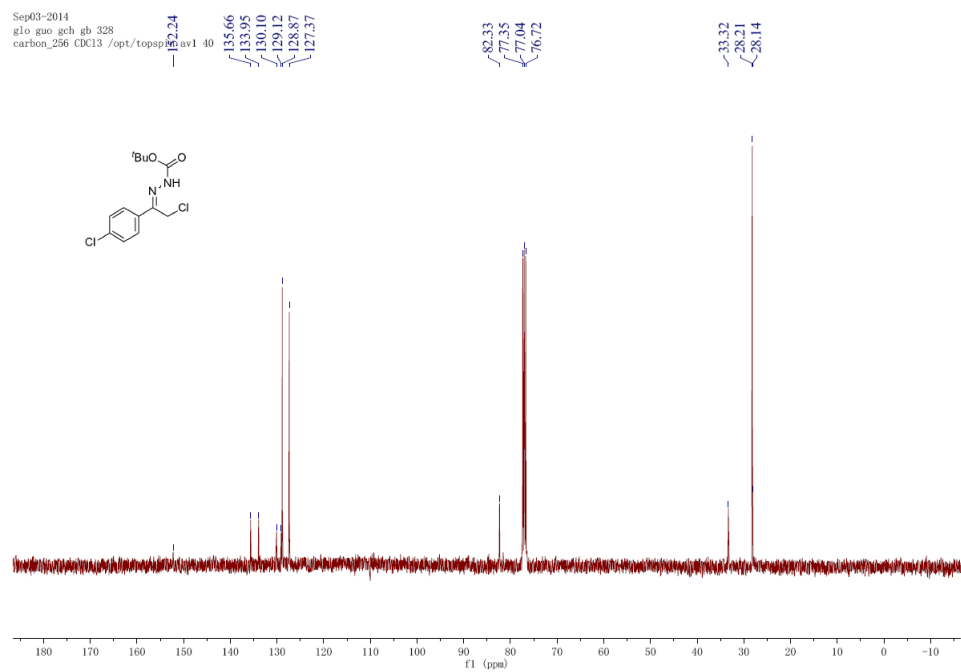

**tert-butyl 2-(1-(4-bromophenyl)-2-chloroethylidene)hydrazinecarboxylate (2i)**

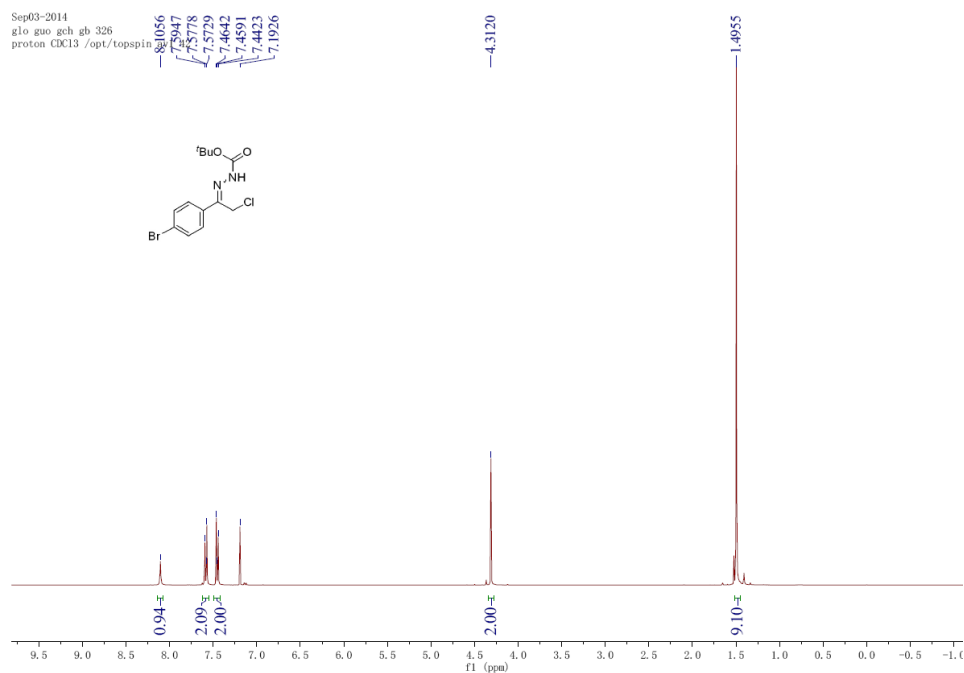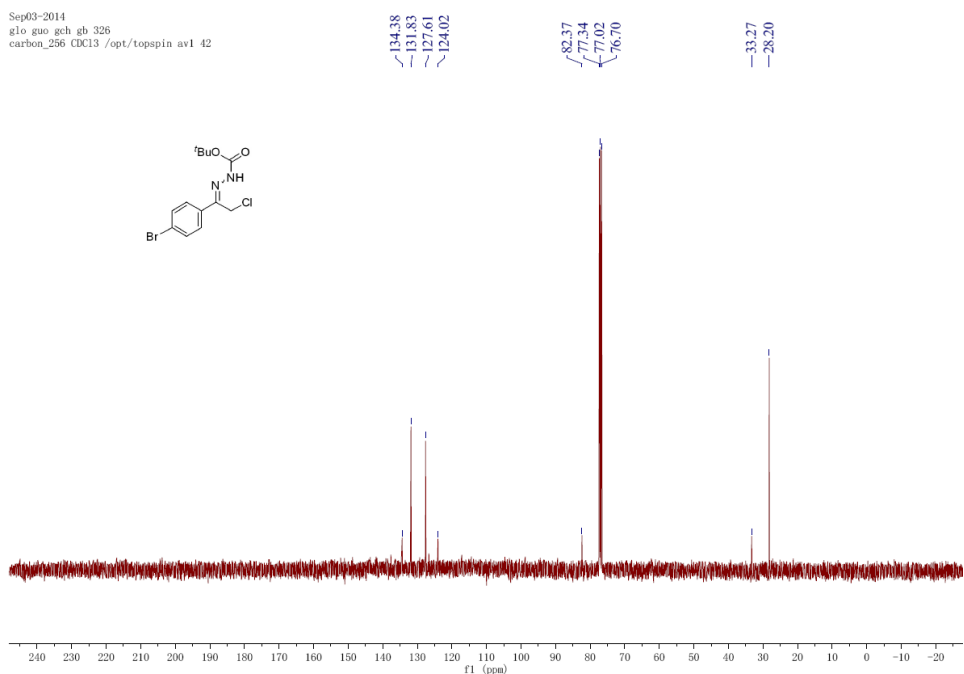

**tert-butyl 2-(2-chloro-1-(4-(trifluoromethyl)phenyl)ethylidene)hydrazinecarboxylate (2j)**

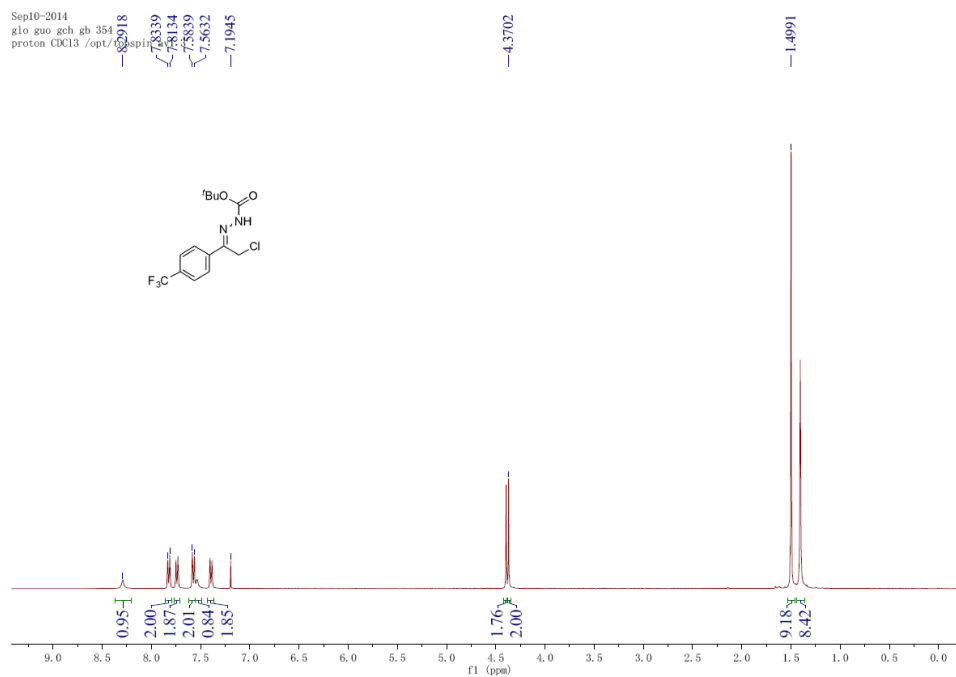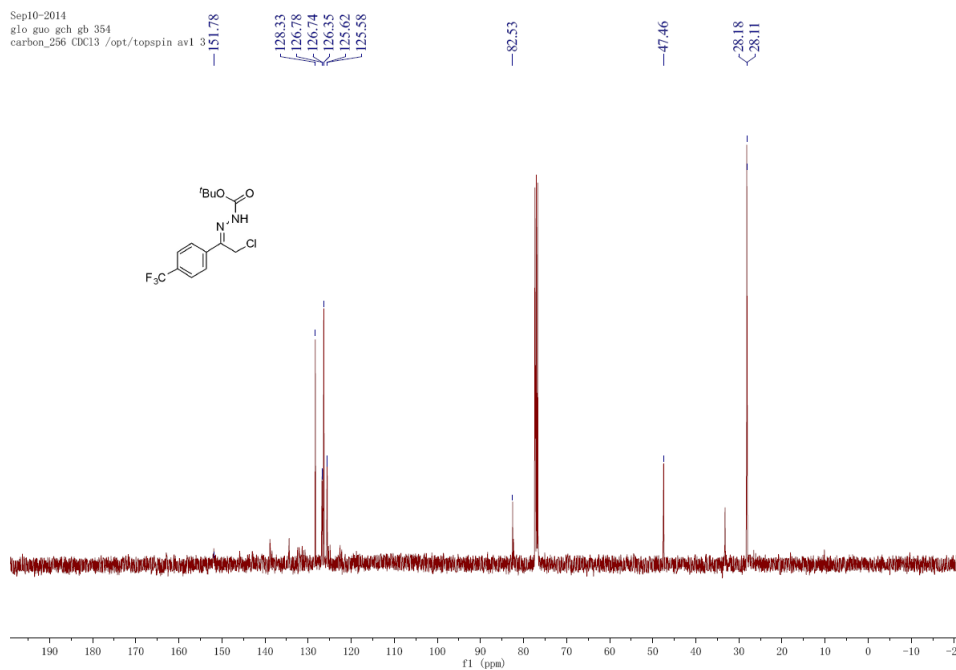

**tert-butyl 2-(2-chloro-1-(naphthalen-2-yl)ethylidene)hydrazinecarboxylate (2k)**

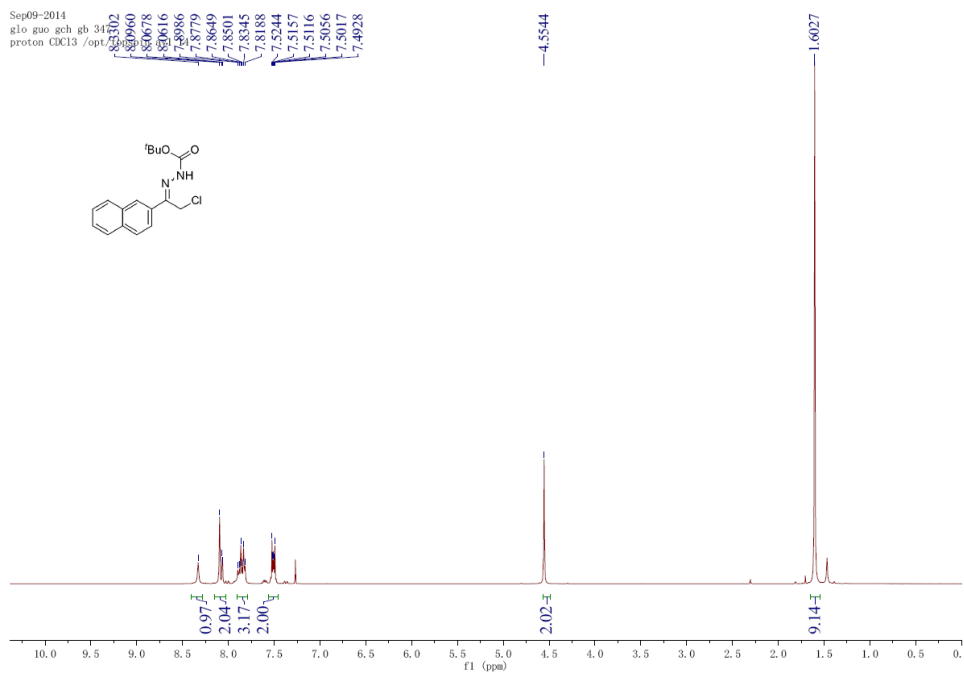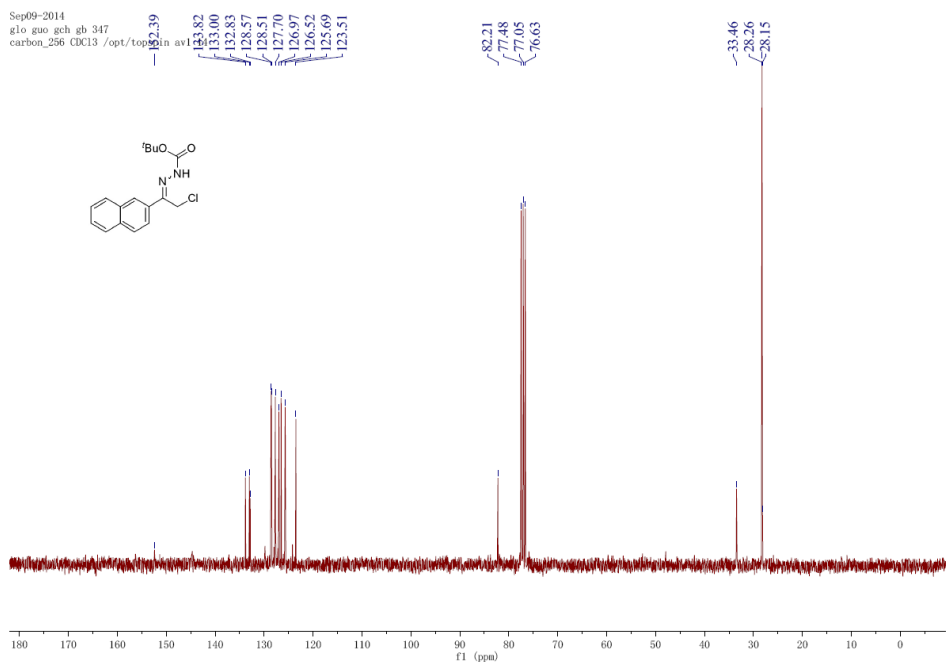

**tert-butyl 2-(1-(3-bromophenyl)-2-chloroethylidene)hydrazinecarboxylate (2l)**

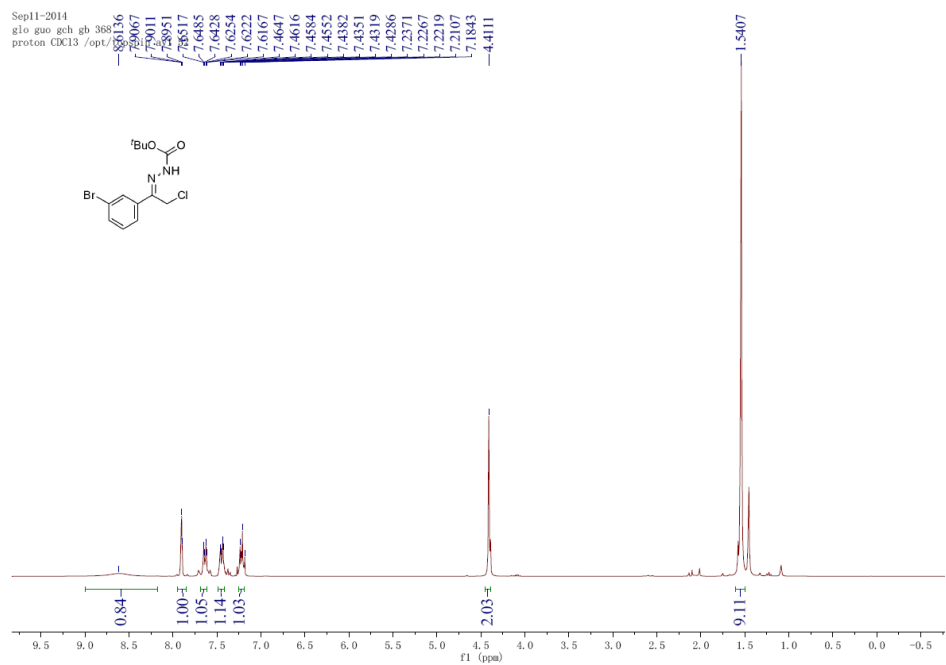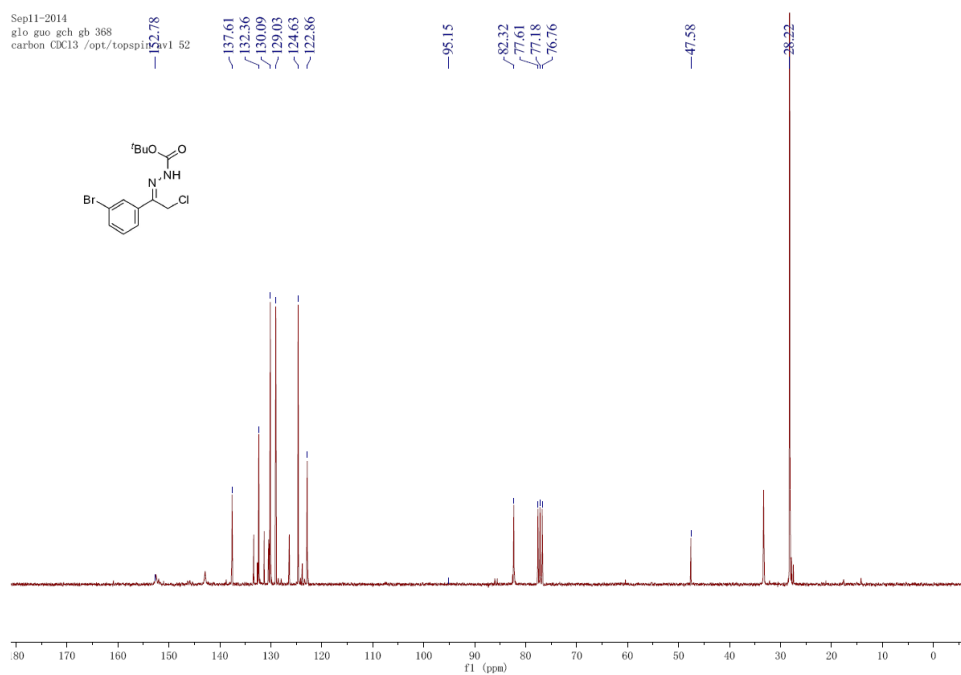

**tert-butyl 2-(2-chloro-1-(m-tolyl)ethylidene)hydrazinecarboxylate (2m)**

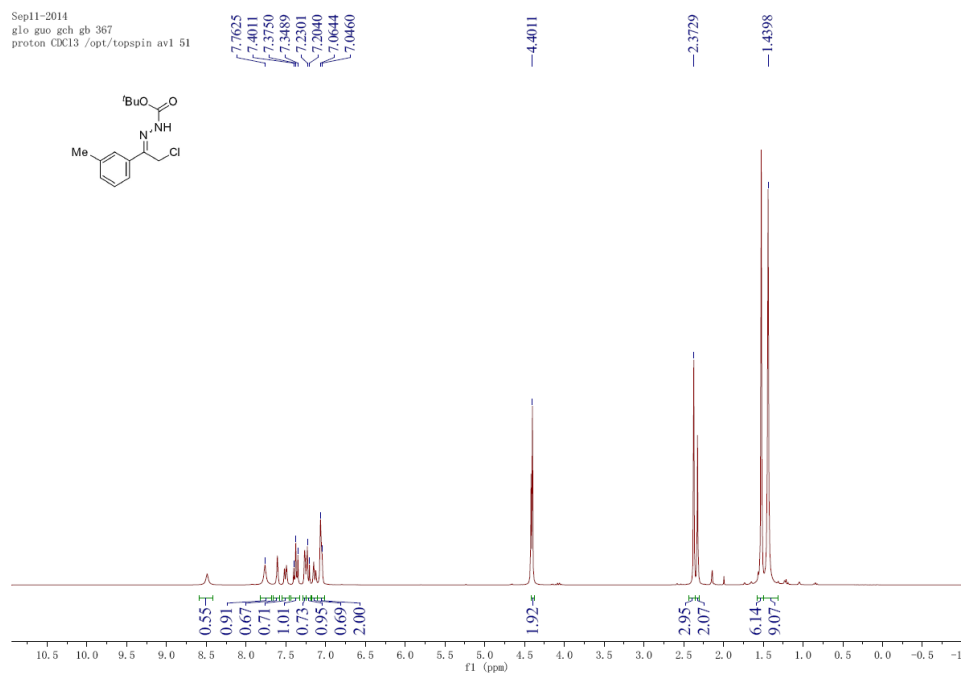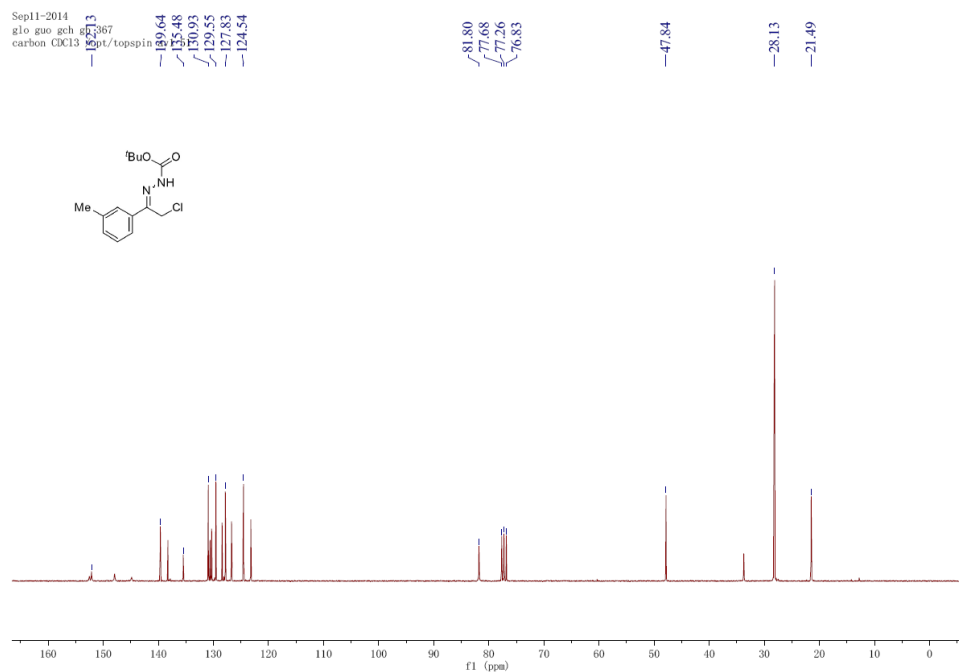

# tert-butyl 2-(1-chloro-3,3-dimethylbutan-2-ylidene)hydrazinecarboxylate (2n)

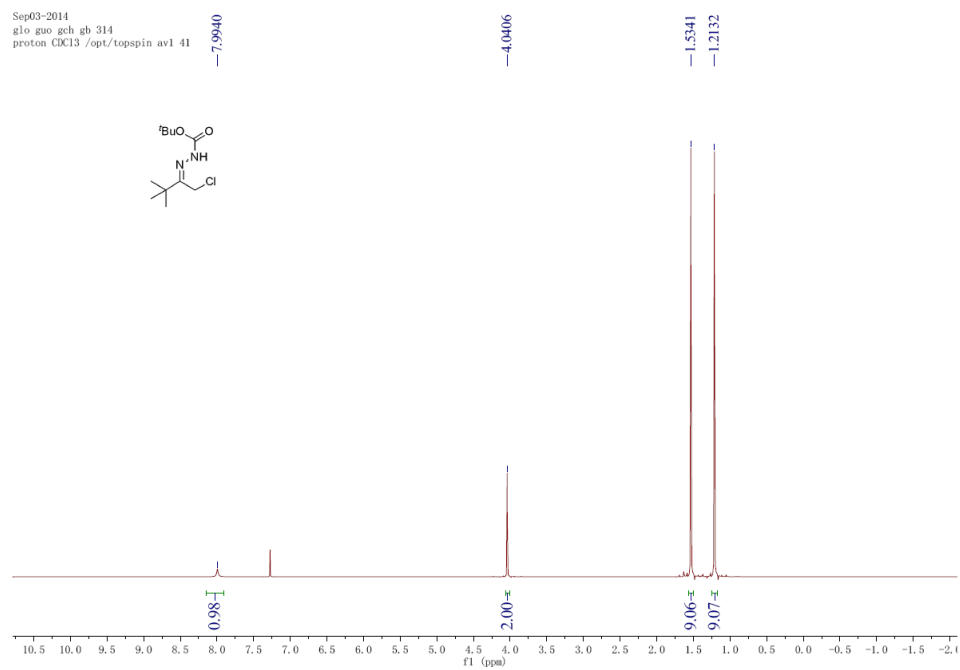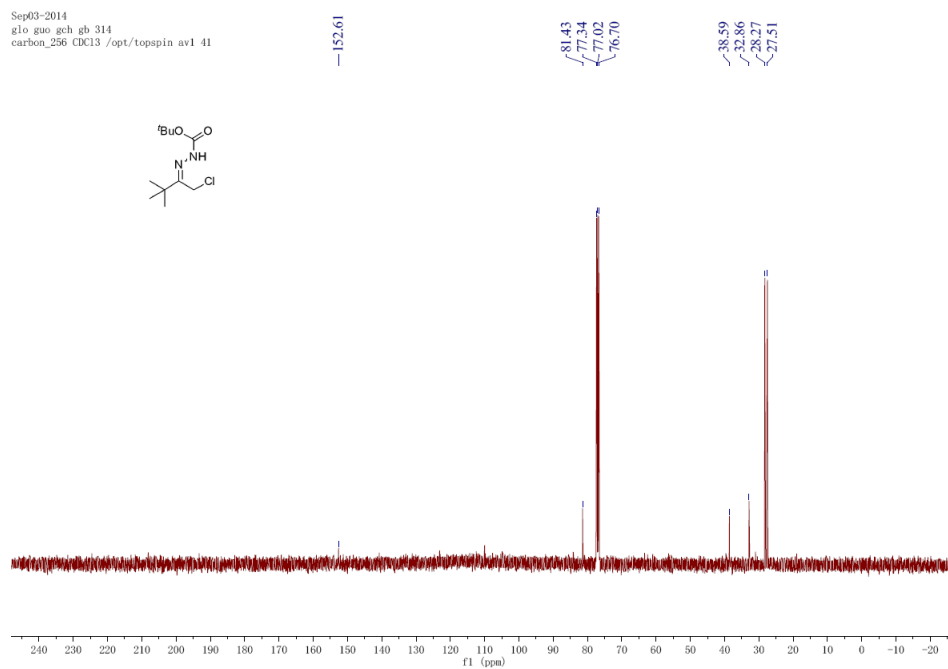



**tert-butyl 2-(2-chloro-3,4-dihydronaphthalen-1(2H)-ylidene)hydrazinecarboxylate (2o)**

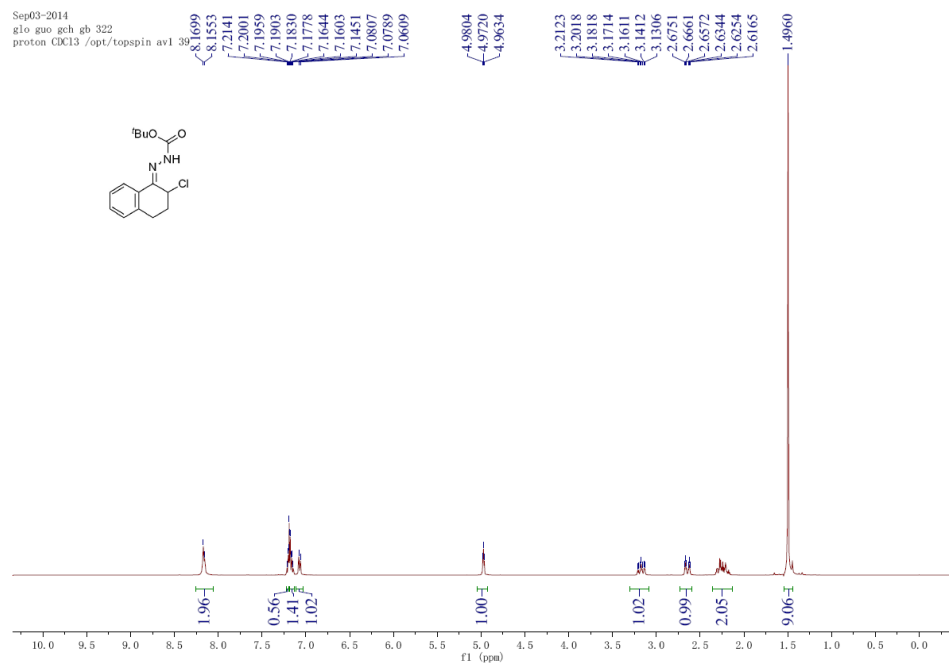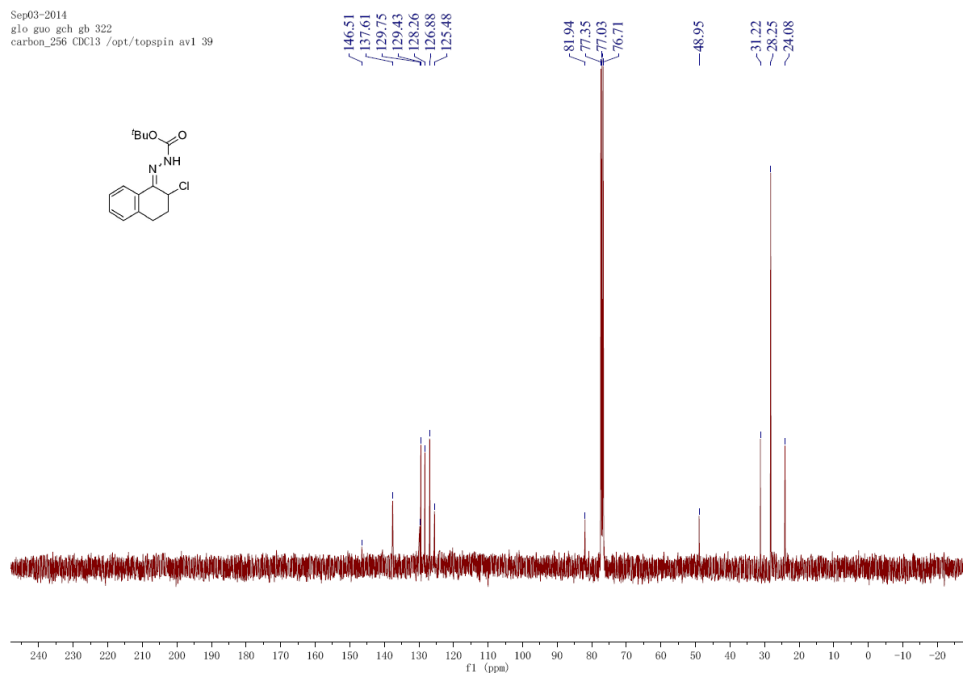

**tert-butyl 2-(3-chlorochroman-4-ylidene)hydrazinecarboxylate (2p)**

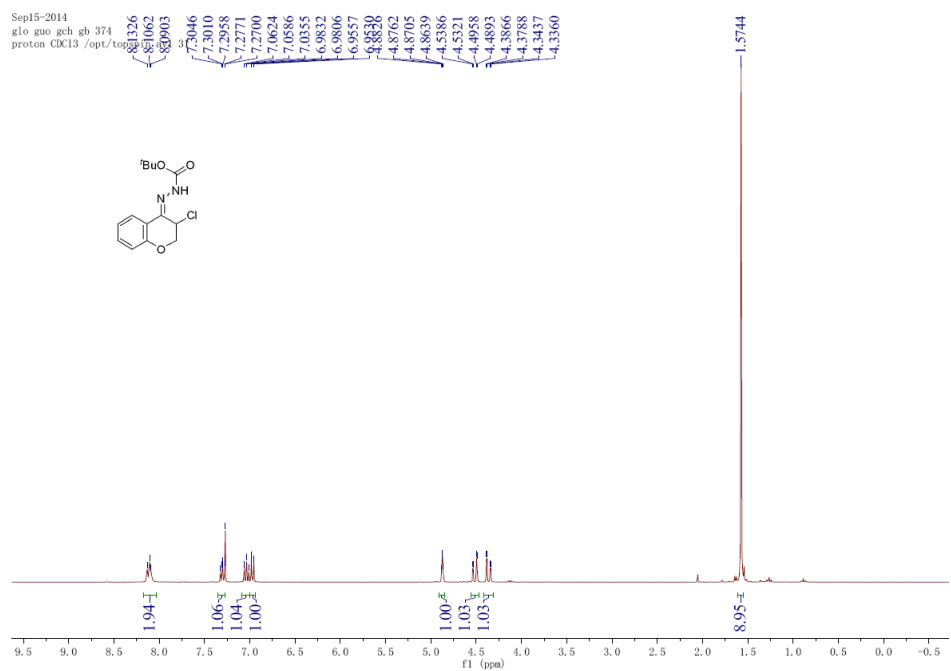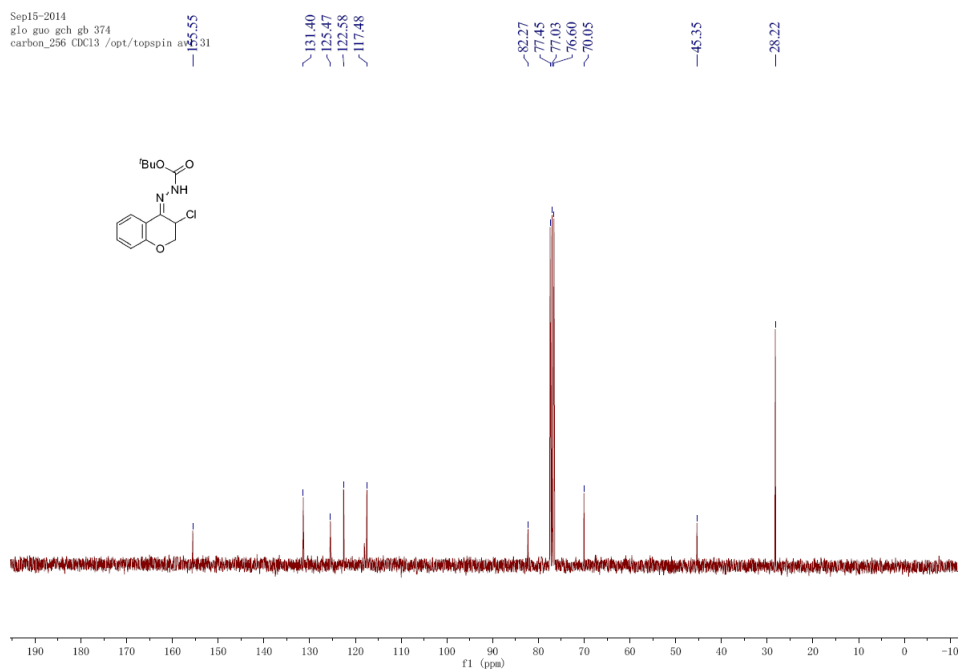

<sup>1</sup>H NMR spectrum of **3ad**

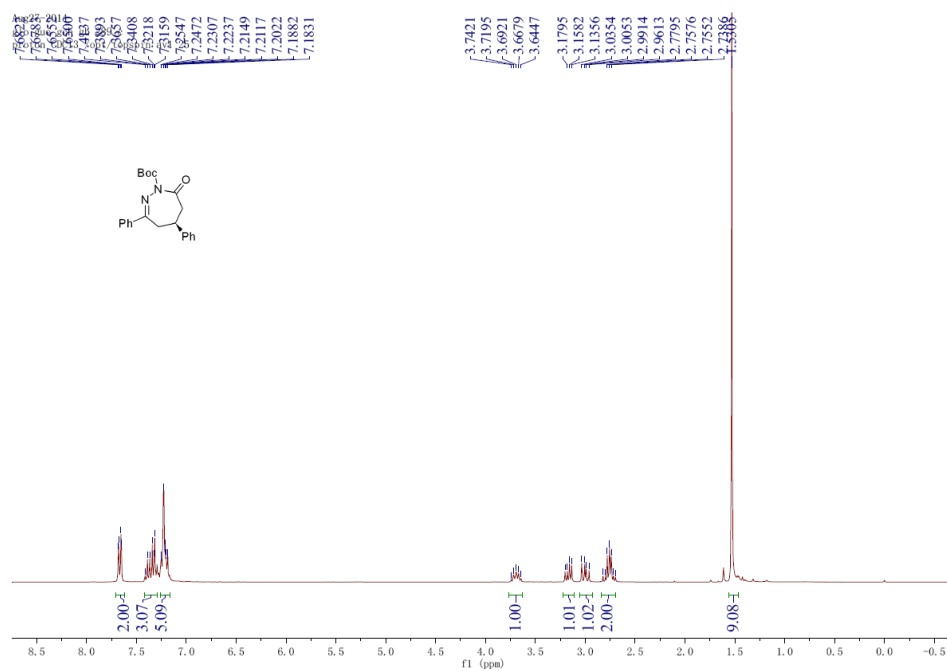

<sup>13</sup>C NMR spectrum of **3ad**

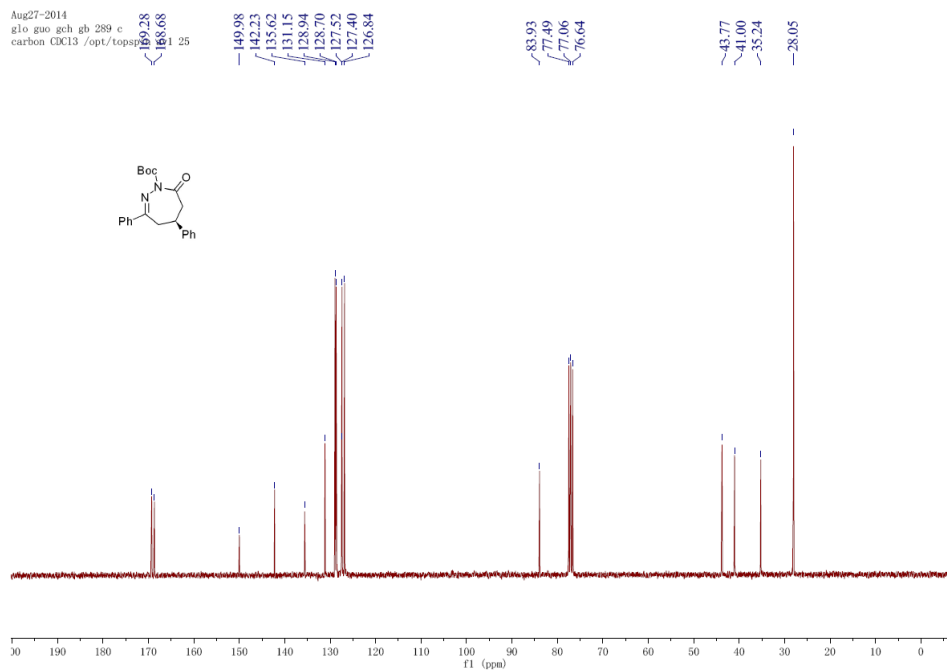

<sup>1</sup>H NMR spectrum of **3bd**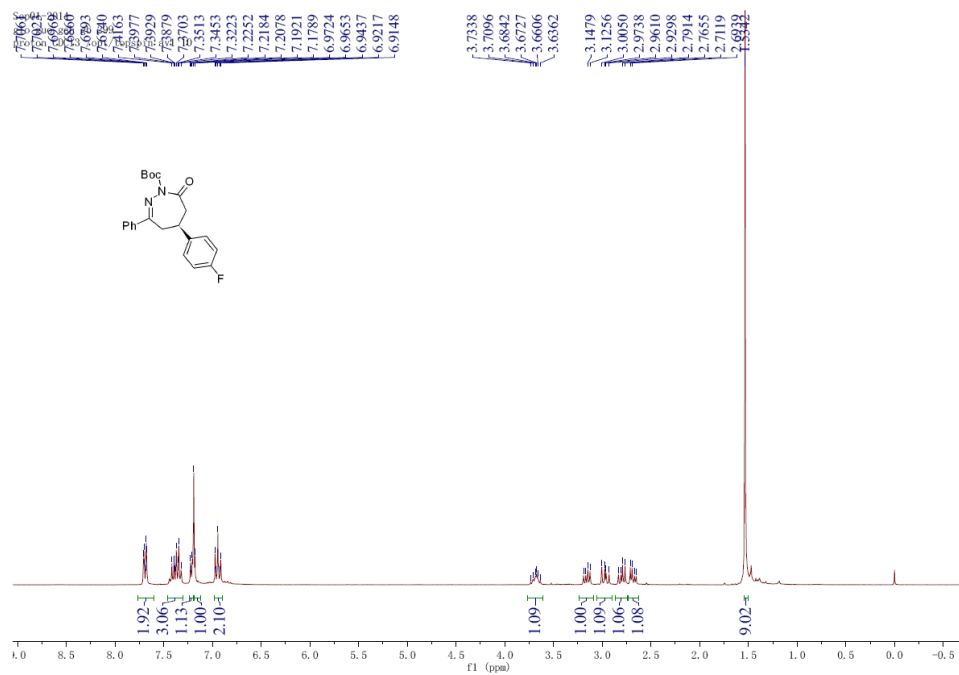

<sup>13</sup>C NMR spectrum of **3bd**

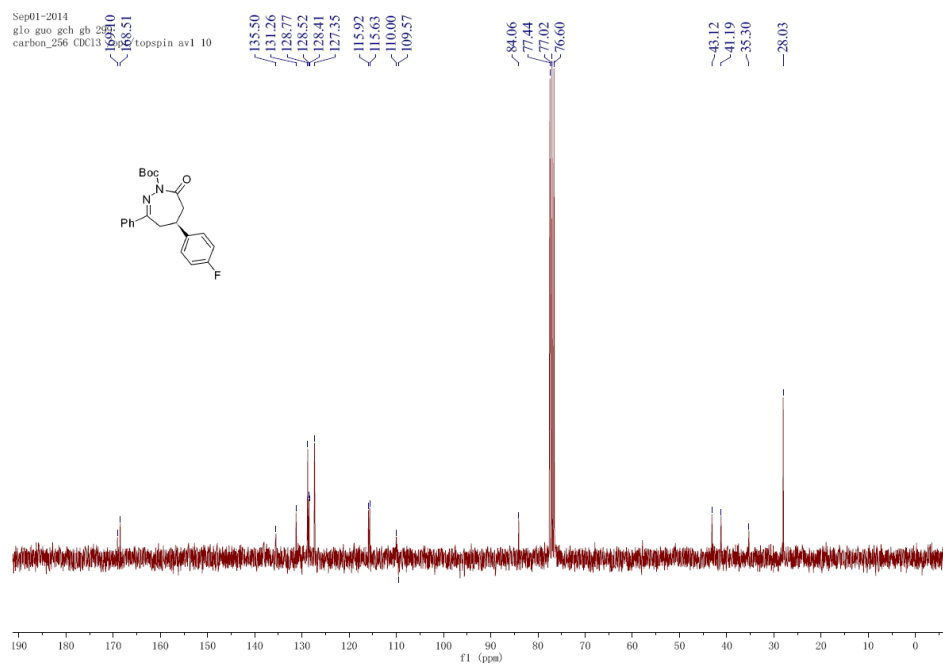

<sup>1</sup>H NMR spectrum of **3cd**

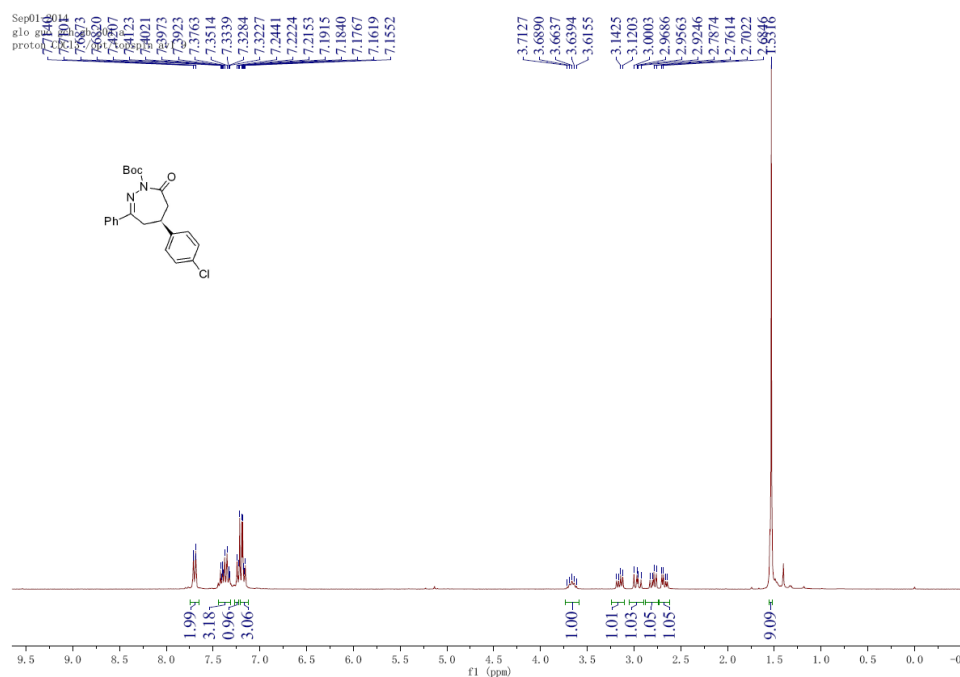

<sup>13</sup>C NMR spectrum of **3cd**

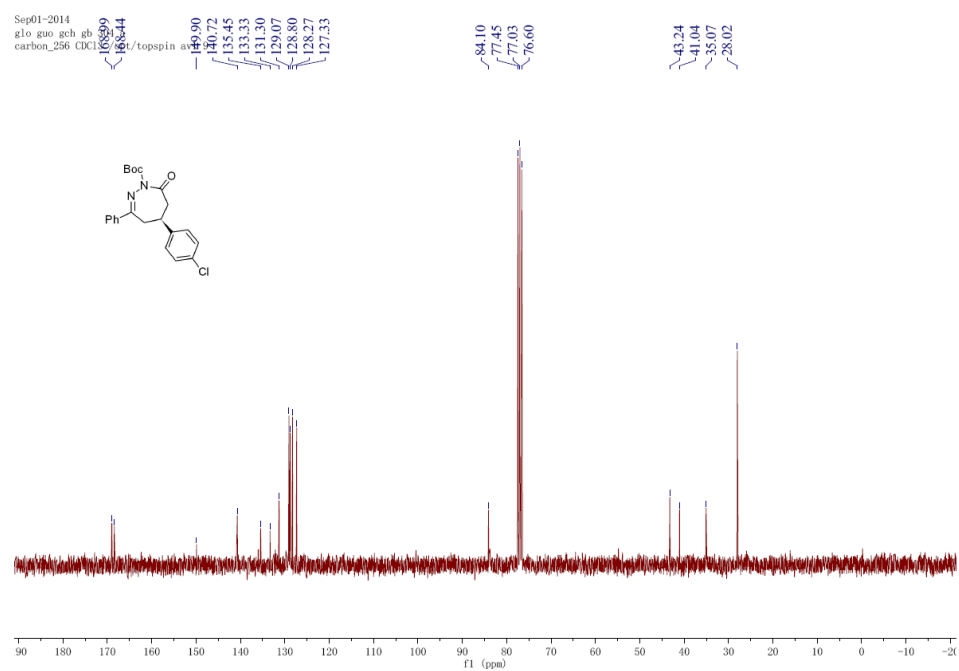

<sup>1</sup>H NMR spectrum of **3dd**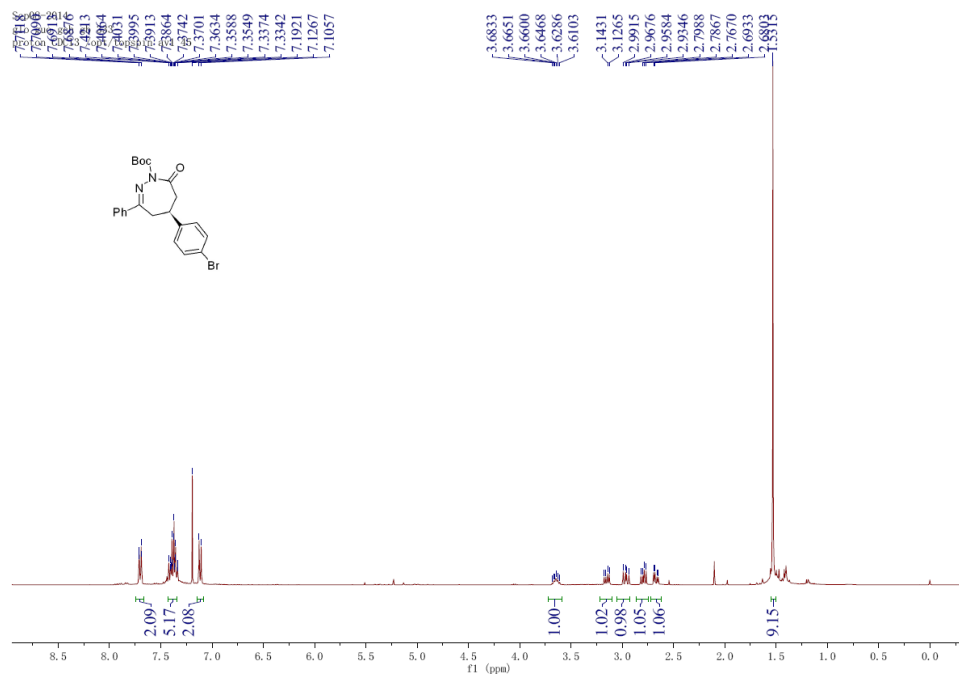 $^{13}\text{C}$  NMR spectrum of **3dd**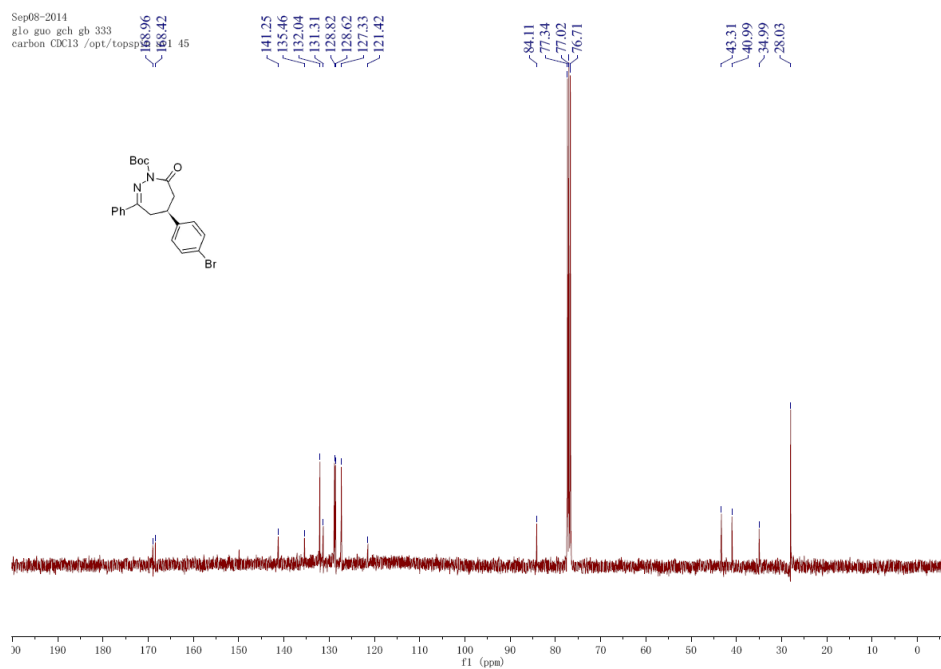

# <sup>1</sup>H NMR spectrum of **3ed**

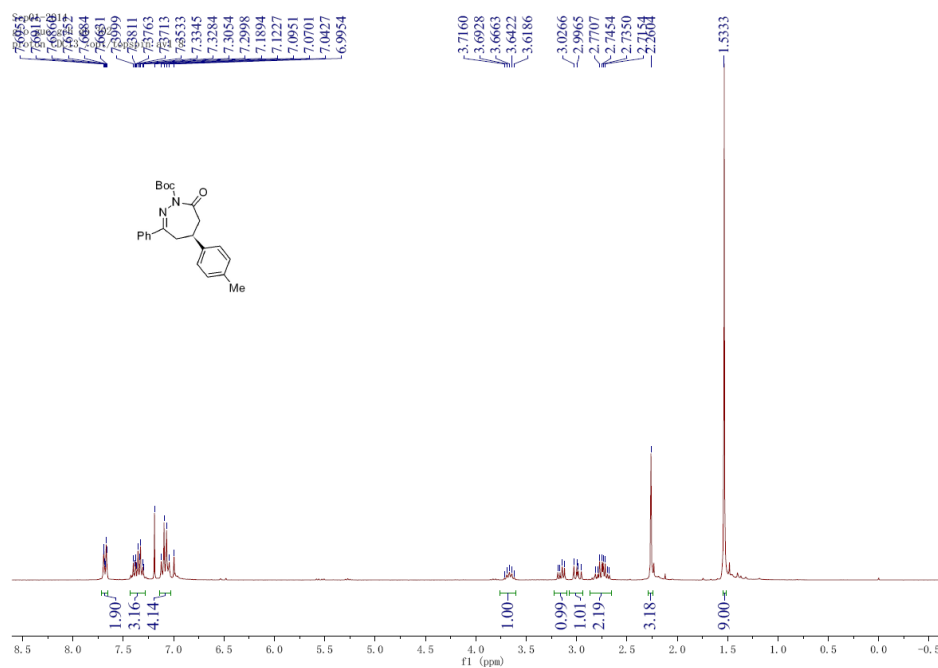

# <sup>13</sup>C NMR spectrum of **3ed**

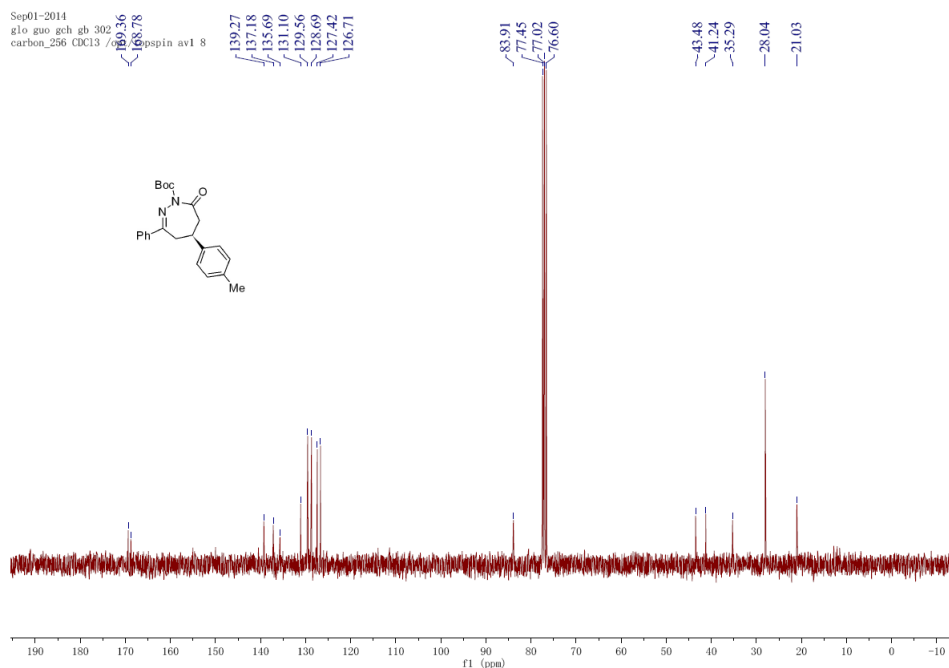

<sup>1</sup>H NMR spectrum of **3fd**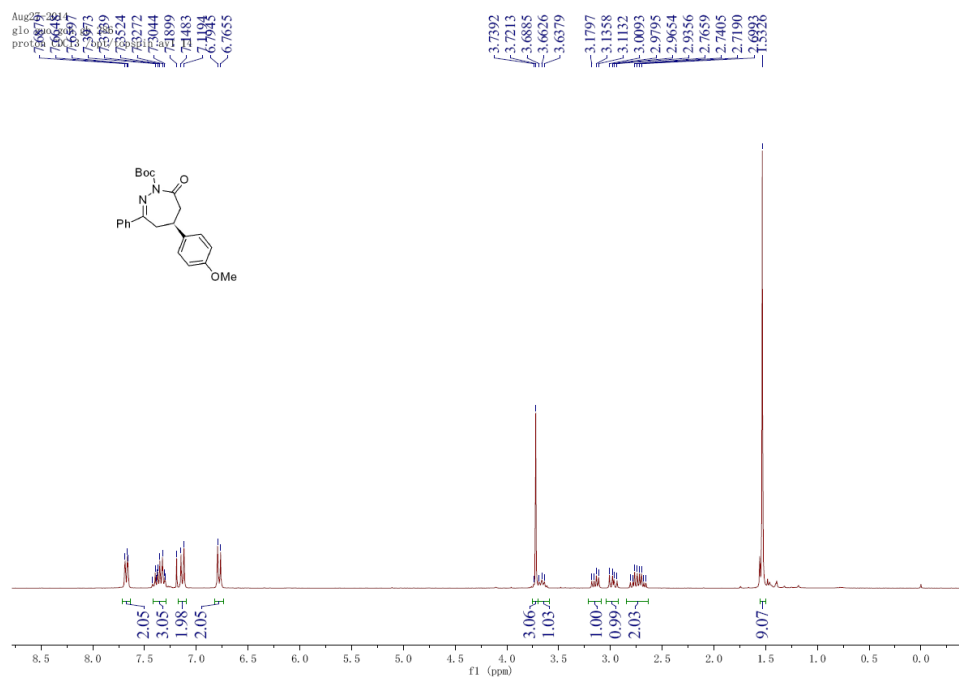 $^{13}\text{C}$  NMR spectrum of **3fd**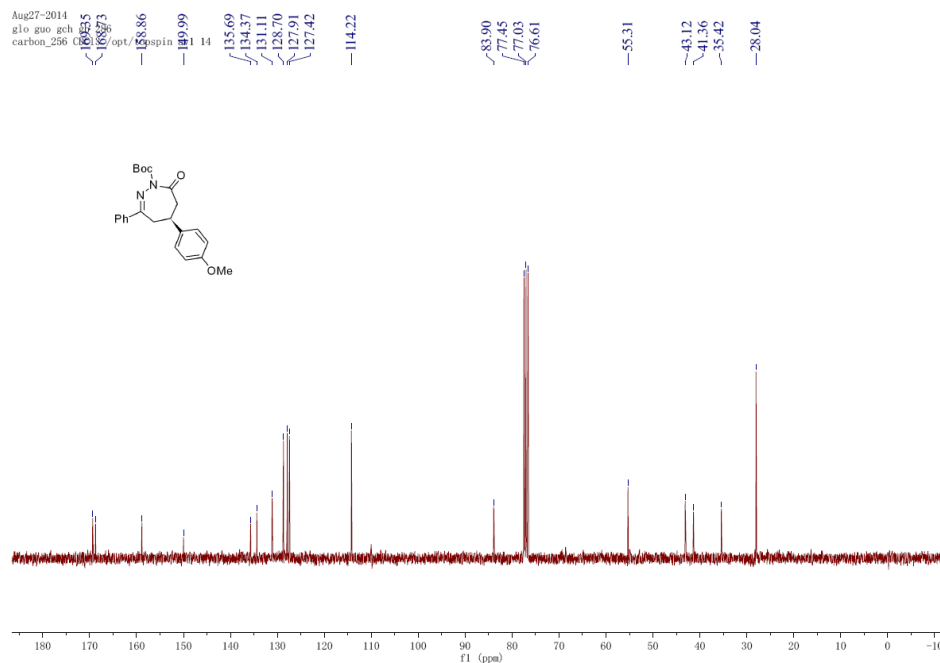



<sup>1</sup>H NMR spectrum of **3gd**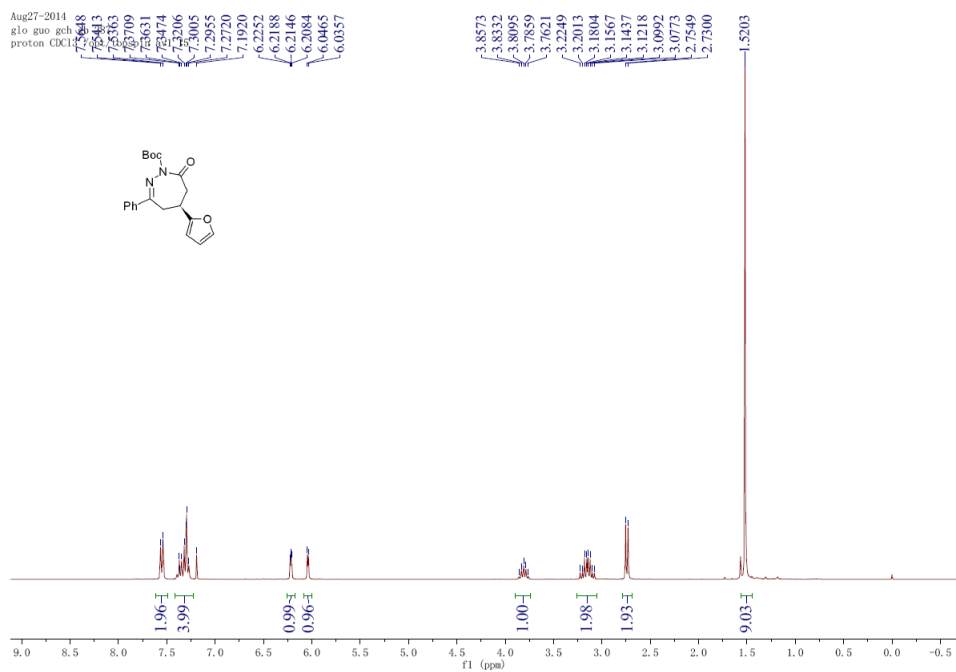

<sup>13</sup>C NMR spectrum of **3gd**

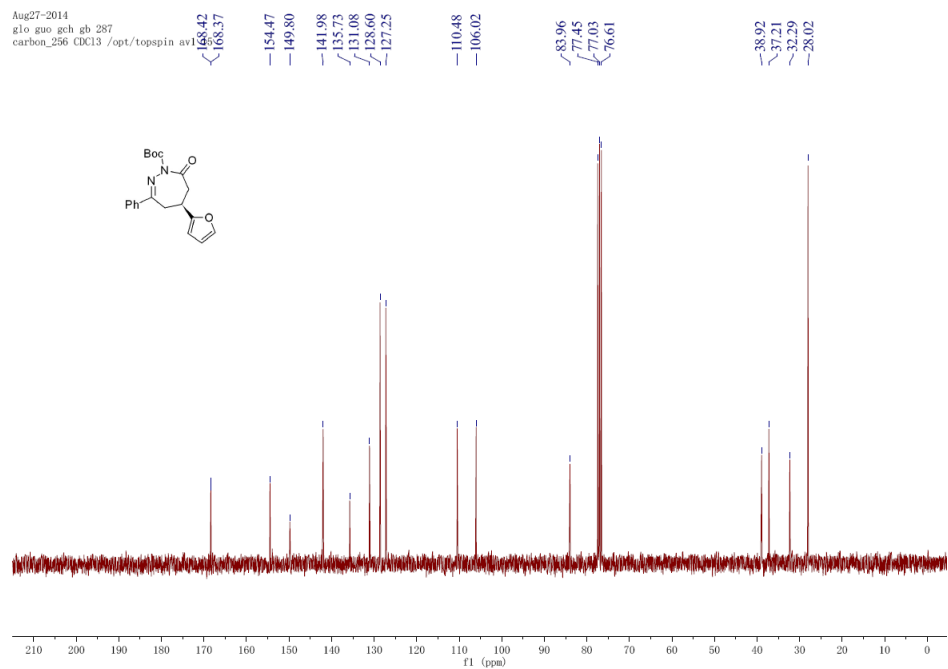

# <sup>1</sup>H NMR spectrum of **3hd**

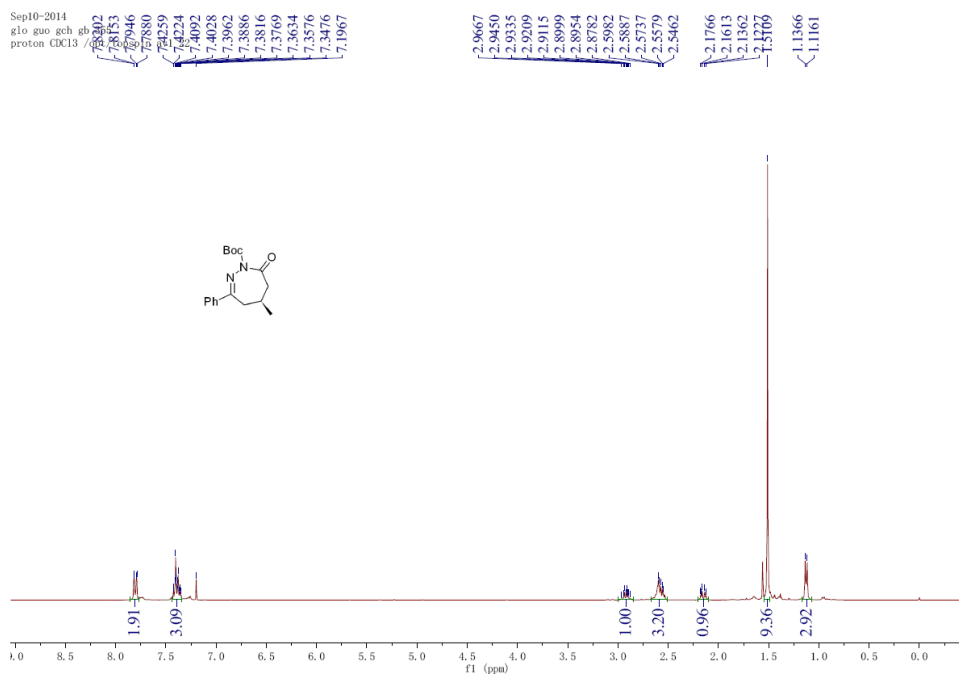

# <sup>13</sup>C NMR spectrum of **3hd**

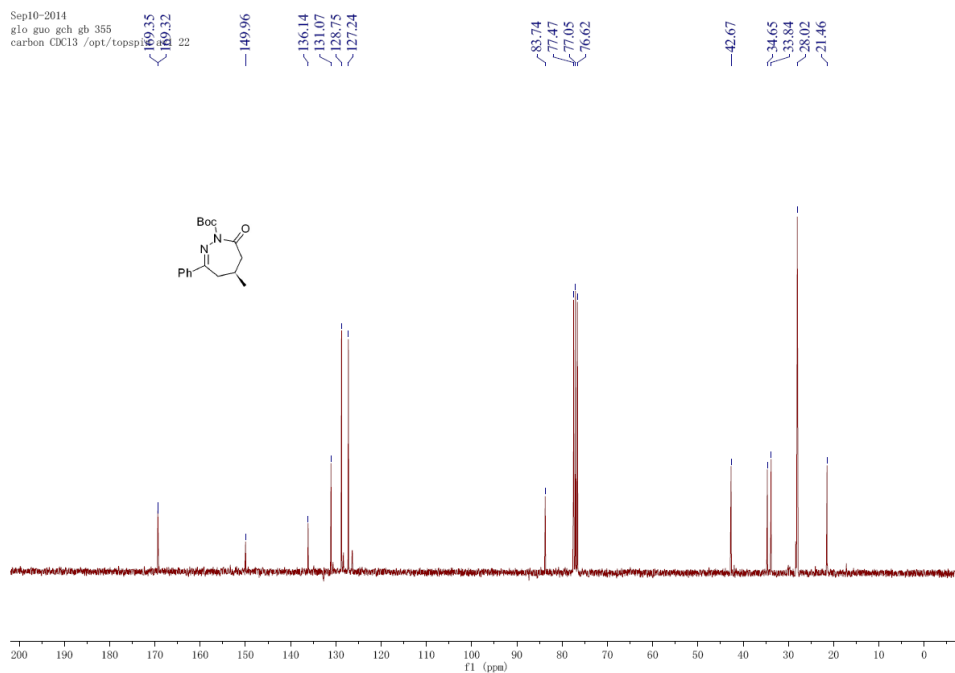

# <sup>1</sup>H NMR spectrum of **3id**

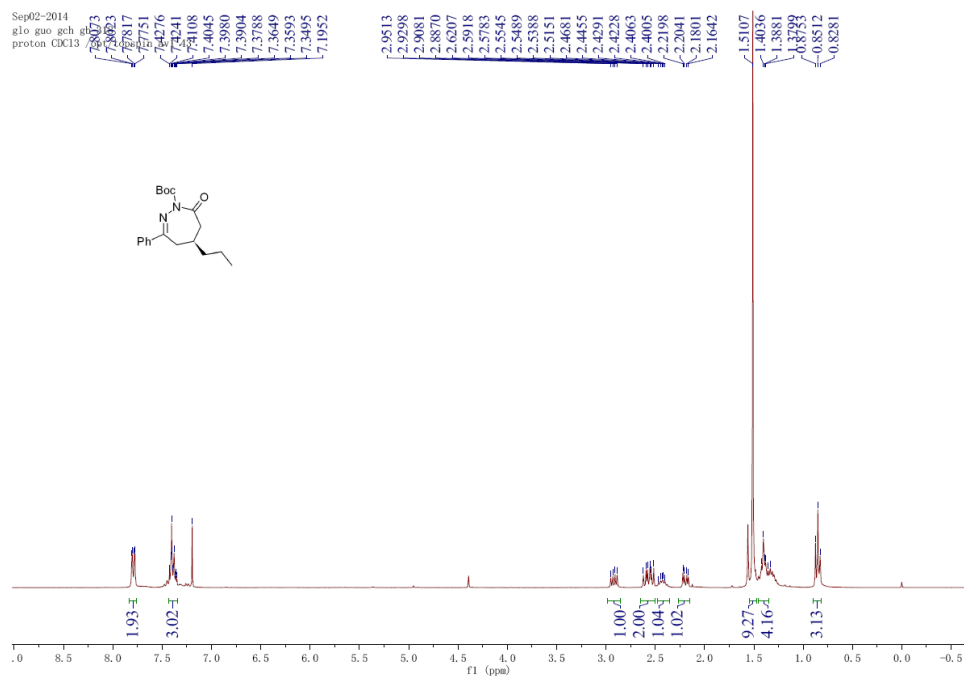

# <sup>13</sup>C NMR spectrum of **3id**

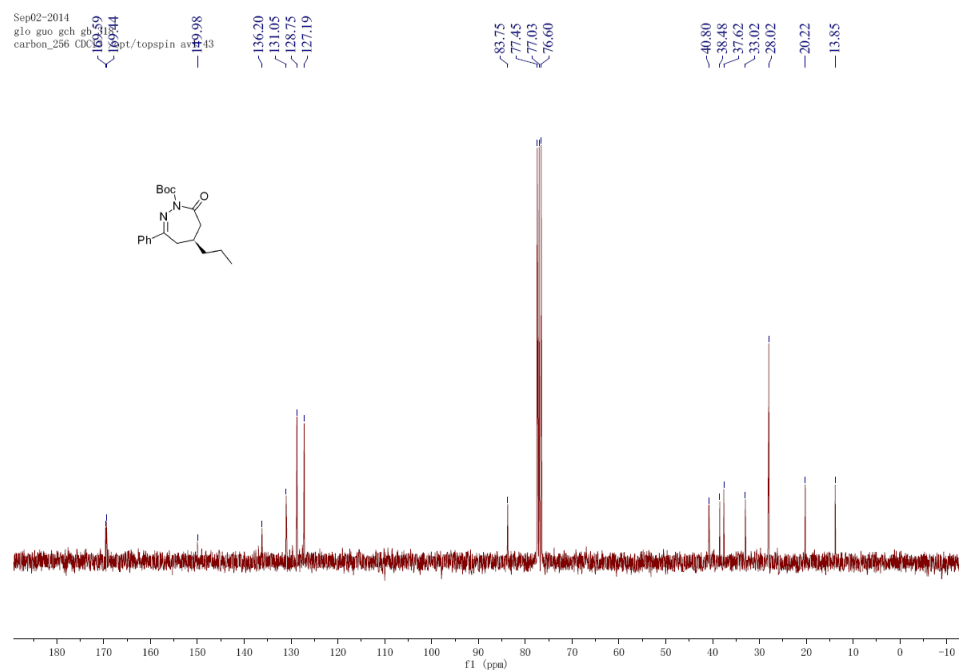

<sup>1</sup>H NMR spectrum of **3ae**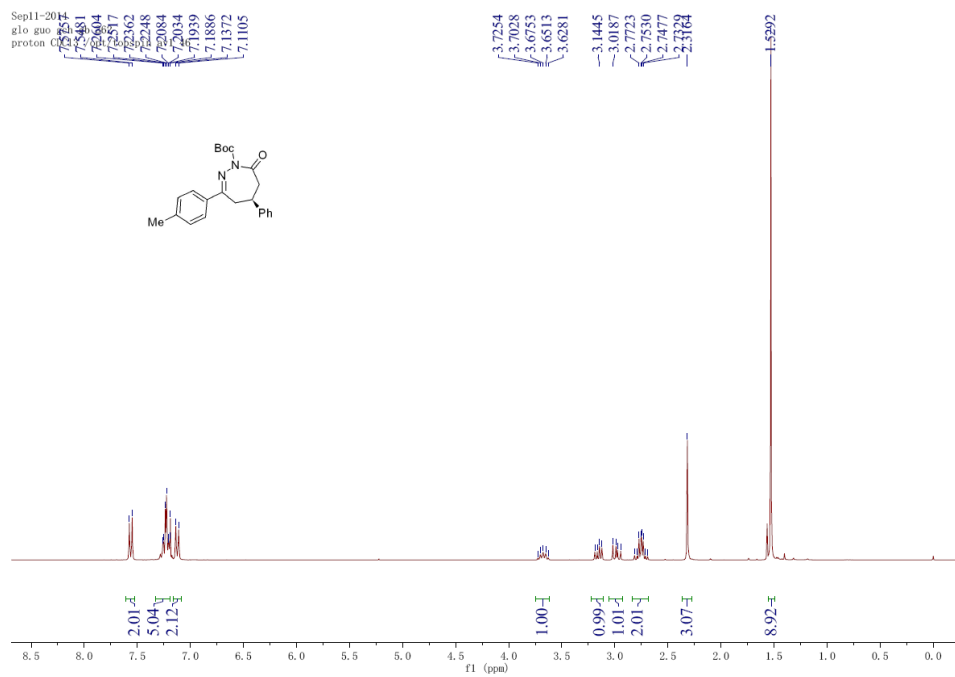 $^{13}\text{C}$  NMR spectrum of **3ae**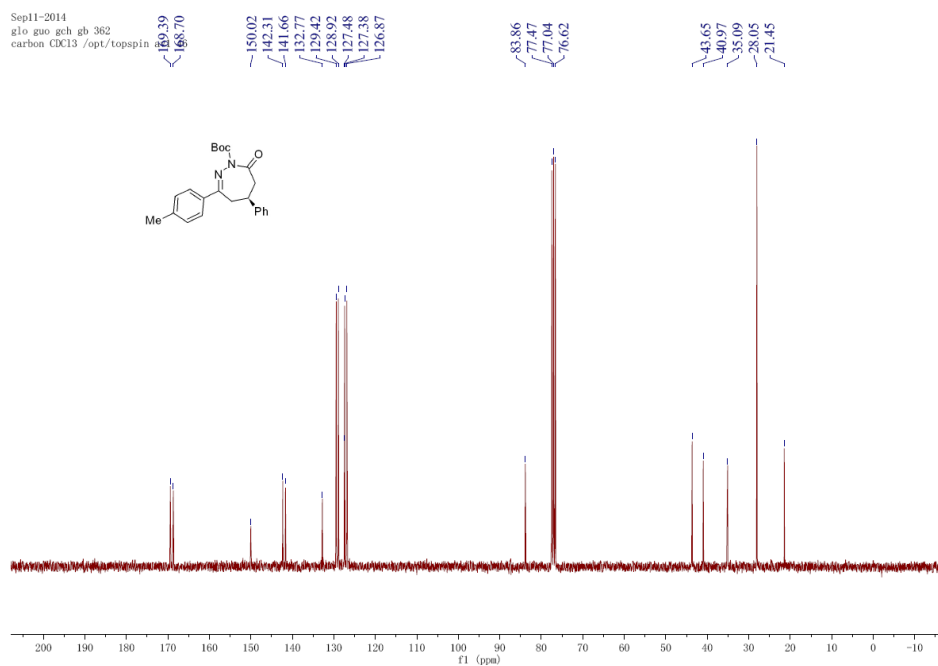

# <sup>1</sup>H NMR spectrum of **3af**

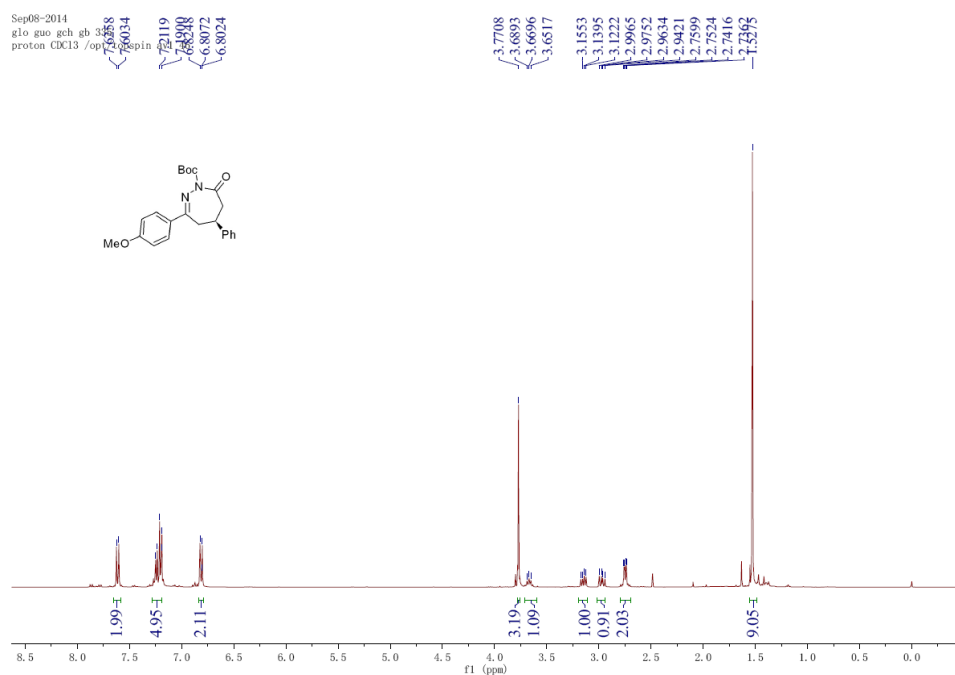

# <sup>13</sup>C NMR spectrum of **3af**

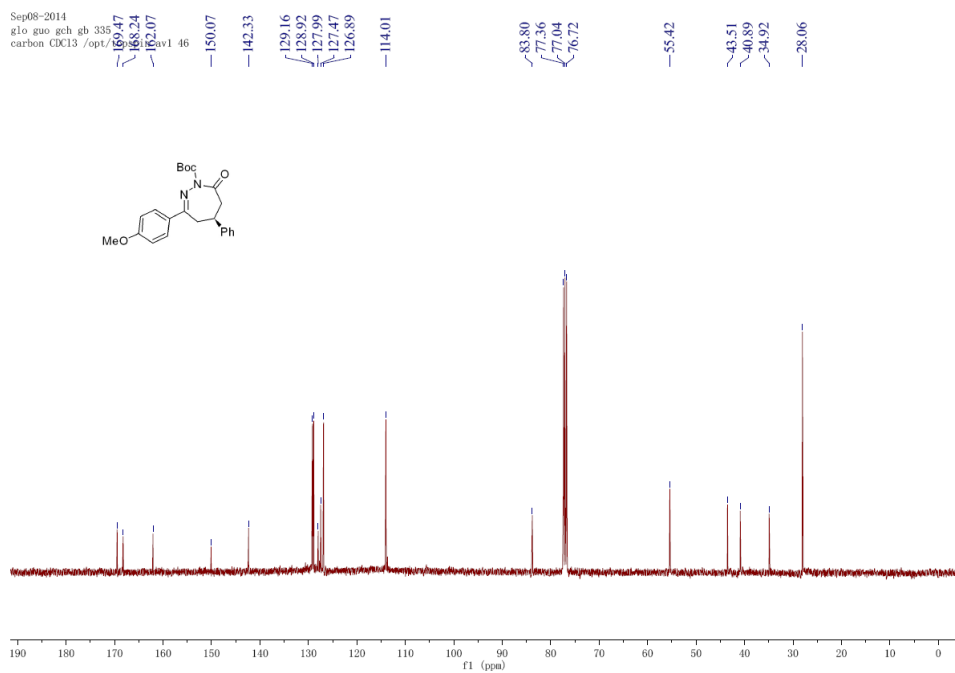

<sup>1</sup>H NMR spectrum of **3ag**

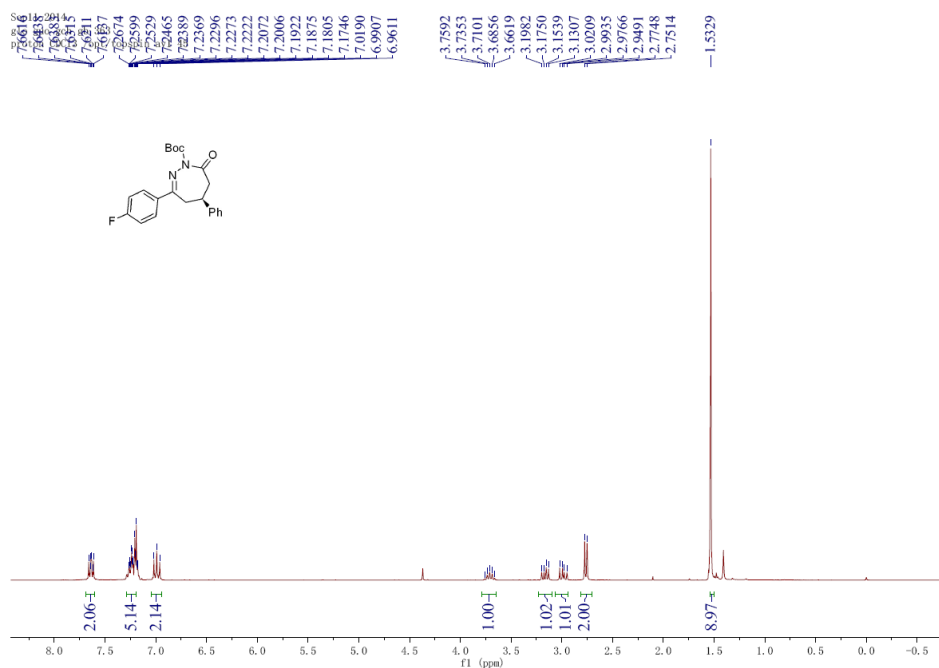

<sup>13</sup>C NMR spectrum of **3ag**

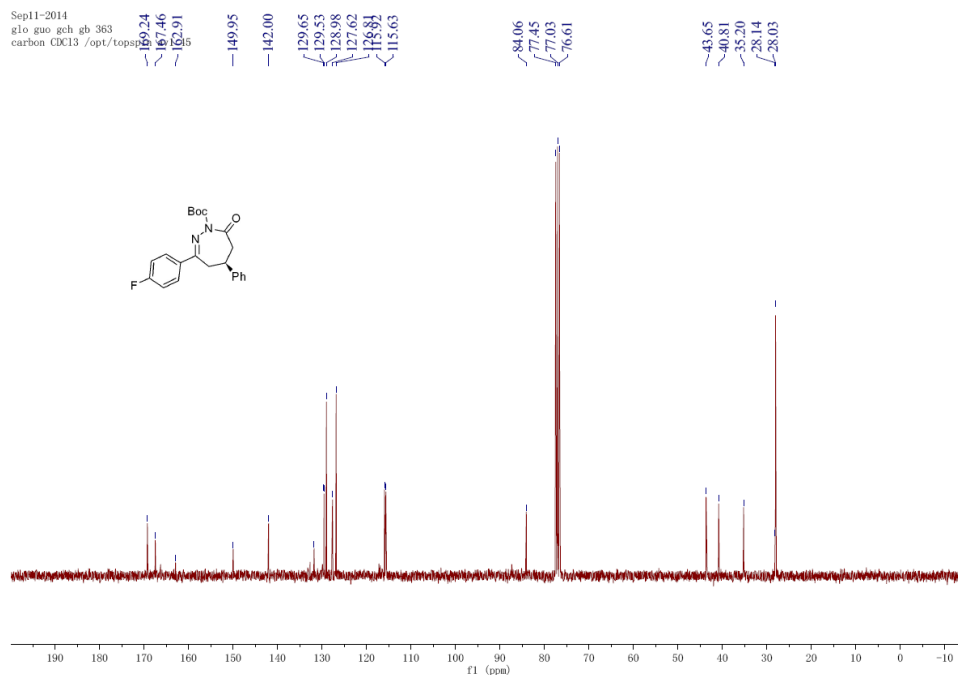

<sup>1</sup>H NMR spectrum of **3ah**

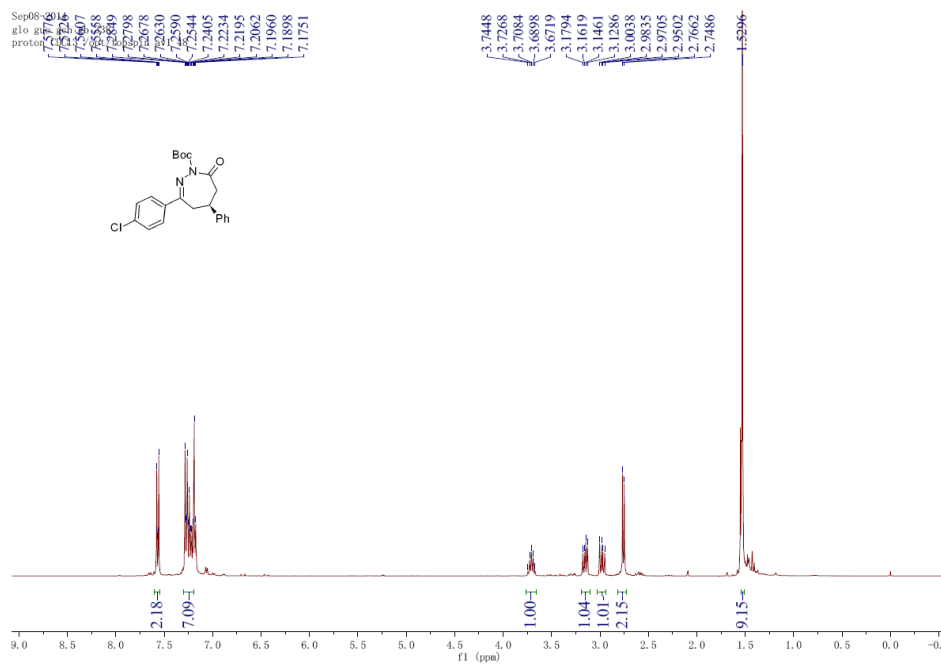

<sup>13</sup>C NMR spectrum of **3ah**

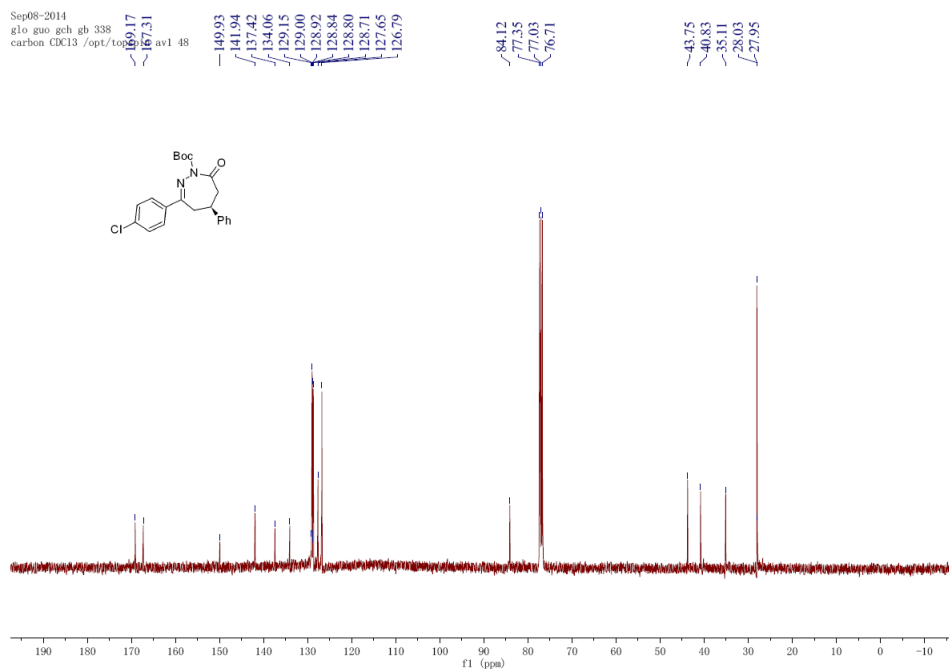

<sup>1</sup>H NMR spectrum of **3ai**

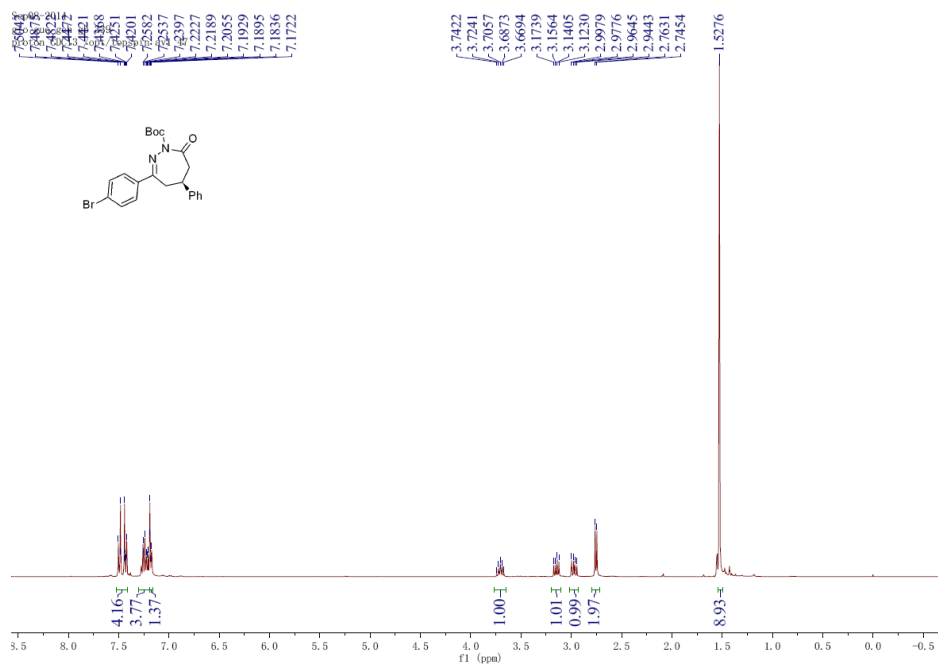



# <sup>1</sup>H NMR spectrum of **3aj**

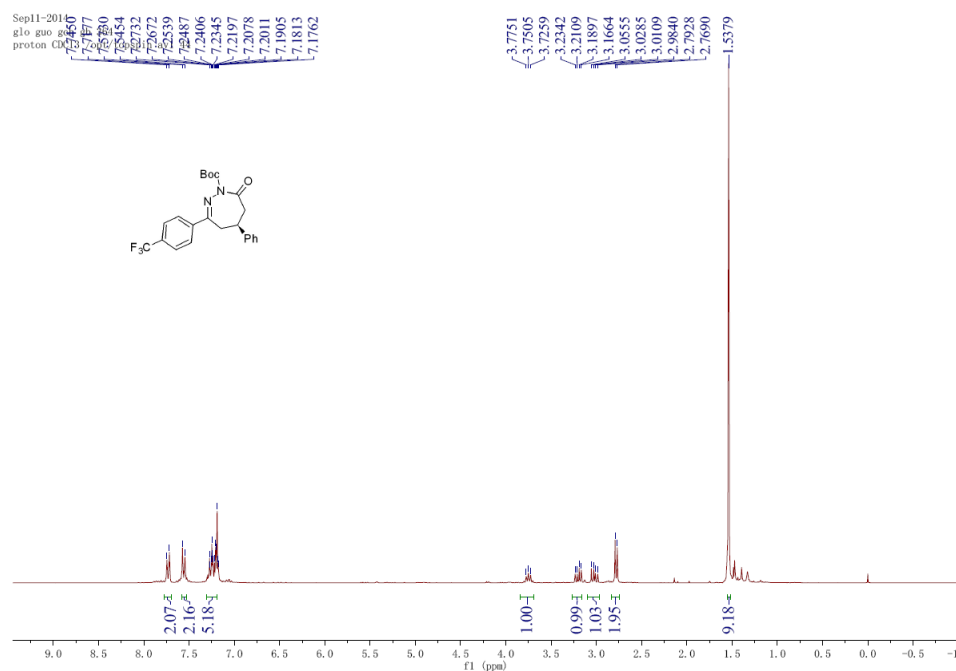

# <sup>13</sup>C NMR spectrum of **3aj**

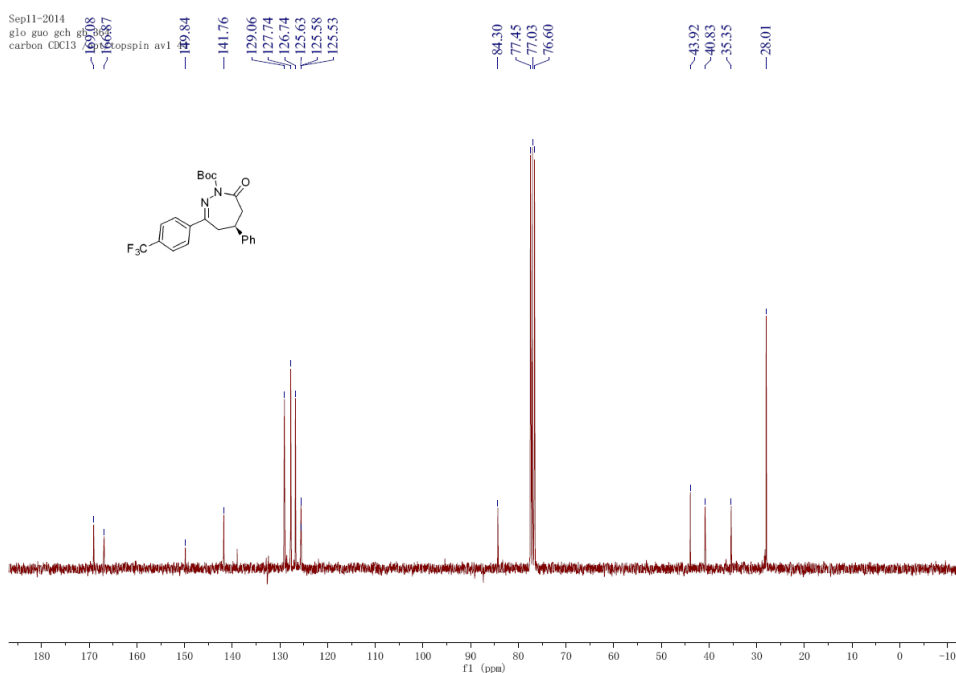

<sup>1</sup>H NMR spectrum of **3ak**

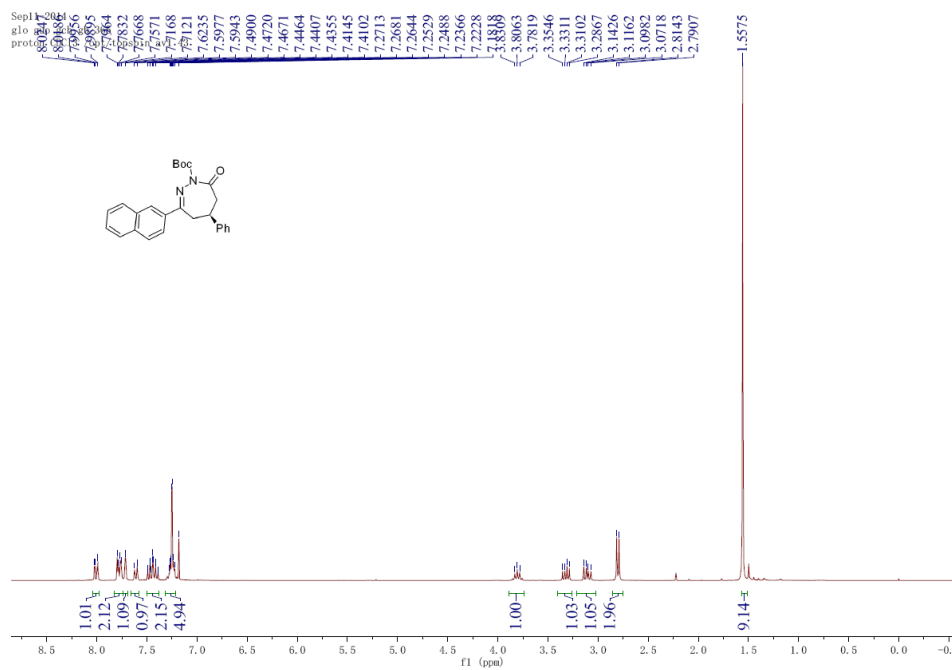

<sup>13</sup>C NMR spectrum of **3ak**

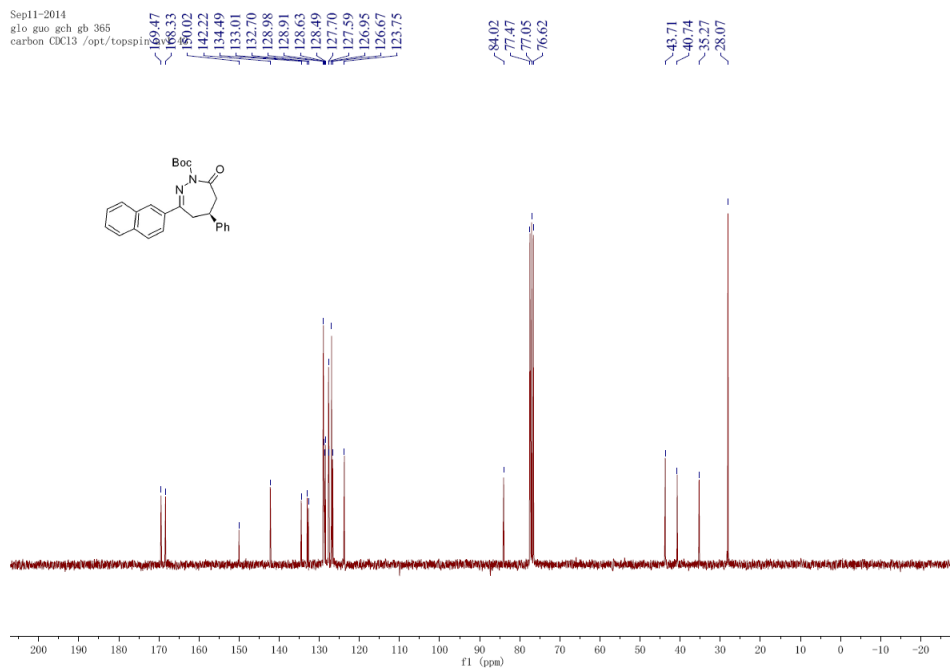

<sup>1</sup>H NMR spectrum of **3al**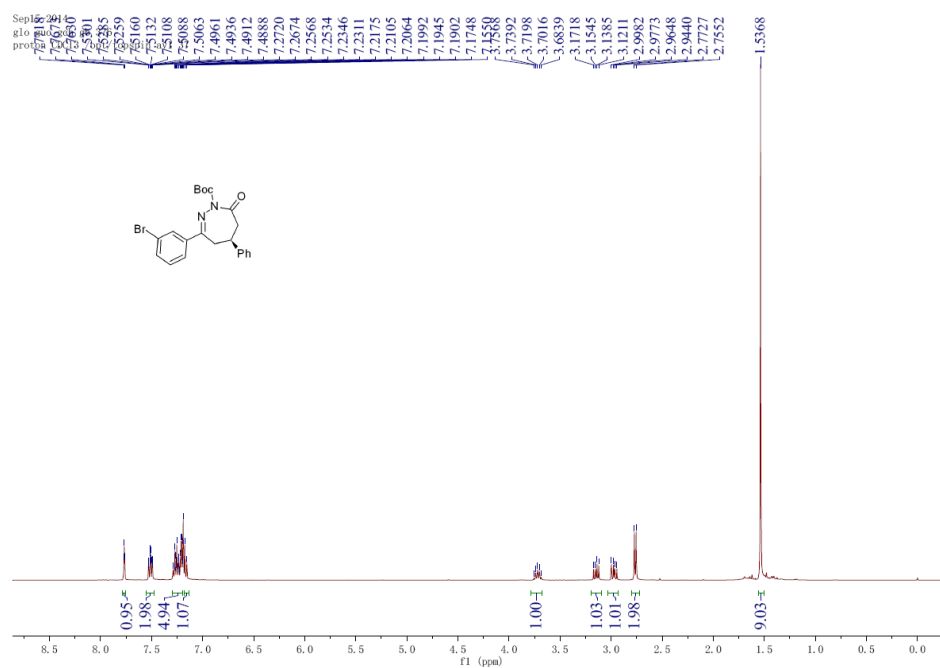 $^{13}\text{C}$  NMR spectrum of **3al**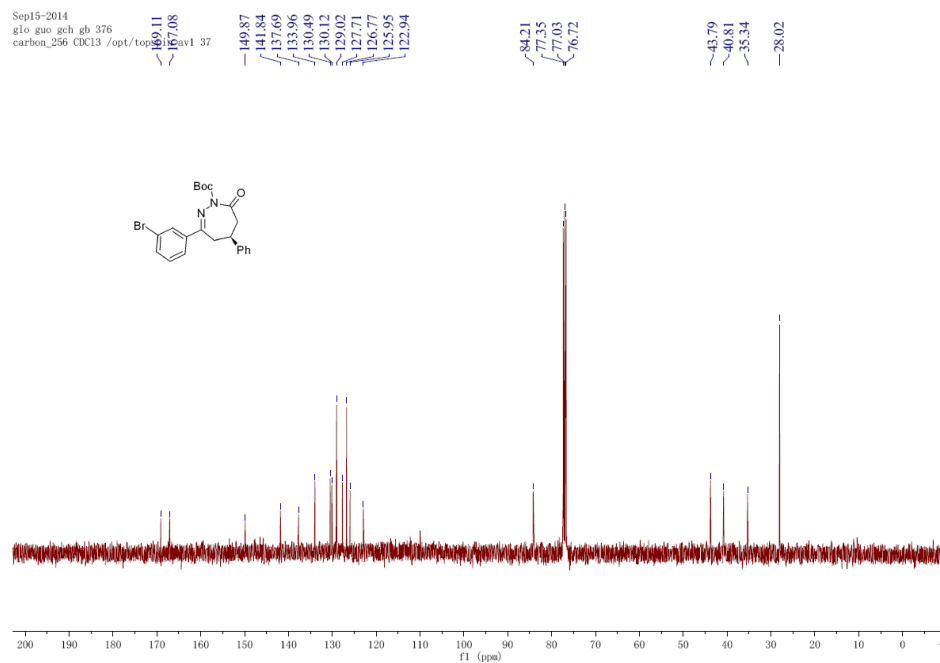

<sup>1</sup>H NMR spectrum of **3am**

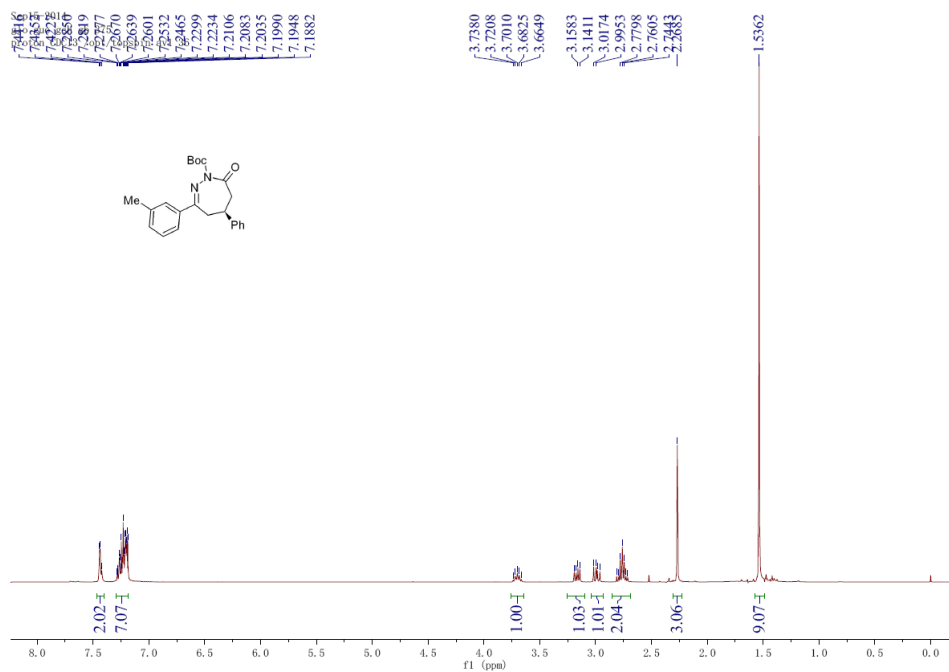 $^{13}\text{C}$  NMR spectrum of **3am**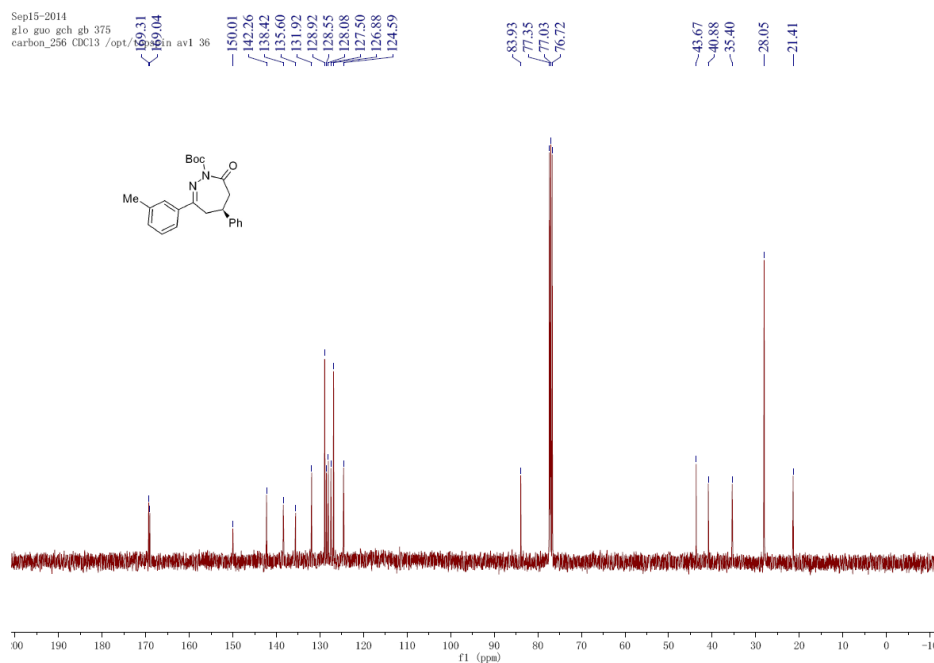

# <sup>1</sup>H NMR spectrum of **3an**

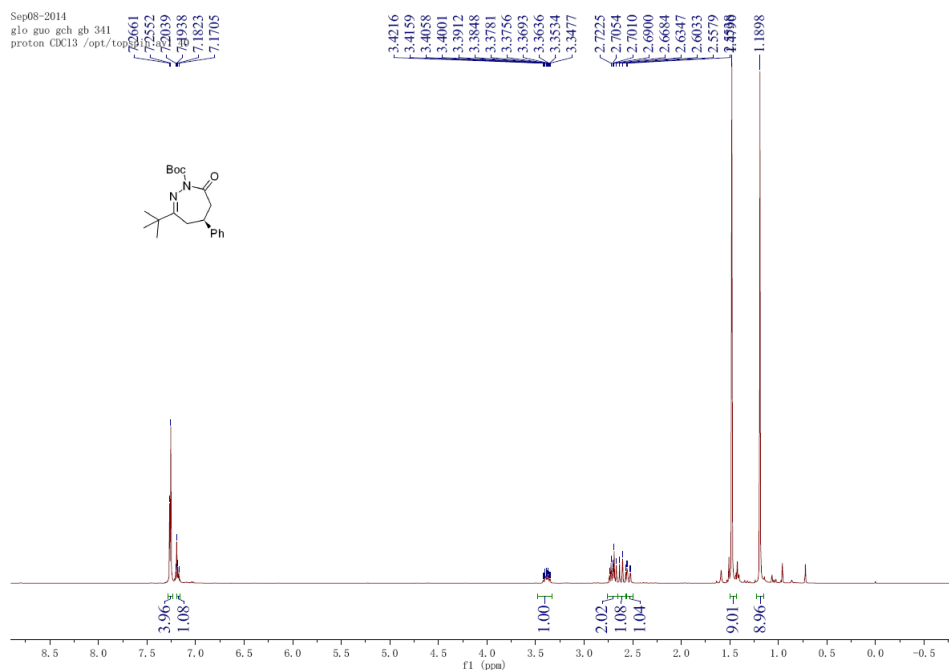

# <sup>13</sup>C NMR spectrum of **3an**

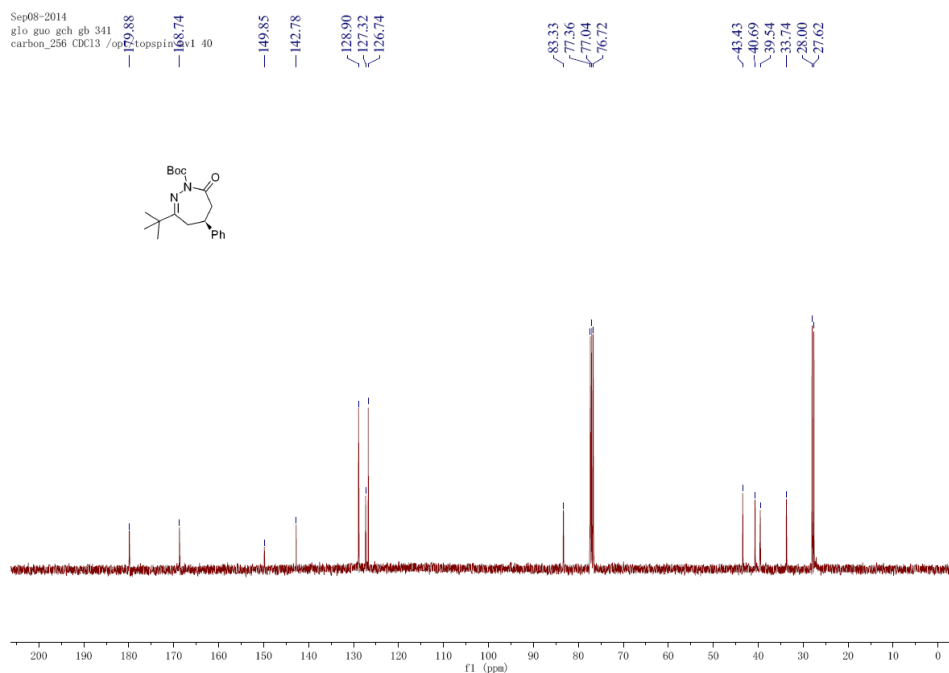

<sup>1</sup>H NMR spectrum of **3ao**

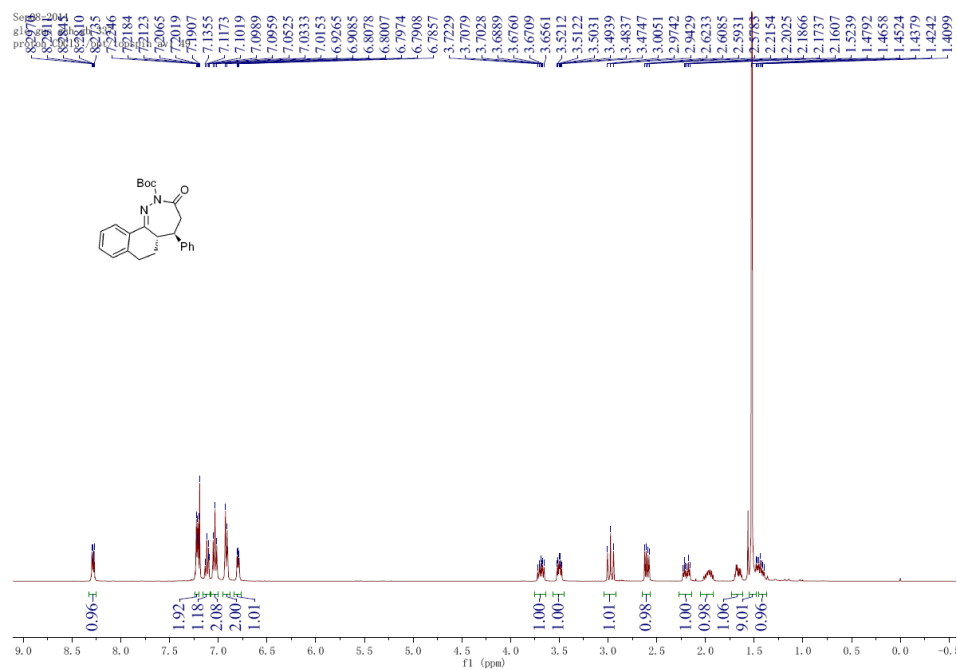

<sup>13</sup>C NMR spectrum of **3ao**

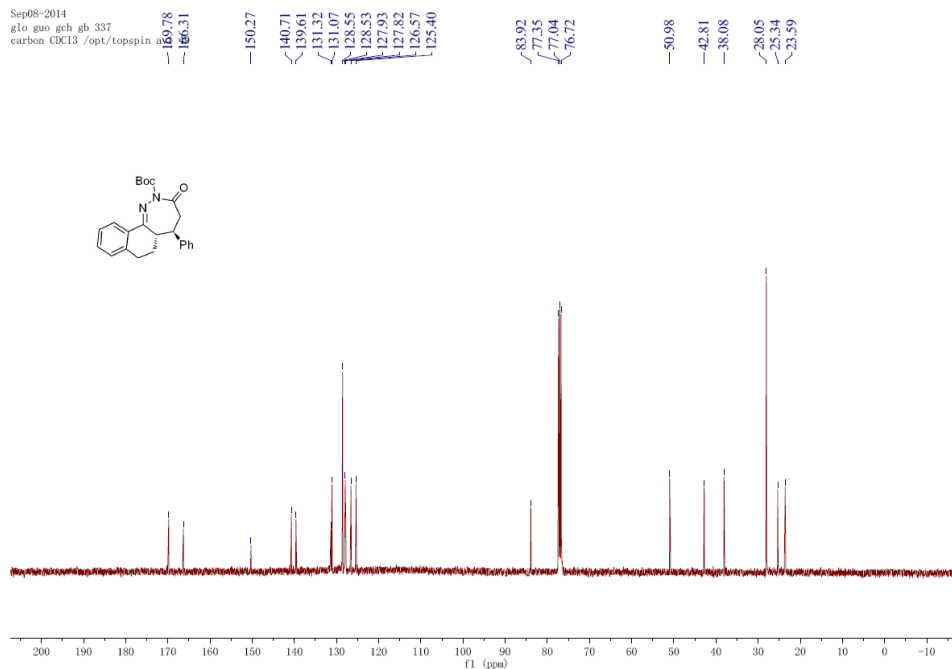

<sup>1</sup>H NMR spectrum of **3ap**

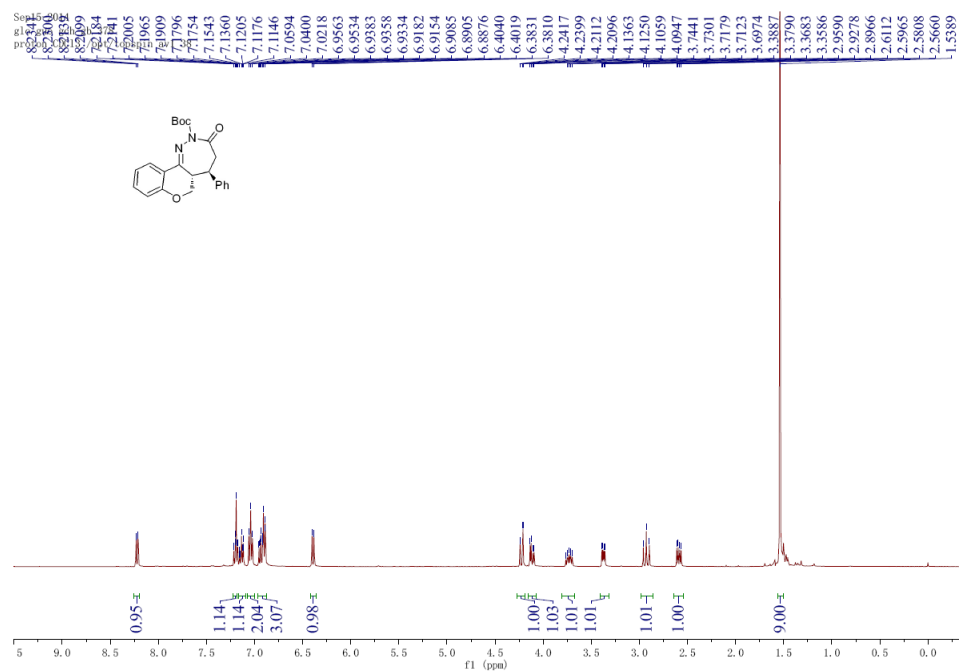

<sup>13</sup>C NMR spectrum of **3ap**

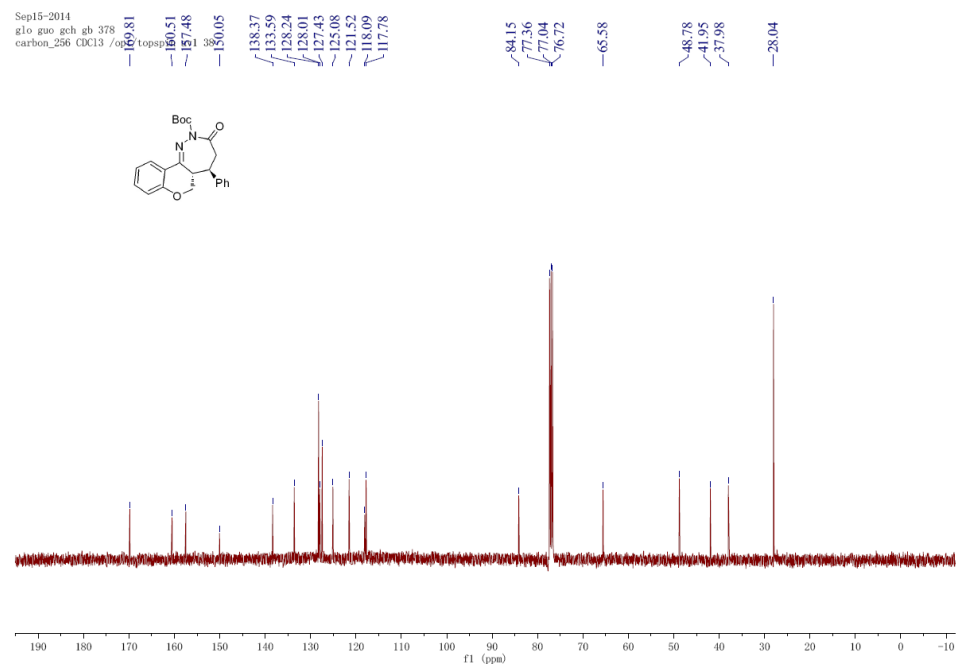

## gcosy spectrum of **3ap**

gchgb388\_170914\_299k\_gcosy\_1  
gchgb388\_170914\_299k\_gcosy\_1  
dir: /mdata/glorius/gchgb388  
600 MHz, probe: hfx\_ph, temp: 299 K

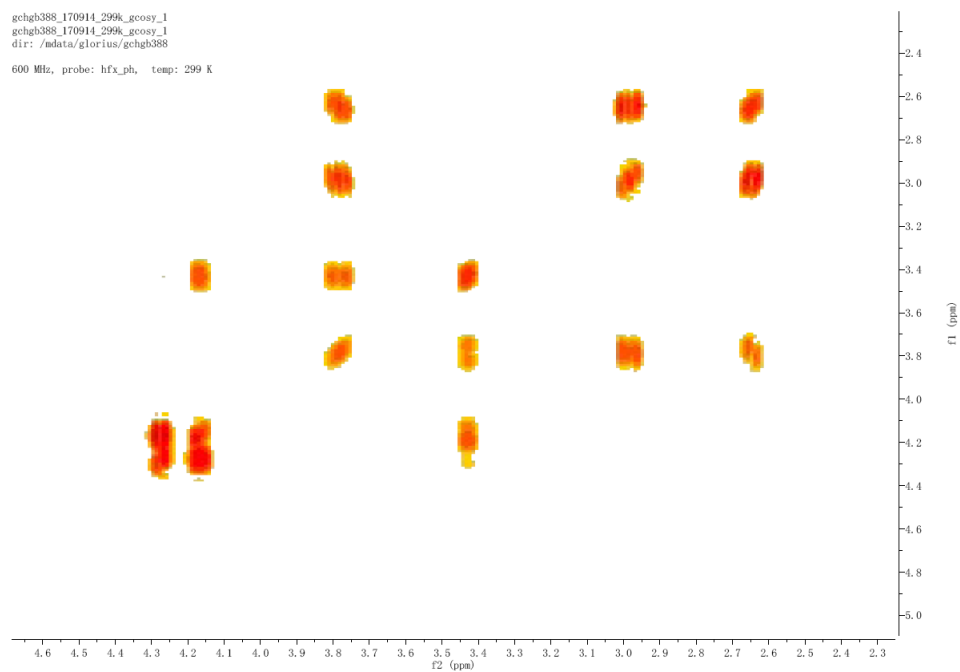

## dept spectrum of **3ap**

gchgb388\_180914\_299k\_dept\_1  
gchgb388\_180914\_299k\_dept\_1  
dir: /mdata/glorius/gchgb388  
600 MHz, probe: hfx\_ph, temp: 299 K

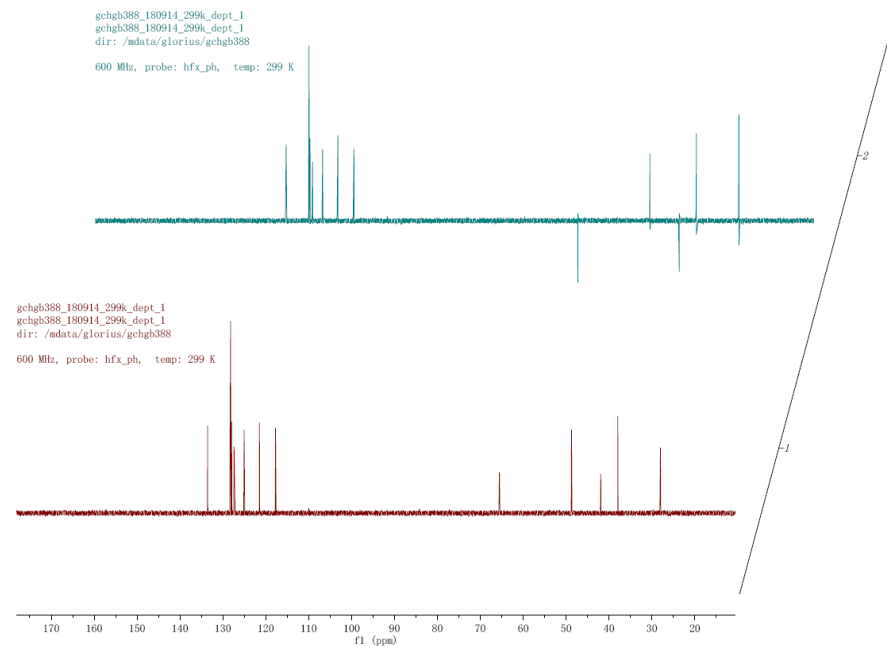



<sup>1</sup>H NMR spectrum of **4ad**

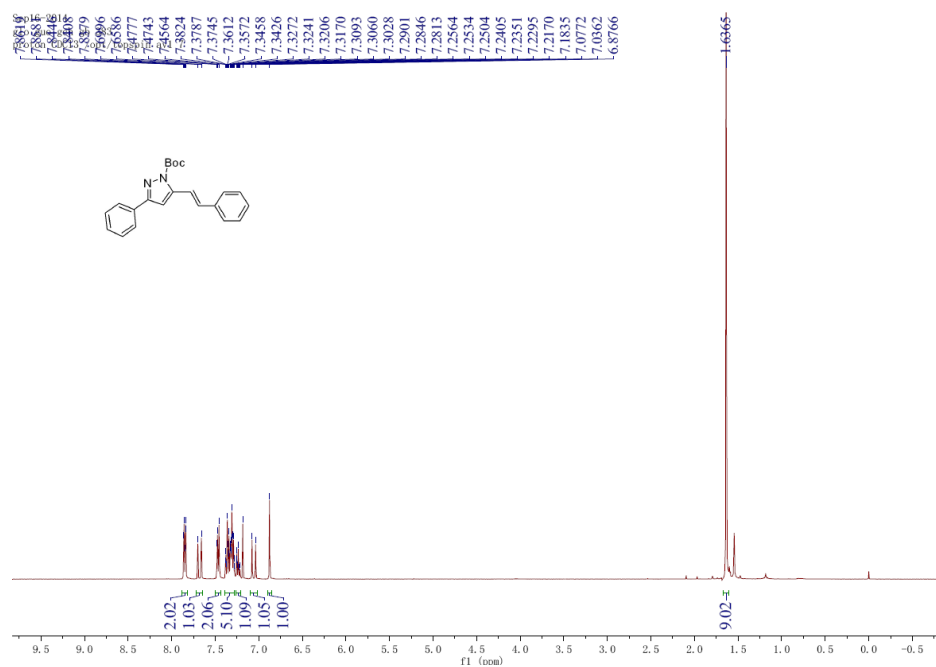

<sup>13</sup>C NMR spectrum of **4ad**

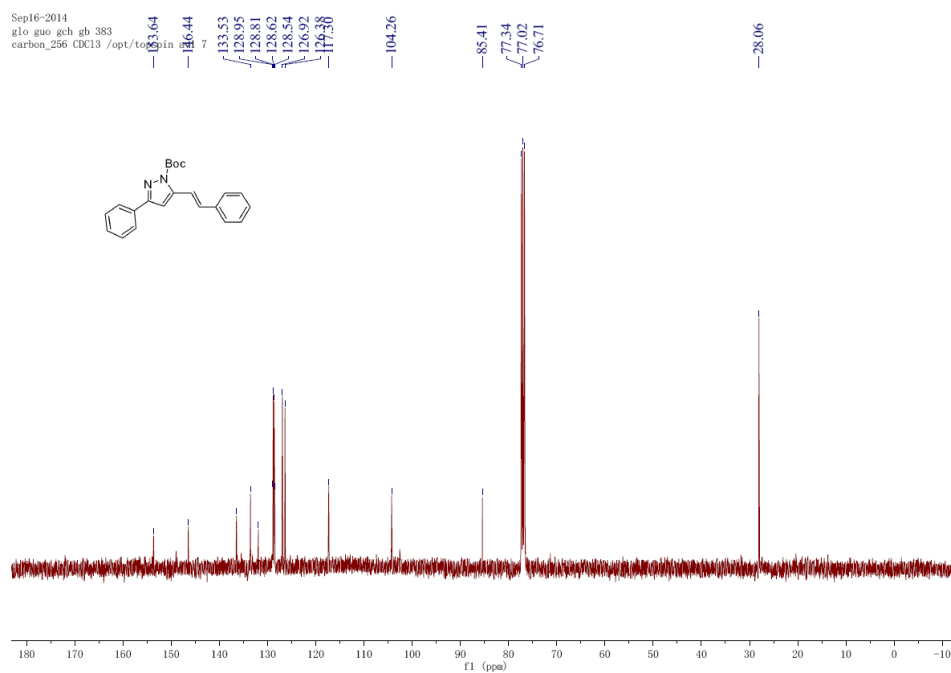

<sup>1</sup>H NMR spectrum of **4bd**

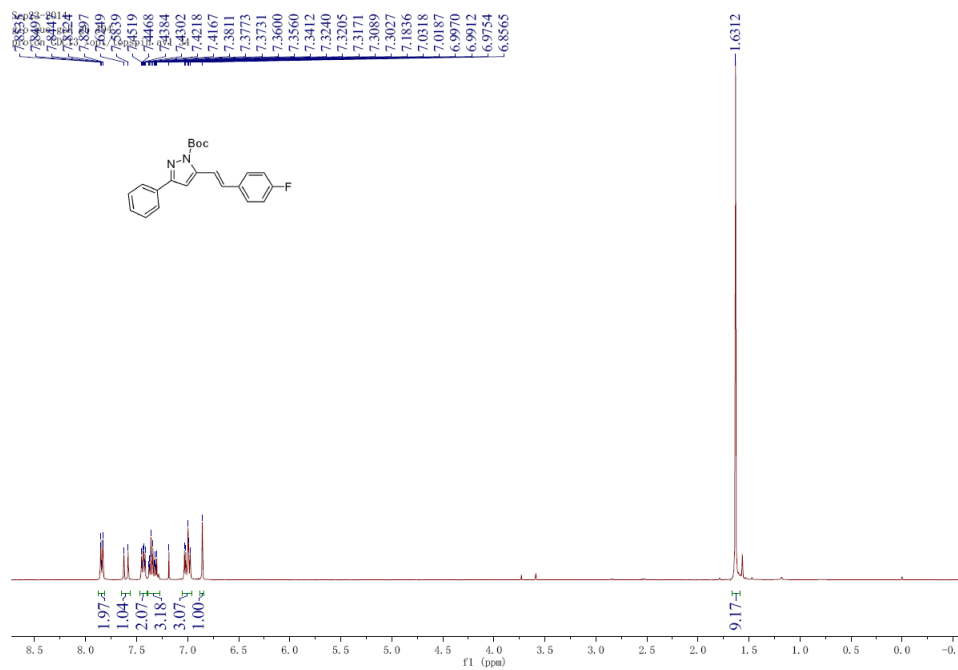

<sup>13</sup>C NMR spectrum of **4bd**

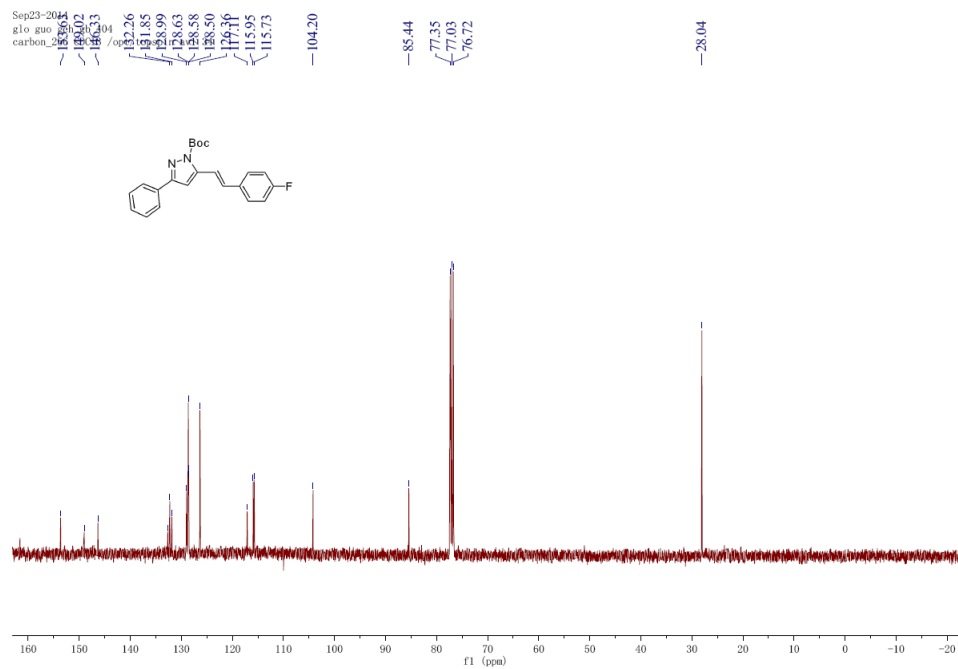

<sup>1</sup>H NMR spectrum of **4ed**

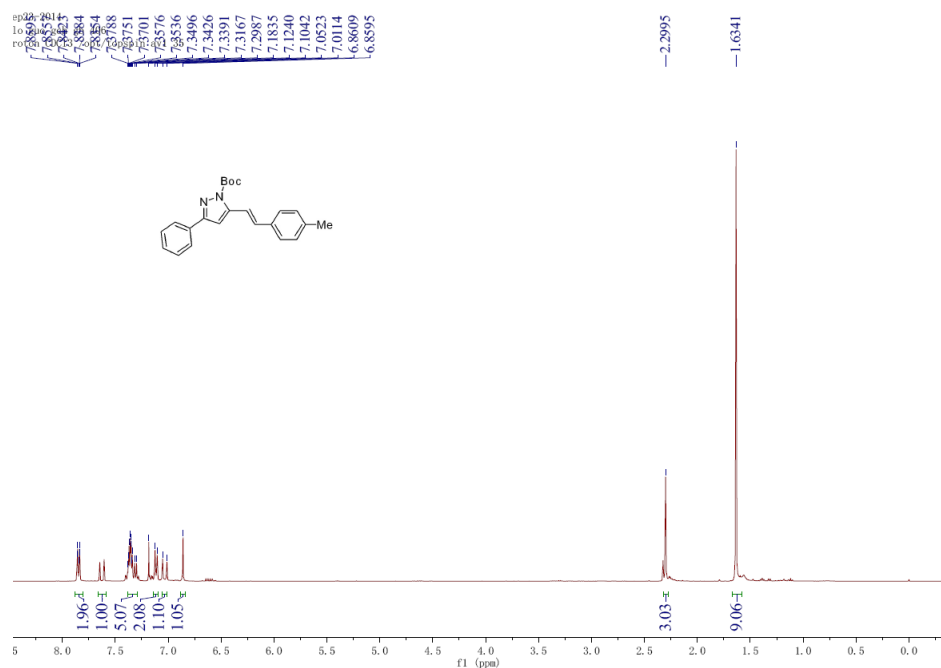 $^{13}\text{C}$  NMR spectrum of **4ed**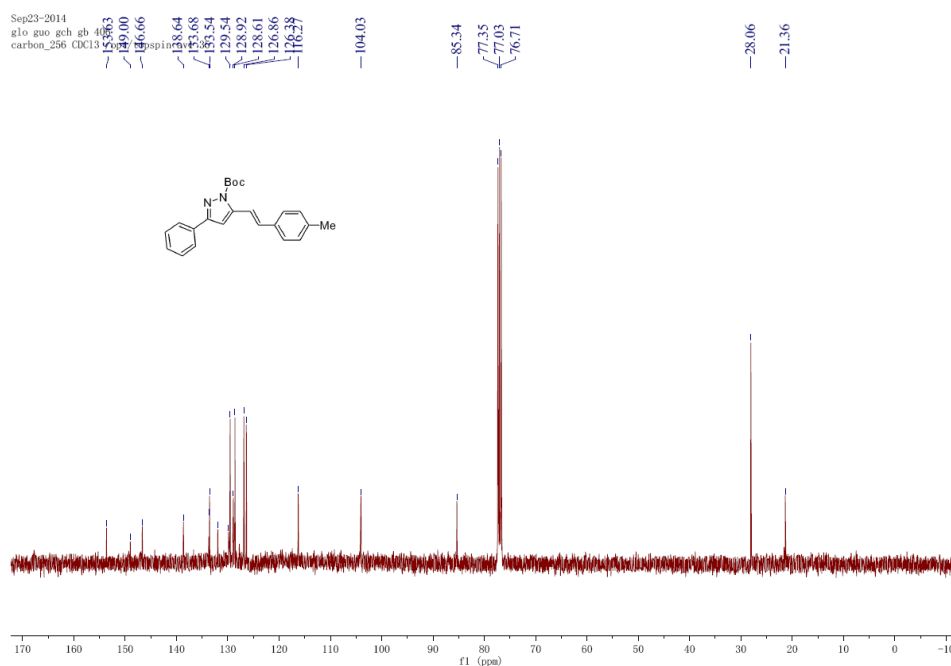

<sup>1</sup>H NMR spectrum of **4gd**

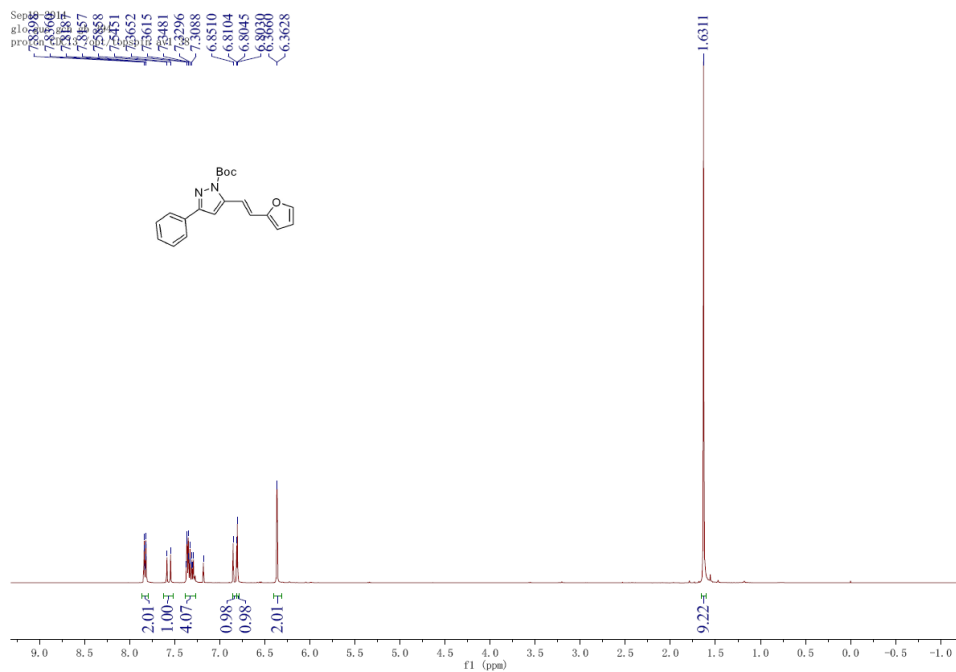 $^{13}\text{C}$  NMR spectrum of **4gd**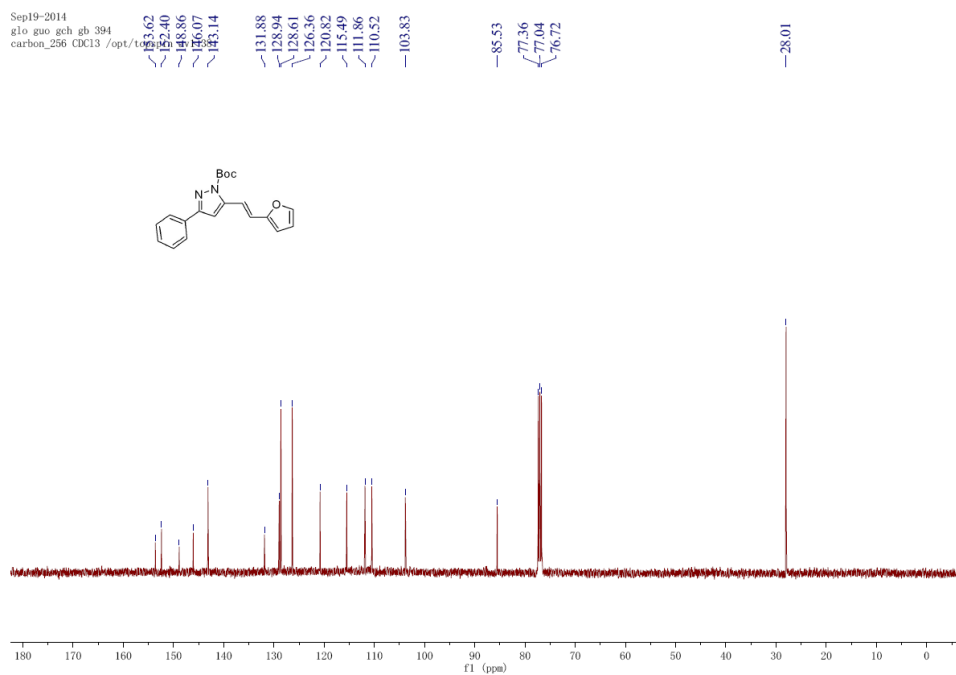

<sup>1</sup>H NMR spectrum of **4ae**

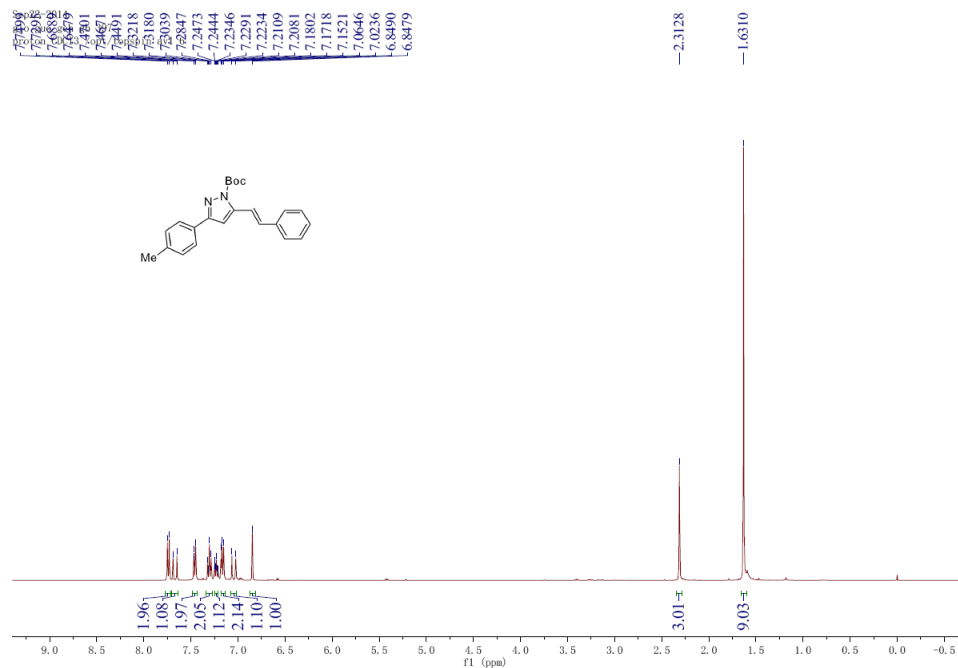

<sup>13</sup>C NMR spectrum of **4ae**

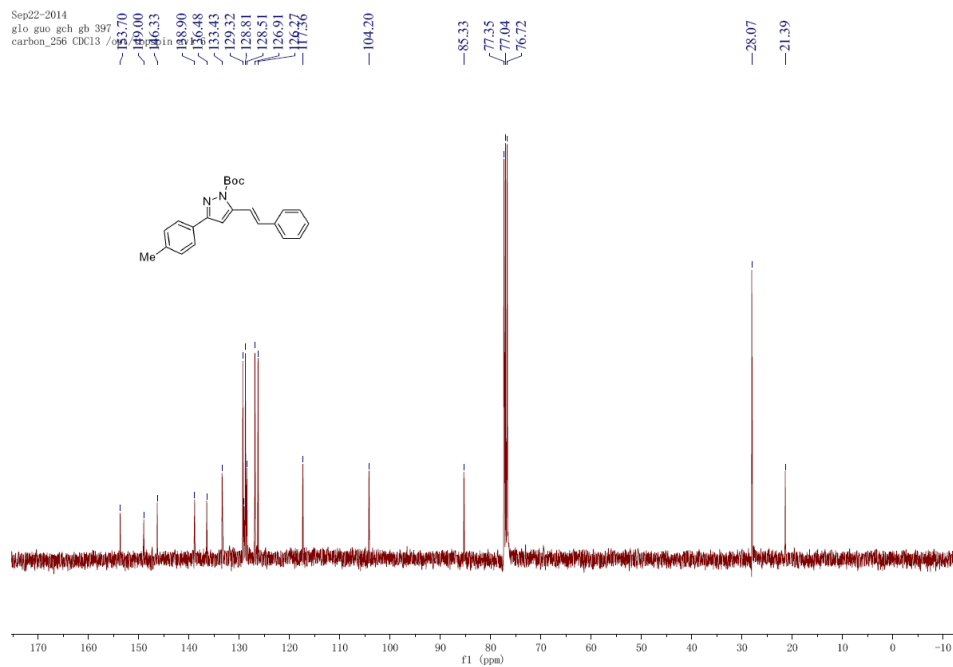

<sup>1</sup>H NMR spectrum of **4ag**

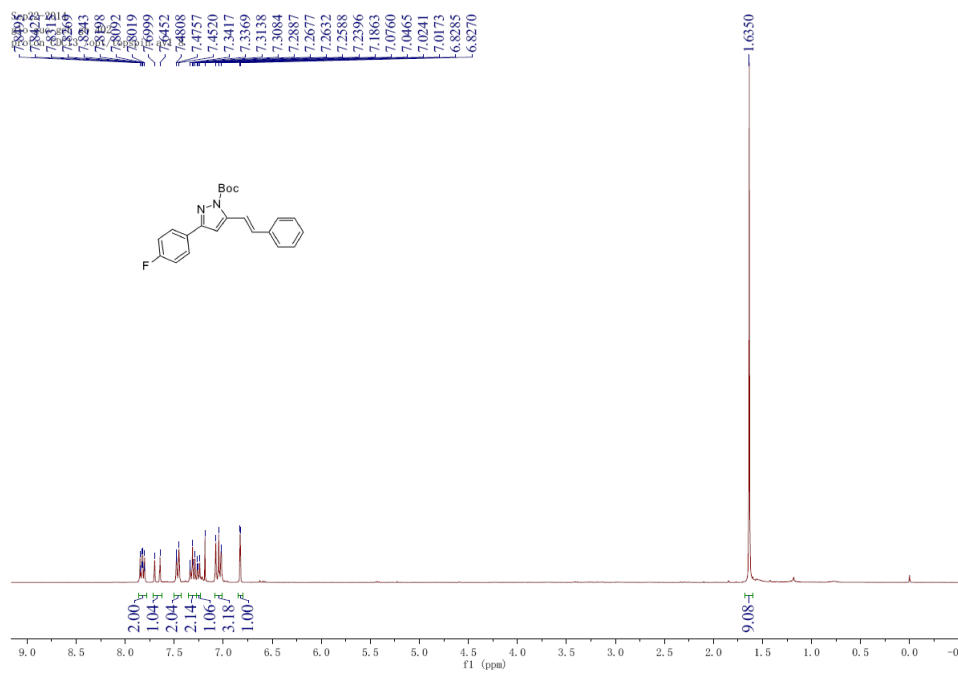 $^{13}\text{C}$  NMR spectrum of **4ag**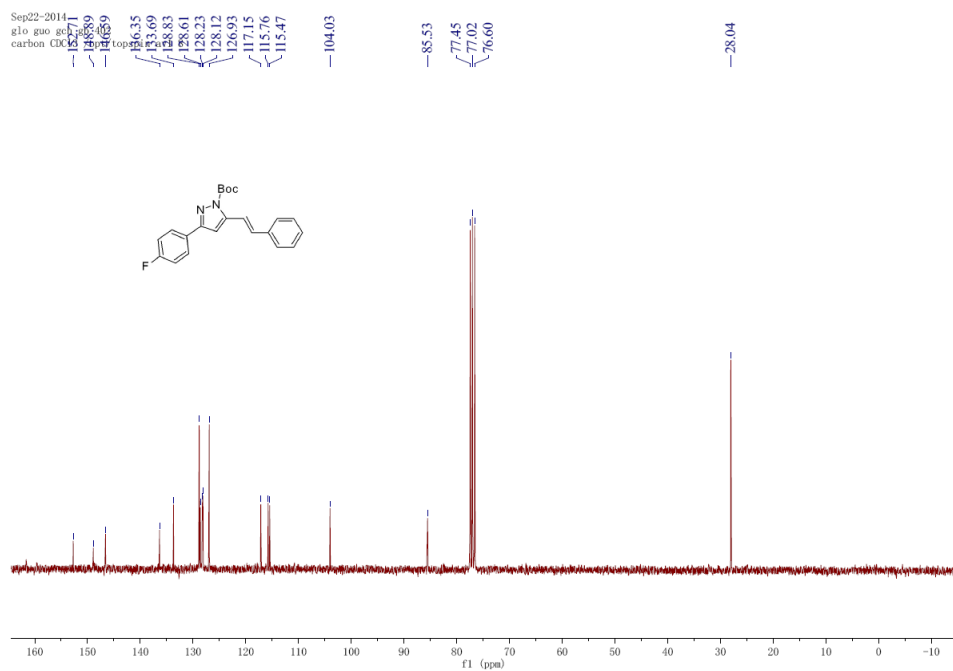

<sup>1</sup>H NMR spectrum of **4ah**

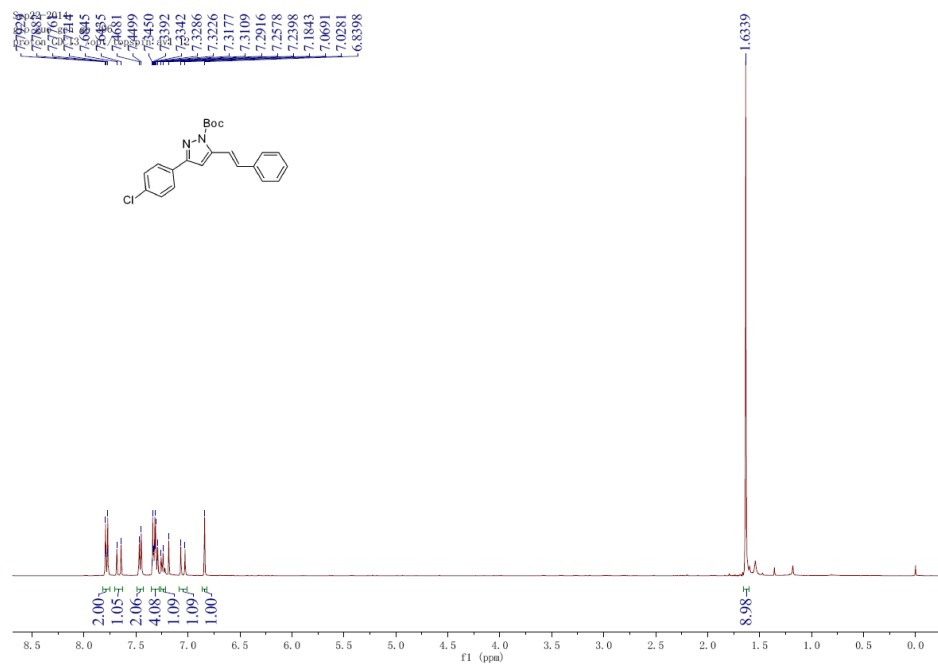

<sup>13</sup>C NMR spectrum of **4ah**

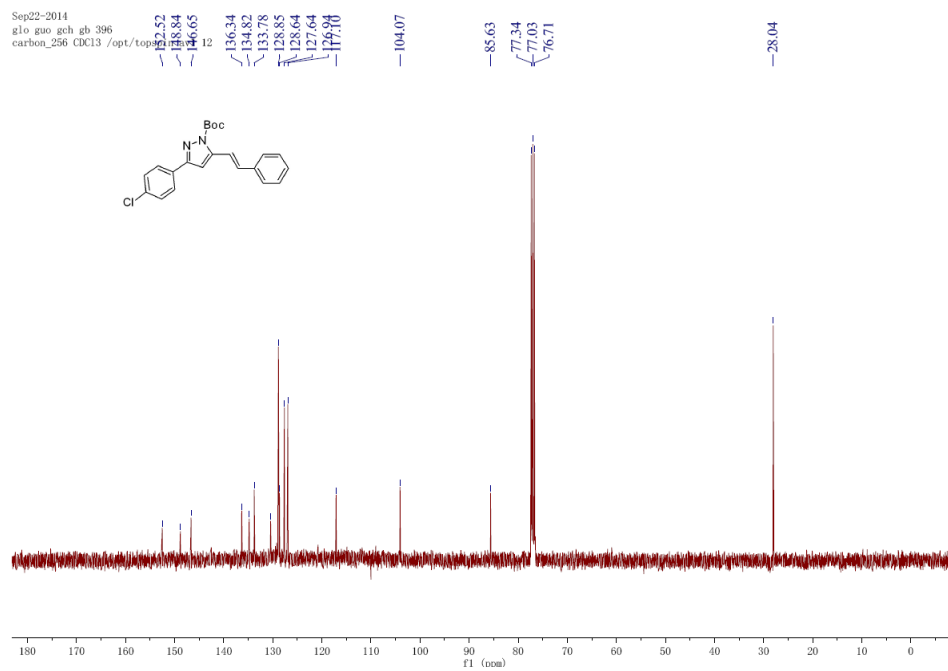

<sup>1</sup>H NMR spectrum of **4ai**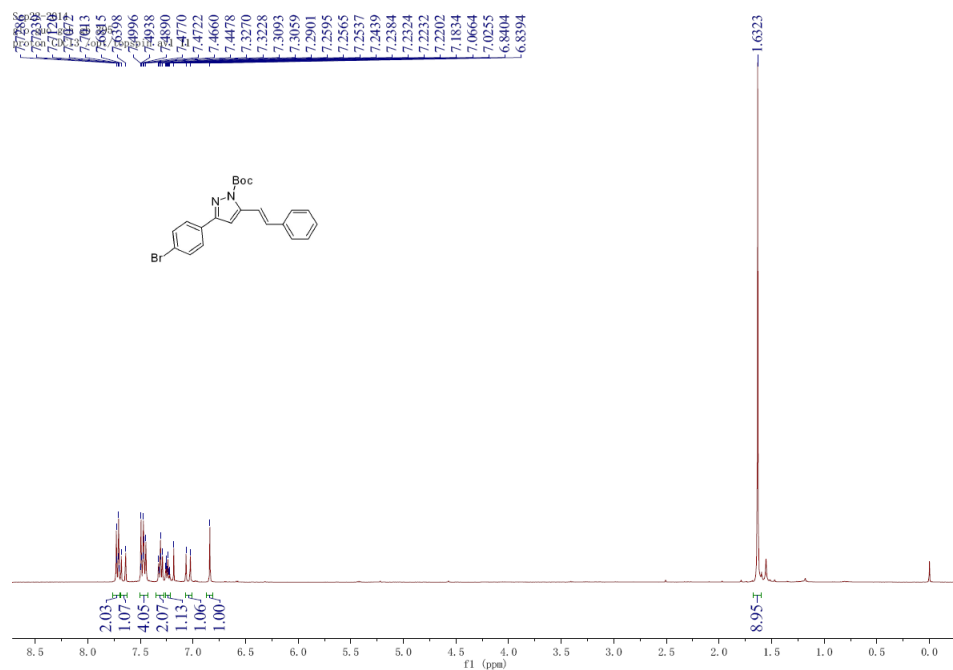 $^{13}\text{C}$  NMR spectrum of **4ai**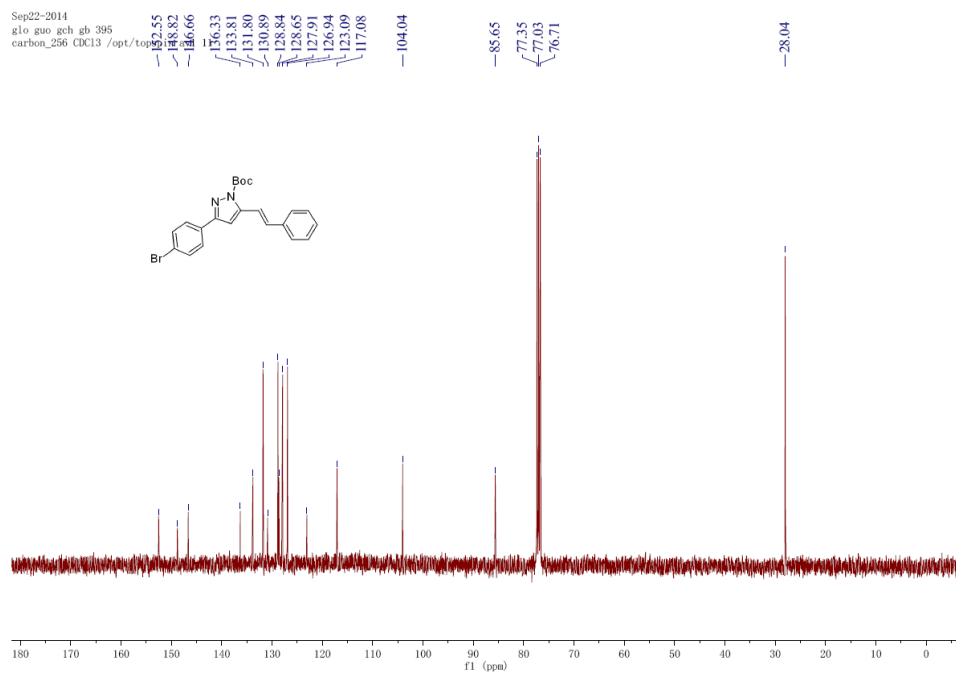



<sup>1</sup>H NMR spectrum of **4ak**

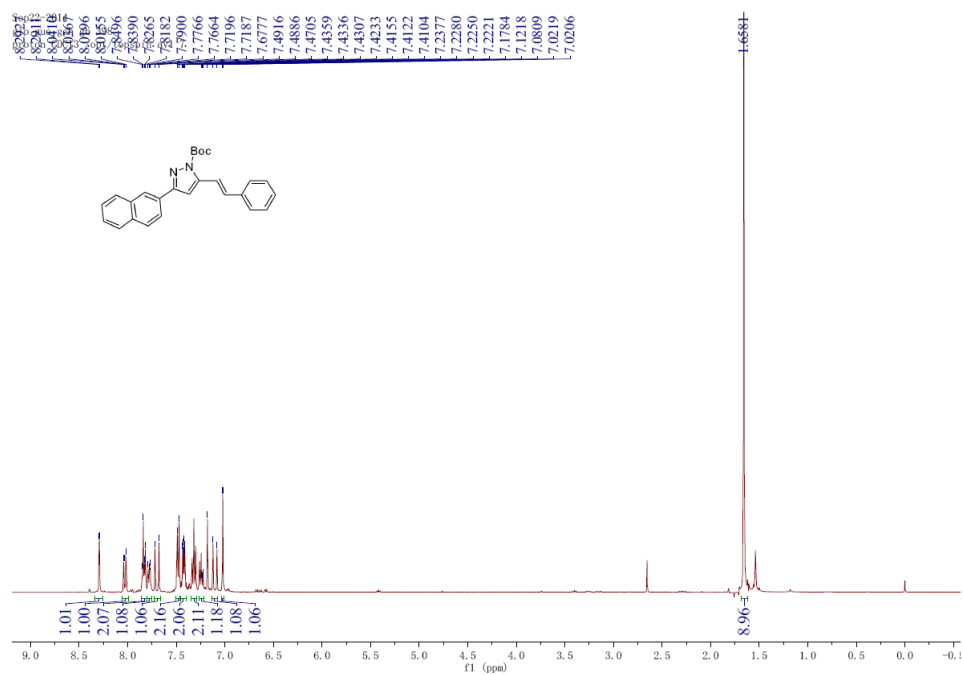

<sup>13</sup>C NMR spectrum of **4ak**

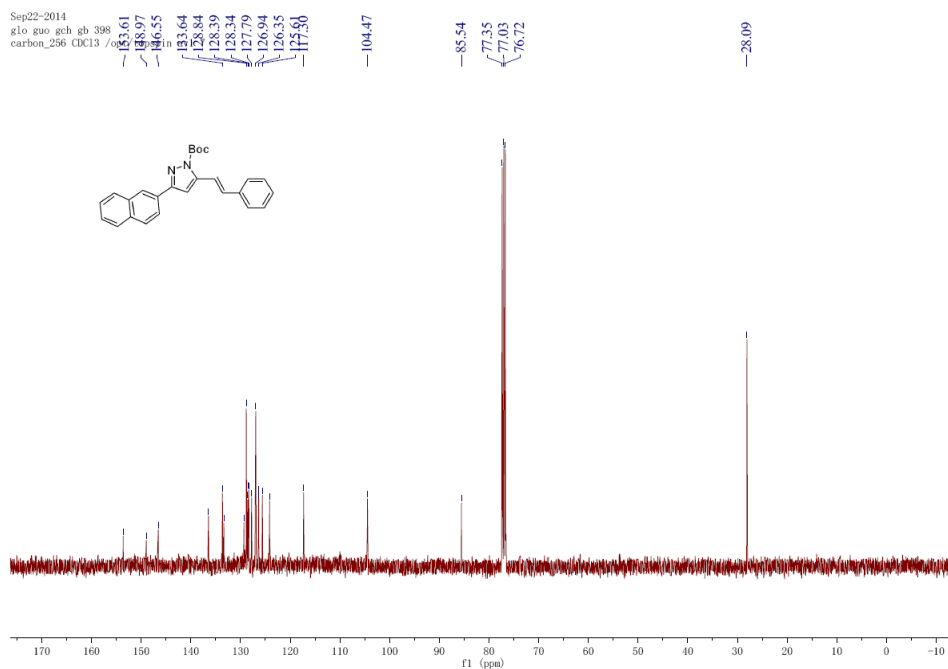

<sup>1</sup>H NMR spectrum of **4am**

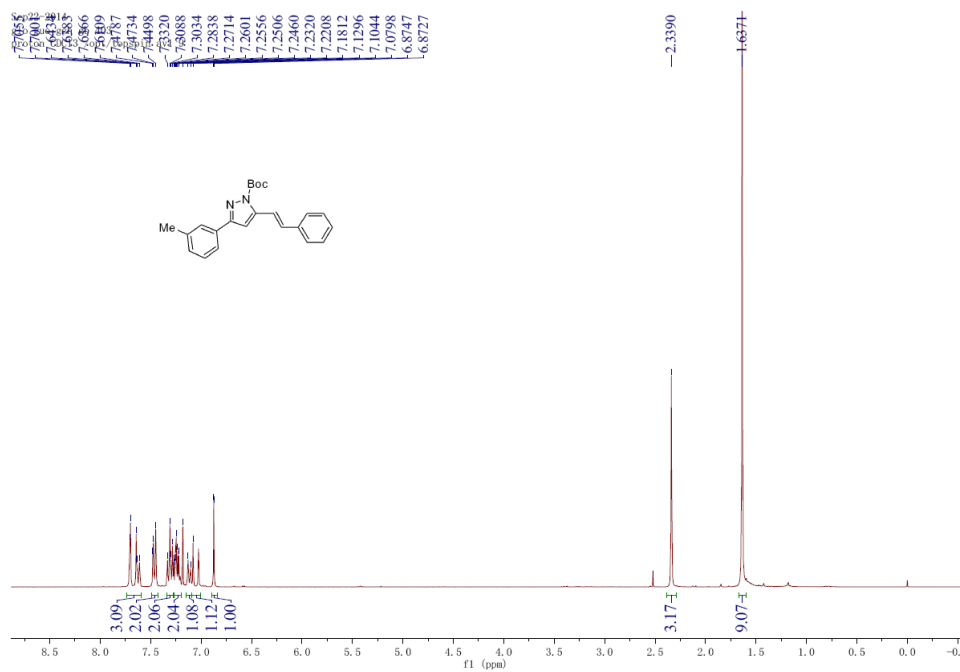 $^{13}\text{C}$  NMR spectrum of **4am**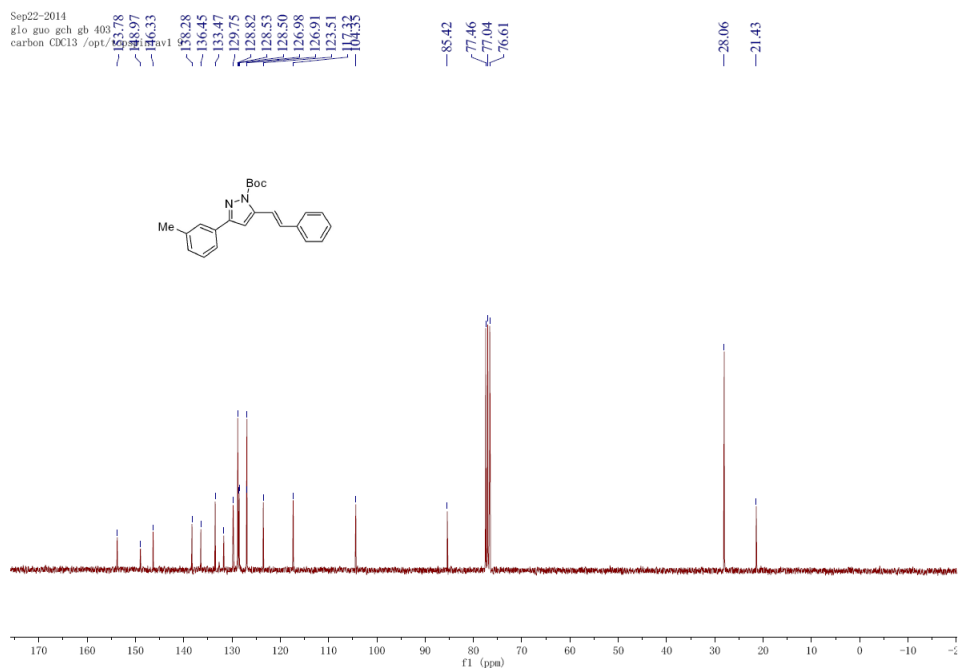

# <sup>1</sup>H NMR spectrum of **6**

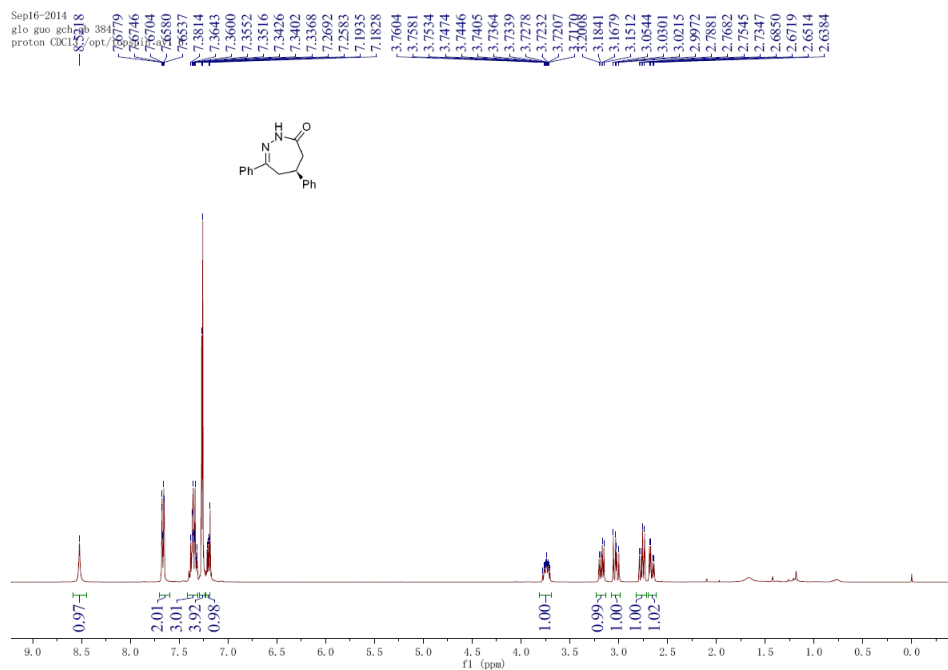

# <sup>13</sup>C NMR spectrum of **6**

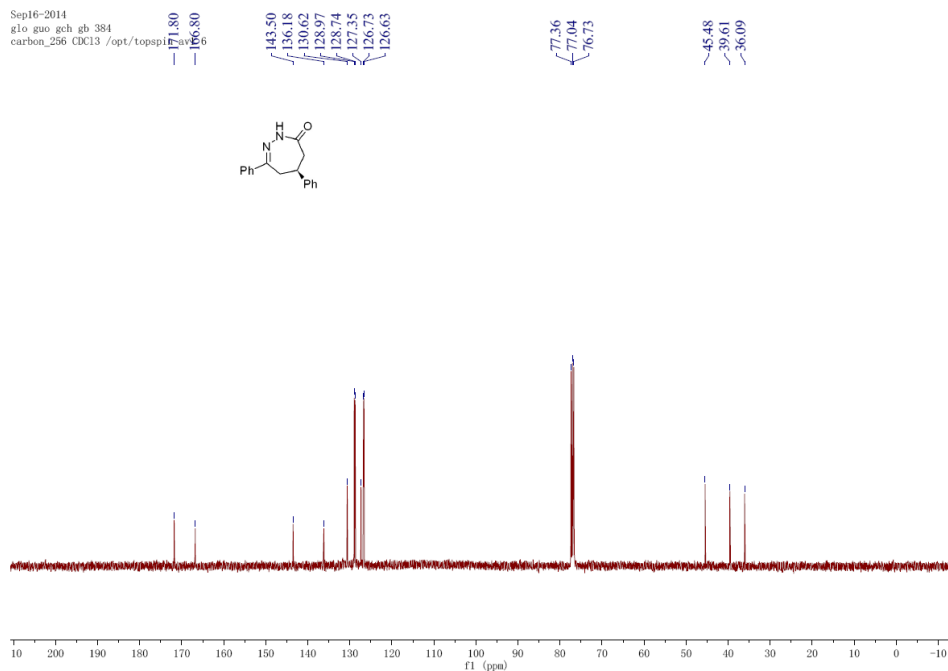

# <sup>1</sup>H NMR spectrum of **7**

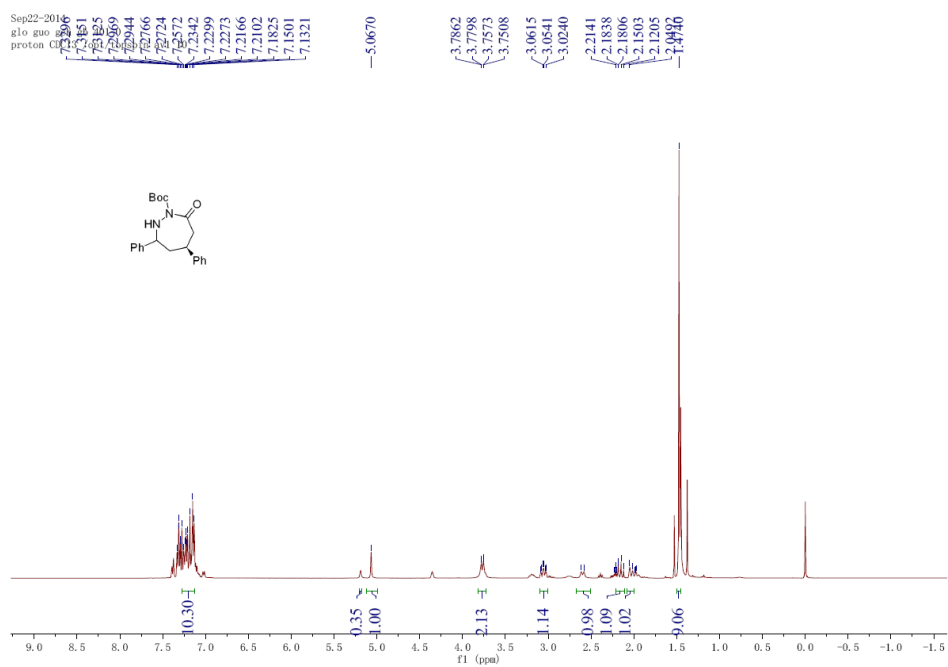

# <sup>13</sup>C NMR spectrum of **7**

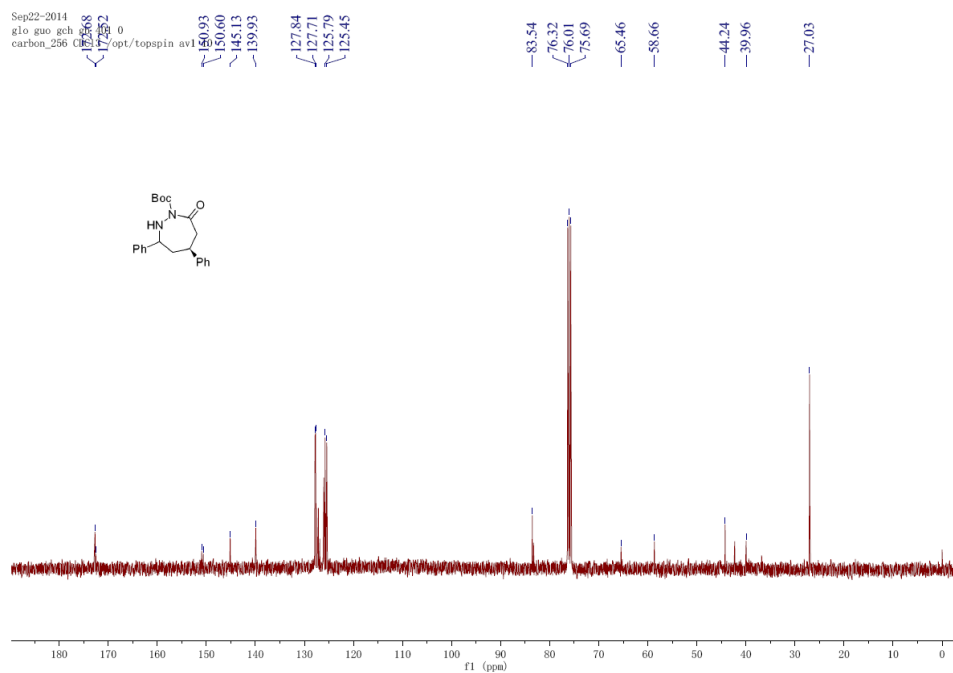

## 8. HPLC traces

### Rac-3ad

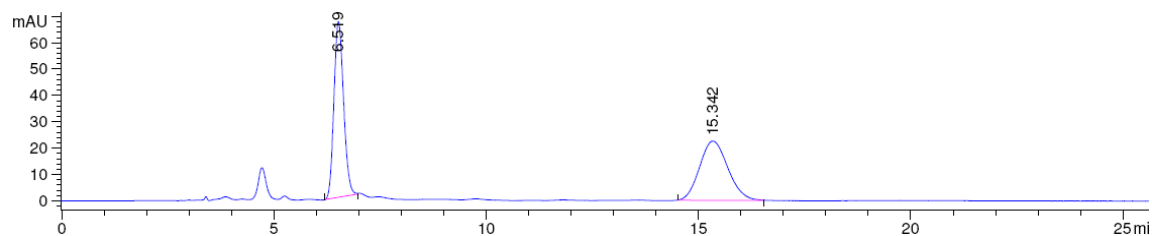

| Peak # | RetTime [min] | Type | Width [min] | Area [mAU*s] | Height [mAU] | Area %  |
|--------|---------------|------|-------------|--------------|--------------|---------|
| 1      | 6.519         | BB   | 0.2446      | 1057.58069   | 66.85200     | 50.2613 |
| 2      | 15.342        | BB   | 0.6795      | 1046.58472   | 22.54806     | 49.7387 |

Totals : 2104.16541 89.40006

### Asy-3ad

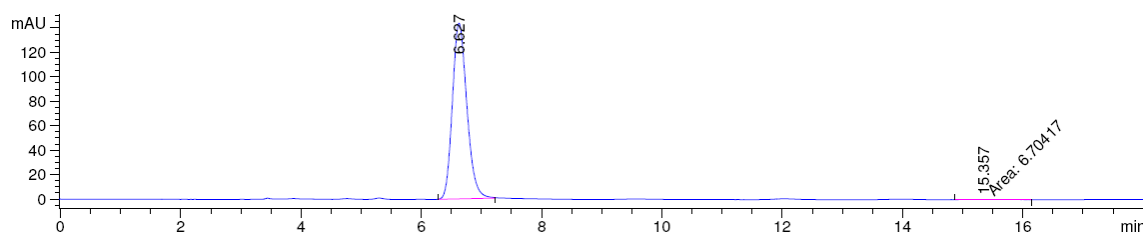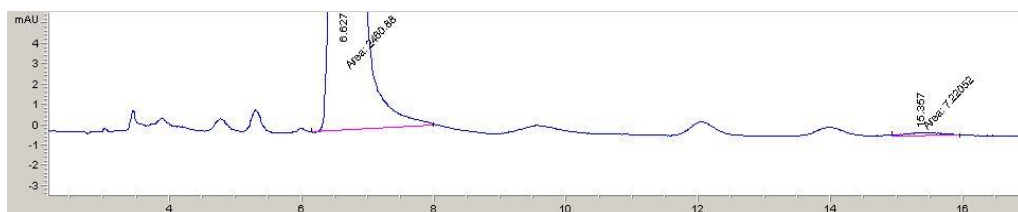

| Peak # | RetTime [min] | Type | Width [min] | Area [mAU*s] | Height [mAU] | Area %  |
|--------|---------------|------|-------------|--------------|--------------|---------|
| 1      | 6.627         | BB   | 0.2592      | 2406.00806   | 143.78796    | 99.7221 |
| 2      | 15.357        | MM   | 0.7043      | 6.70417      | 1.58648e-1   | 0.2779  |

Totals : 2412.71222 143.94661

### Rac-3bd

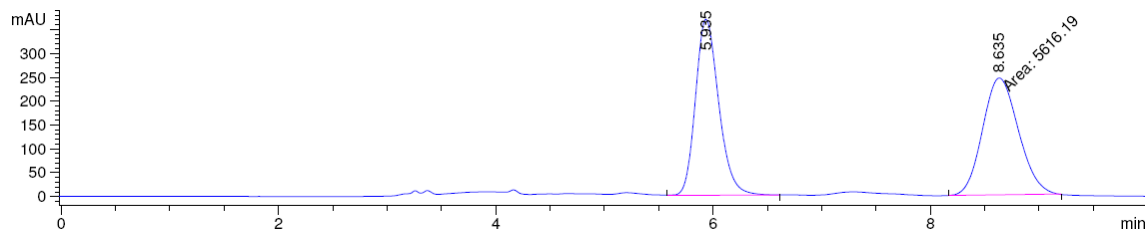

| Peak # | RetTime [min] | Type | Width [min] | Area [mAU*s] | Height [mAU] | Area %  |
|--------|---------------|------|-------------|--------------|--------------|---------|
| 1      | 5.935         | VB   | 0.2299      | 5499.33789   | 368.92136    | 49.4744 |
| 2      | 8.635         | MM   | 0.3824      | 5616.19238   | 244.80255    | 50.5256 |

Totals : 1.11155e4 613.72391

### Asy-3bd

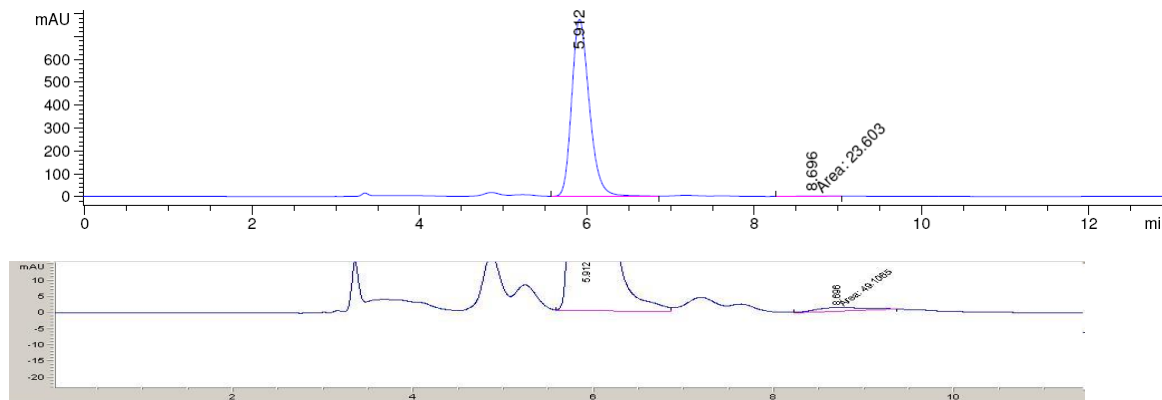

| Peak # | RetTime [min] | Type | Width [min] | Area [mAU*s] | Height [mAU] | Area %  |
|--------|---------------|------|-------------|--------------|--------------|---------|
| 1      | 5.912         | VB   | 0.2262      | 1.13650e4    | 774.56903    | 99.7927 |
| 2      | 8.696         | MM   | 0.3539      | 23.60300     | 8.16146e-1   | 0.2073  |

Totals : 1.13886e4 775.38518

### Rac-3cd

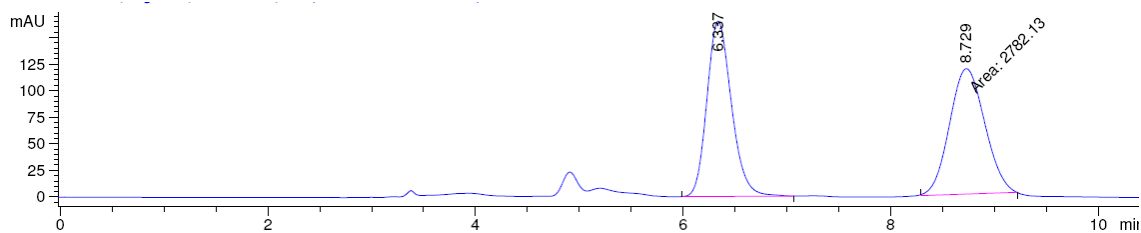

| Peak # | RetTime [min] | Type | Width [min] | Area [mAU*s] | Height [mAU] | Area %  |
|--------|---------------|------|-------------|--------------|--------------|---------|
| 1      | 6.337         | BB   | 0.2540      | 2712.96411   | 164.87769    | 49.3707 |
| 2      | 8.729         | MM   | 0.3930      | 2782.12939   | 117.97935    | 50.6293 |

Totals : 5495.09351 282.85704

### Asy-3cd

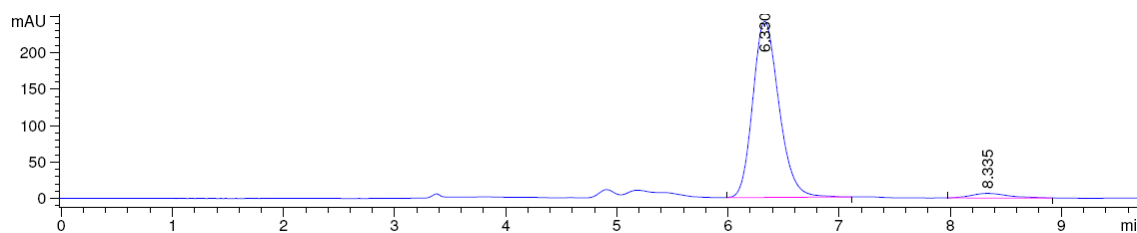

| Peak # | RetTime [min] | Type | Width [min] | Area [mAU*s] | Height [mAU] | Area %  |
|--------|---------------|------|-------------|--------------|--------------|---------|
| 1      | 6.330         | BB   | 0.2529      | 3956.56641   | 241.76892    | 96.2031 |
| 2      | 8.335         | BB   | 0.3598      | 156.15468    | 6.39752      | 3.7969  |

Totals : 4112.72108 248.16644

### Rac-3dd

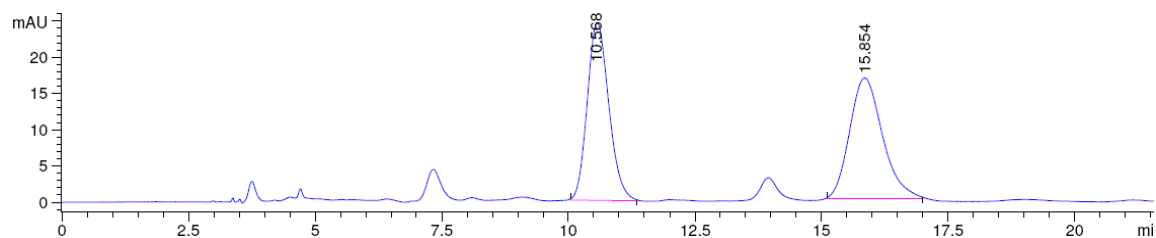

| Peak # | RetTime [min] | Type | Width [min] | Area [mAU*s] | Height [mAU] | Area %  |
|--------|---------------|------|-------------|--------------|--------------|---------|
| 1      | 10.569        | BB   | 0.4580      | 1129.25488   | 38.07580     | 49.0073 |
| 2      | 15.851        | BB   | 0.6504      | 1175.00537   | 26.19232     | 50.9927 |

Totals : 2304.26025 64.26812

### Asy-3dd

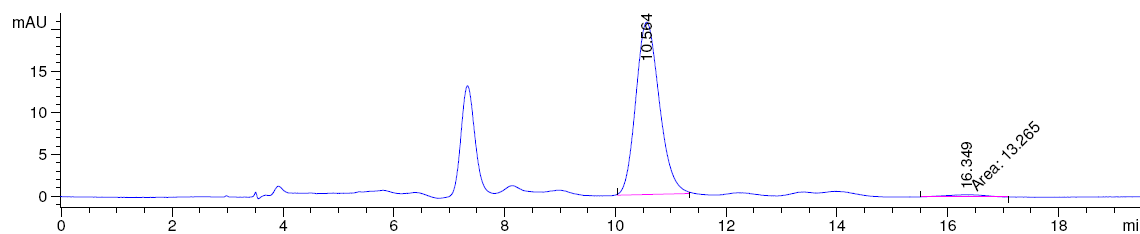

| Peak # | RetTime [min] | Type | Width [min] | Area [mAU*s] | Height [mAU] | Area %  |
|--------|---------------|------|-------------|--------------|--------------|---------|
| 1      | 10.564        | BB   | 0.4383      | 610.34760    | 20.67969     | 97.8729 |
| 2      | 16.349        | MM   | 0.8174      | 13.26503     | 2.70487e-1   | 2.1271  |

Totals : 623.61263 20.95018



### Rac-3ed

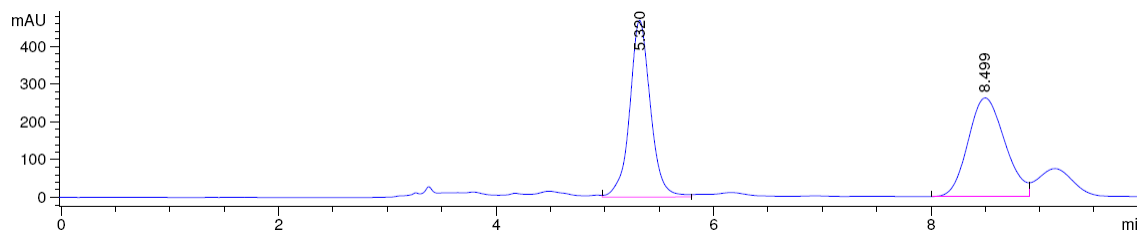

| Peak # | RetTime [min] | Type | Width [min] | Area [mAU*s] | Height [mAU] | Area %  |
|--------|---------------|------|-------------|--------------|--------------|---------|
| 1      | 5.320         | VB   | 0.2008      | 6221.42236   | 468.78500    | 50.1925 |
| 2      | 8.499         | BV   | 0.3659      | 6173.69141   | 261.97028    | 49.8075 |

Totals : 1.23951e4 730.75528

### Asy-3ed

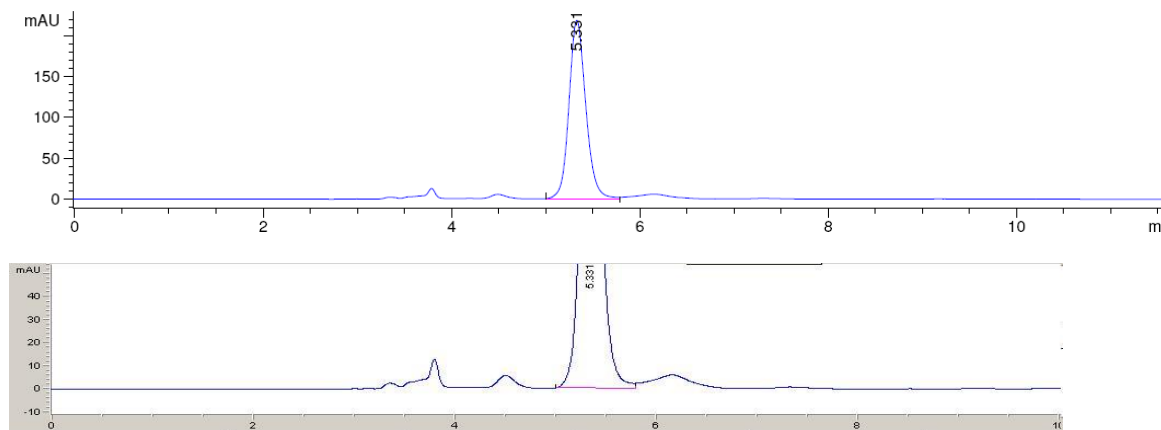

| Peak # | RetTime [min] | Type | Width [min] | Area [mAU*s] | Height [mAU] | Area %   |
|--------|---------------|------|-------------|--------------|--------------|----------|
| 1      | 5.331         | BB   | 0.1905      | 2724.83936   | 218.41327    | 100.0000 |

Totals : 2724.83936 218.41327

### Rac-3fd

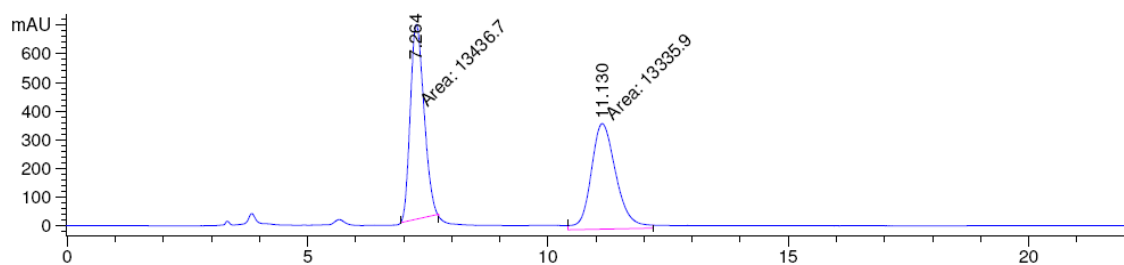

| Peak # | RetTime [min] | Type | Width [min] | Area [mAU*s] | Height [mAU] | Area %  |
|--------|---------------|------|-------------|--------------|--------------|---------|
| 1      | 7.264         | MM   | 0.3300      | 1.34367e4    | 678.67761    | 50.1882 |
| 2      | 11.130        | MM   | 0.6038      | 1.33359e4    | 368.11630    | 49.8118 |

Totals : 2.67727e4 1046.79391

### Asy-3fd

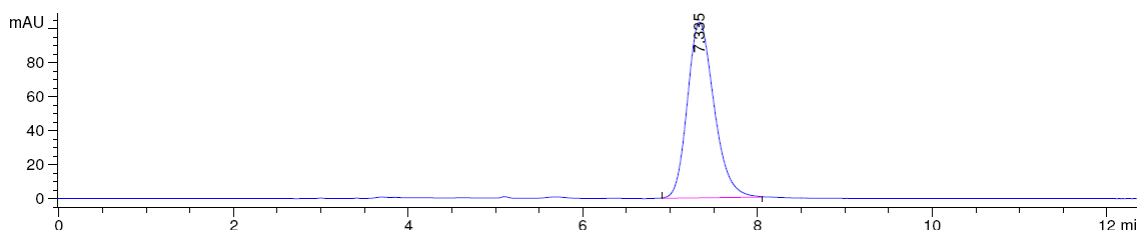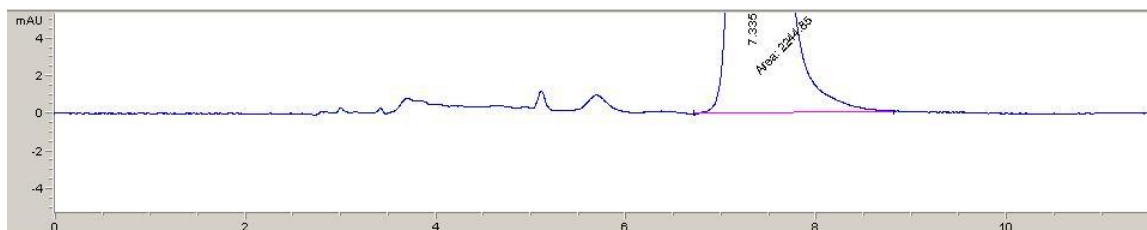

| Peak # | RetTime [min] | Type | Width [min] | Area [mAU*s] | Height [mAU] | Area %   |
|--------|---------------|------|-------------|--------------|--------------|----------|
| 1      | 7.335         | BB   | 0.3248      | 2194.75757   | 103.32362    | 100.0000 |

Totals : 2194.75757 103.32362

### Rac-3gd

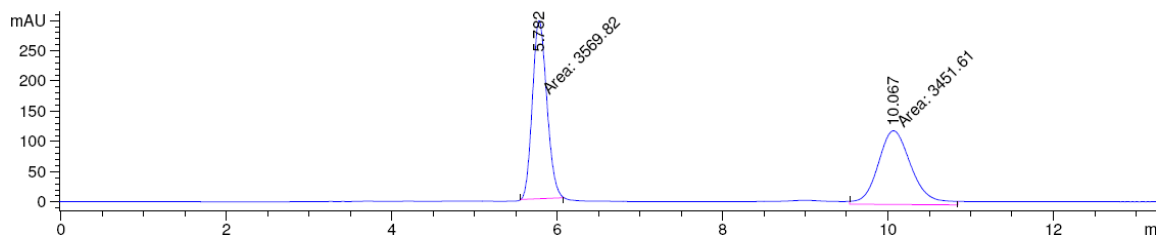

| Peak # | RetTime [min] | Type | Width [min] | Area [mAU*s] | Height [mAU] | Area %  |
|--------|---------------|------|-------------|--------------|--------------|---------|
| 1      | 5.782         | MM   | 0.2018      | 3569.81567   | 294.78189    | 50.8418 |
| 2      | 10.067        | MM   | 0.4714      | 3451.60791   | 122.02920    | 49.1582 |

Totals : 7021.42358 416.81109

### Asy-3gd

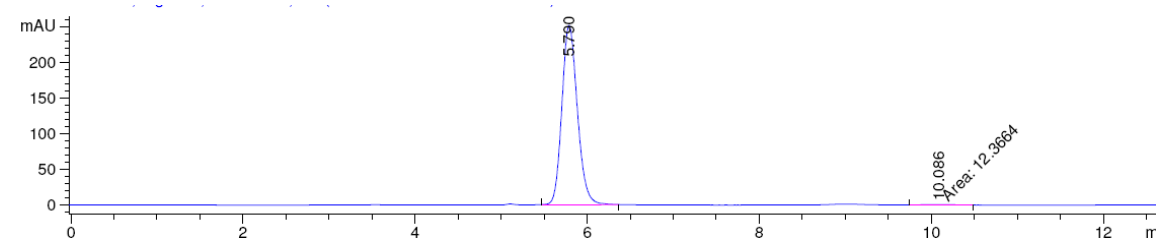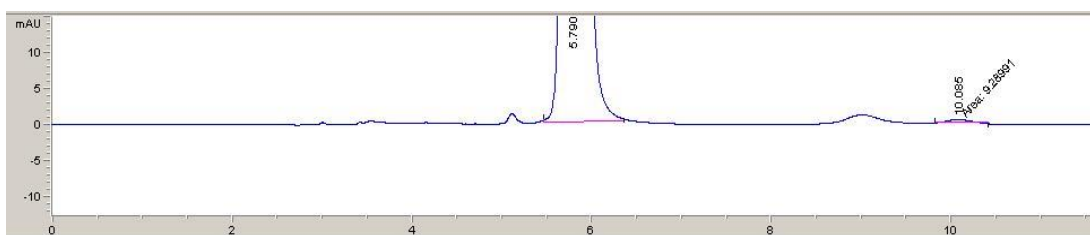

| Peak # | RetTime [min] | Type | Width [min] | Area [mAU*s] | Height [mAU] | Area %  |
|--------|---------------|------|-------------|--------------|--------------|---------|
| 1      | 5.790         | BB   | 0.1946      | 3160.44360   | 251.50658    | 99.6102 |
| 2      | 10.086        | MM   | 0.3643      | 12.36638     | 5.65741e-1   | 0.3898  |

Totals : 3172.80999 252.07232

### Rac-3hd

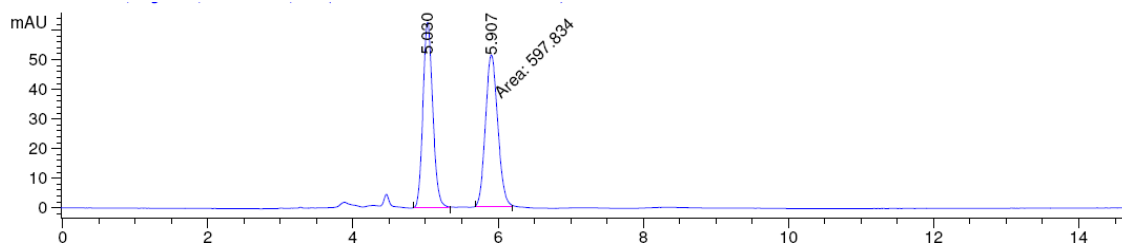

| Peak # | RetTime [min] | Type | Width [min] | Area [mAU*s] | Height [mAU] | Area %  |
|--------|---------------|------|-------------|--------------|--------------|---------|
| 1      | 5.030         | BB   | 0.1451      | 585.11322    | 62.56184     | 49.4623 |
| 2      | 5.907         | MM   | 0.1952      | 597.83429    | 51.05091     | 50.5377 |

Totals : 1182.94751 113.61274

### Asy-3hd

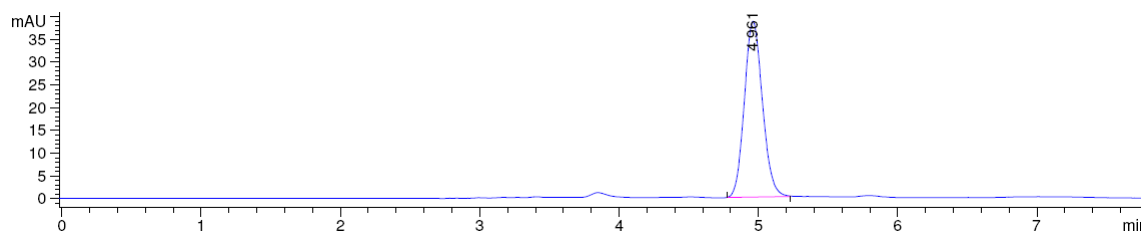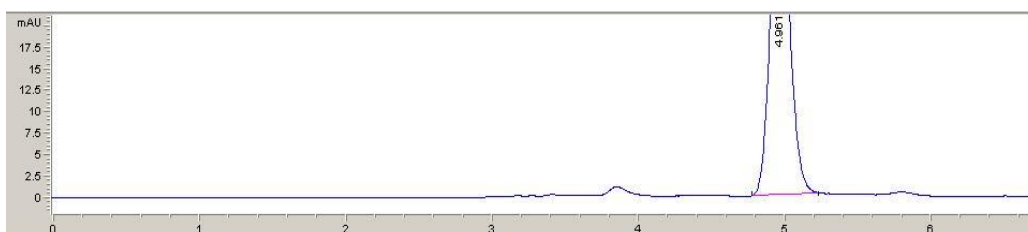

| Peak # | RetTime [min] | Type | Width [min] | Area [mAU*s] | Height [mAU] | Area %   |
|--------|---------------|------|-------------|--------------|--------------|----------|
| 1      | 4.961         | BB   | 0.1392      | 348.61063    | 38.64572     | 100.0000 |

Totals : 348.61063 38.64572

### Rac-3id

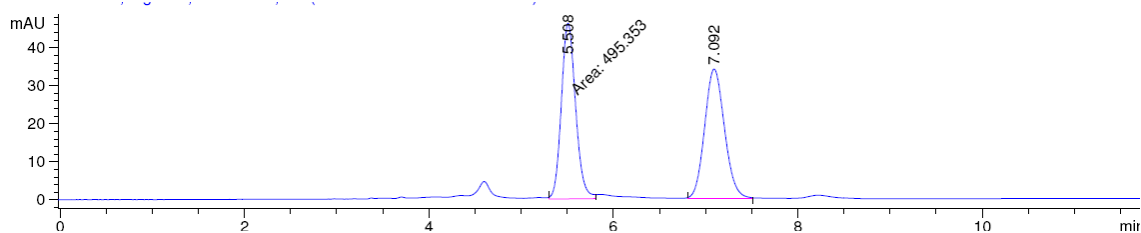

| Peak # | RetTime [min] | Type | Width [min] | Area [mAU*s] | Height [mAU] | Area %  |
|--------|---------------|------|-------------|--------------|--------------|---------|
| 1      | 5.508         | MM   | 0.1788      | 495.35330    | 46.18275     | 49.3816 |
| 2      | 7.092         | BB   | 0.2323      | 507.75891    | 33.98175     | 50.6184 |

Totals : 1003.11221 80.16451

### Asy-3id

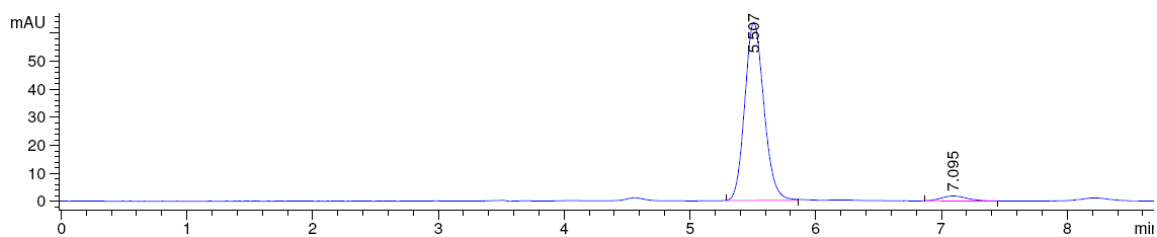

| Peak # | RetTime [min] | Type | Width [min] | Area [mAU*s] | Height [mAU] | Area %  |
|--------|---------------|------|-------------|--------------|--------------|---------|
| 1      | 5.507         | BB   | 0.1645      | 672.93549    | 63.59381     | 96.2483 |
| 2      | 7.095         | BB   | 0.1846      | 26.23054     | 1.79417      | 3.7517  |

Totals : 699.16603 65.38798

### Rac-3ae

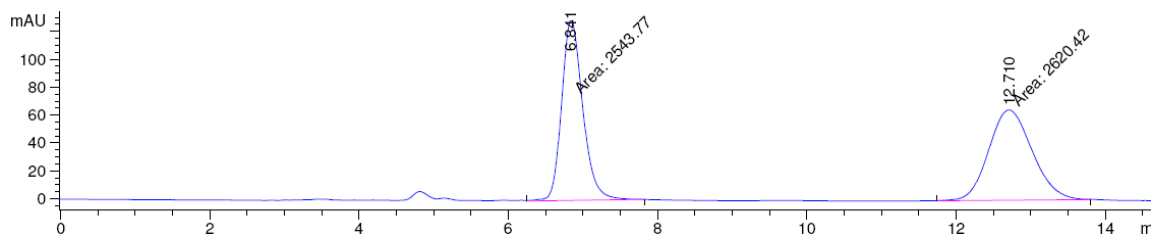

| Peak # | RetTime [min] | Type | Width [min] | Area [mAU*s] | Height [mAU] | Area %  |
|--------|---------------|------|-------------|--------------|--------------|---------|
| 1      | 6.841         | MM   | 0.3292      | 2543.76880   | 128.78394    | 49.2579 |
| 2      | 12.710        | MM   | 0.6758      | 2620.41821   | 64.62562     | 50.7421 |

Totals : 5164.18701 193.40955

### Asy-3ae

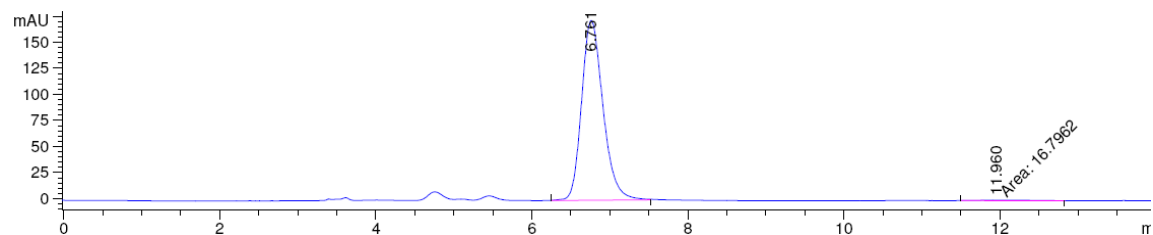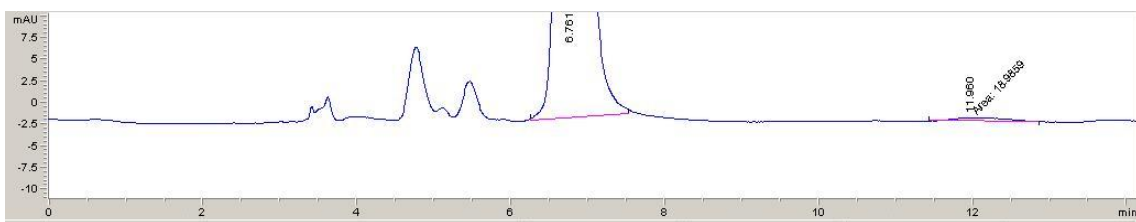

| Peak # | RetTime [min] | Type | Width [min] | Area [mAU*s] | Height [mAU] | Area %  |
|--------|---------------|------|-------------|--------------|--------------|---------|
| 1      | 6.761         | BB   | 0.2947      | 3295.54297   | 172.68240    | 99.4929 |
| 2      | 11.960        | MM   | 0.7761      | 16.79625     | 3.60699e-1   | 0.5071  |

Totals : 3312.33922 173.04310

### Rac-3af

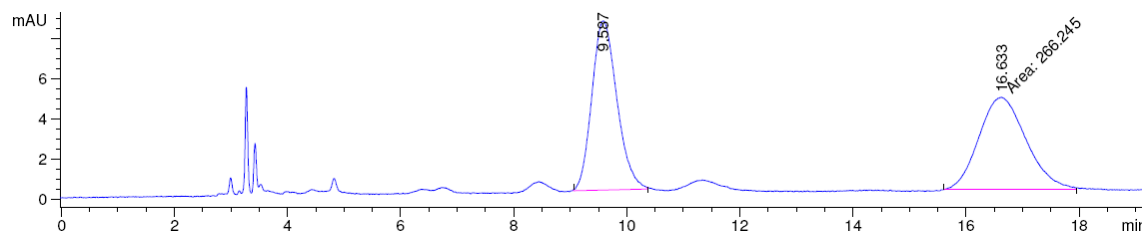

| Peak # | RetTime [min] | Type | Width [min] | Area [mAU*s] | Height [mAU] | Area %  |
|--------|---------------|------|-------------|--------------|--------------|---------|
| 1      | 9.587         | BB   | 0.3660      | 259.67239    | 8.41628      | 49.3752 |
| 2      | 16.633        | MM   | 0.9672      | 266.24475    | 4.58812      | 50.6248 |

Totals : 525.91714 13.00440

### Asy-3af

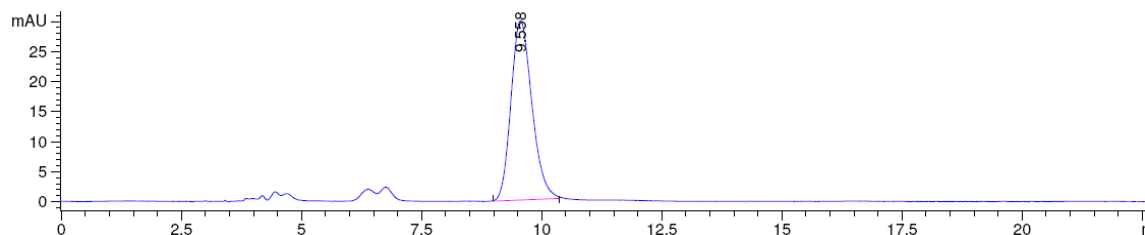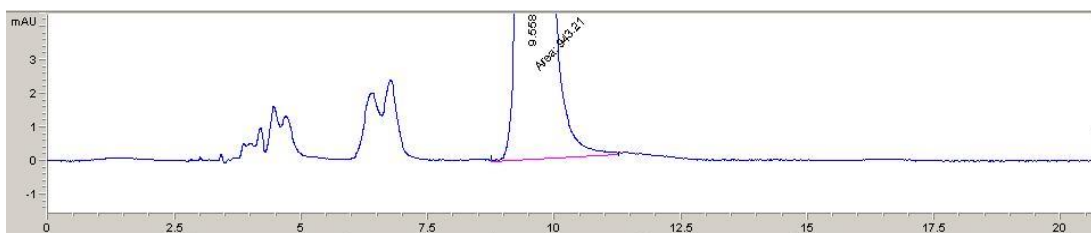

| Peak # | RetTime [min] | Type | Width [min] | Area [mAU*s] | Height [mAU] | Area %   |
|--------|---------------|------|-------------|--------------|--------------|----------|
| 1      | 9.558         | BB   | 0.4703      | 907.97192    | 29.89494     | 100.0000 |

Totals : 907.97192 29.89494

### Rac-3ag

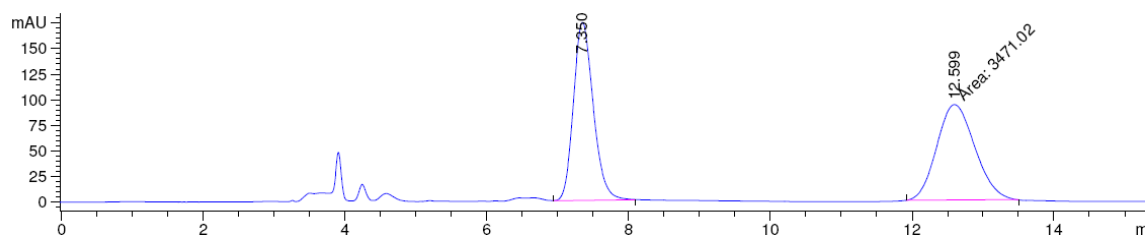

| Peak # | RetTime [min] | Type | Width [min] | Area [mAU*s] | Height [mAU] | Area %  |
|--------|---------------|------|-------------|--------------|--------------|---------|
| 1      | 7.350         | VB   | 0.3002      | 3383.93091   | 173.76974    | 49.3648 |
| 2      | 12.599        | MM   | 0.6212      | 3471.01636   | 93.12990     | 50.6352 |

Totals : 6854.94727 266.89964

### Asy-3ag

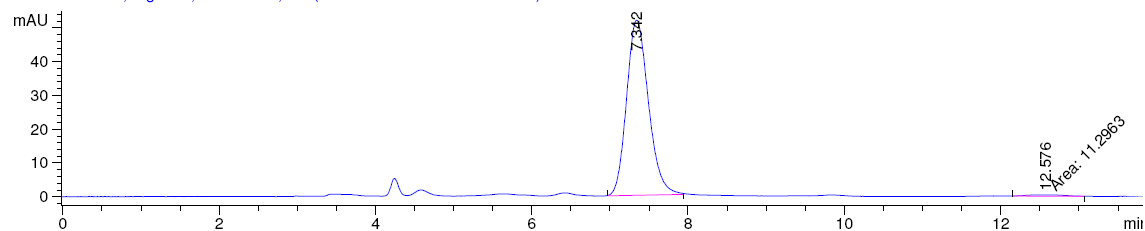

| Peak # | RetTime [min] | Type | Width [min] | Area [mAU*s] | Height [mAU] | Area %  |
|--------|---------------|------|-------------|--------------|--------------|---------|
| 1      | 7.342         | BB   | 0.2992      | 1010.32361   | 51.87300     | 98.8943 |
| 2      | 12.576        | MM   | 0.4747      | 11.29630     | 3.96644e-1   | 1.1057  |

Totals : 1021.61991 52.26964



### Rac-3ah

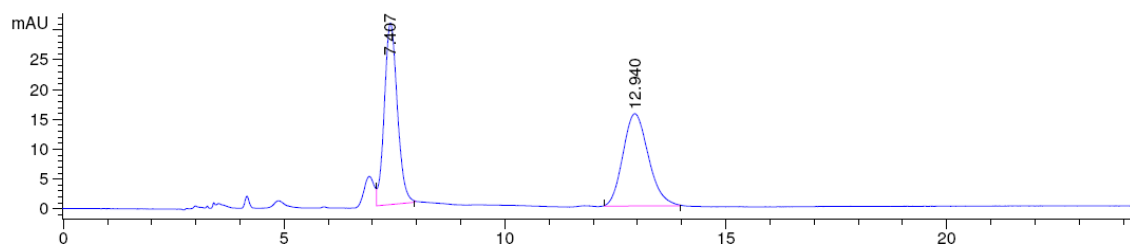

| Peak # | RetTime [min] | Type | Width [min] | Area [mAU*s] | Height [mAU] | Area %  |
|--------|---------------|------|-------------|--------------|--------------|---------|
| 1      | 7.407         | VB   | 0.3139      | 624.24194    | 30.48642     | 50.0897 |
| 2      | 12.940        | BB   | 0.6065      | 622.00671    | 15.48974     | 49.9103 |

Totals : 1246.24866 45.97616

### Asy-3ah

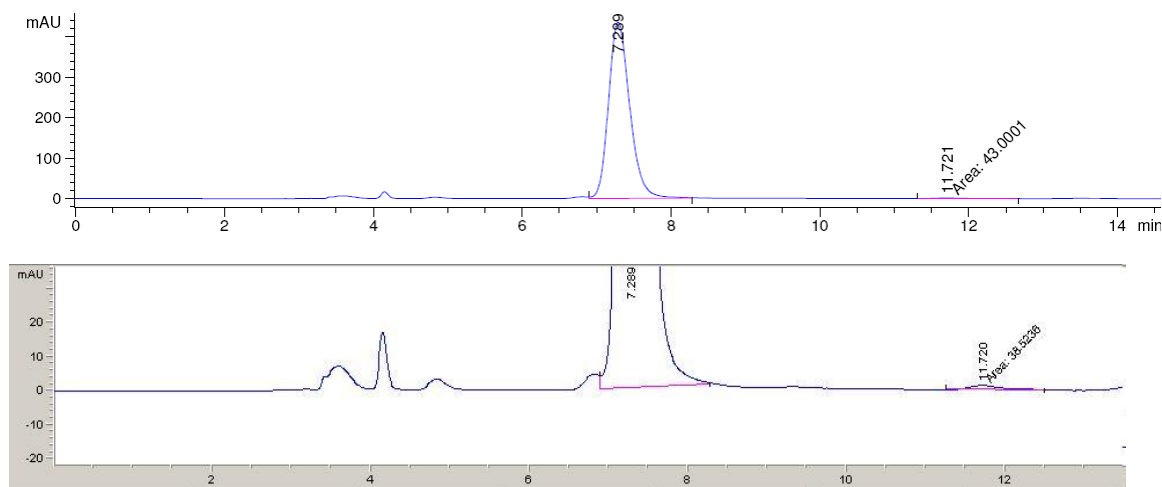

| Peak # | RetTime [min] | Type | Width [min] | Area [mAU*s] | Height [mAU] | Area %  |
|--------|---------------|------|-------------|--------------|--------------|---------|
| 1      | 7.289         | VB   | 0.3052      | 8630.07617   | 435.42636    | 99.5042 |
| 2      | 11.721        | MM   | 0.5410      | 43.00012     | 1.32483      | 0.4958  |

Totals : 8673.07629 436.75119

### Rac-3ai

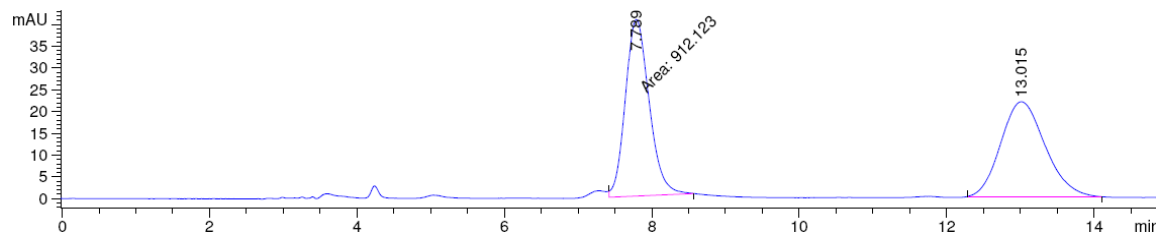

| Peak # | RetTime [min] | Type | Width [min] | Area [mAU*s] | Height [mAU] | Area %  |
|--------|---------------|------|-------------|--------------|--------------|---------|
| 1      | 7.789         | MM   | 0.3745      | 912.12292    | 40.59372     | 49.7293 |
| 2      | 13.015        | BB   | 0.6289      | 922.05469    | 21.91245     | 50.2707 |

Totals : 1834.17761 62.50617

### Asy-3ai

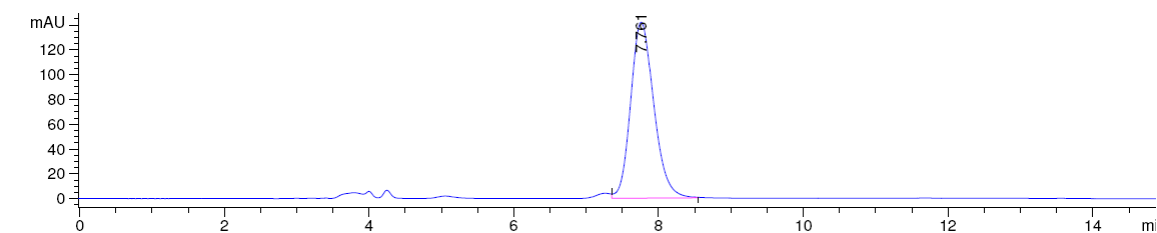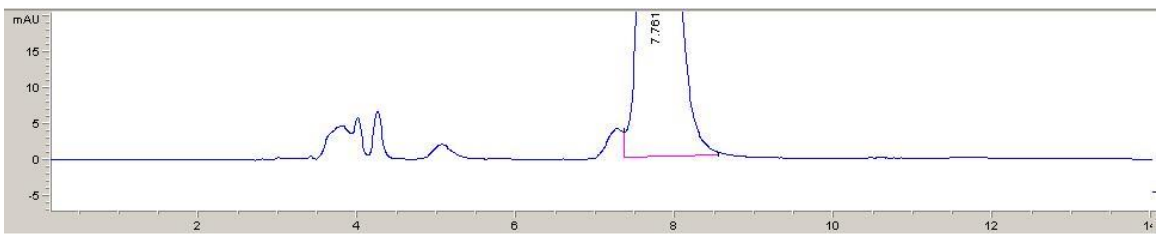

| Peak # | RetTime [min] | Type | Width [min] | Area [mAU*s] | Height [mAU] | Area %   |
|--------|---------------|------|-------------|--------------|--------------|----------|
| 1      | 7.761         | VB   | 0.3435      | 3154.67432   | 141.84454    | 100.0000 |

Totals : 3154.67432 141.84454

### Rac-3aj

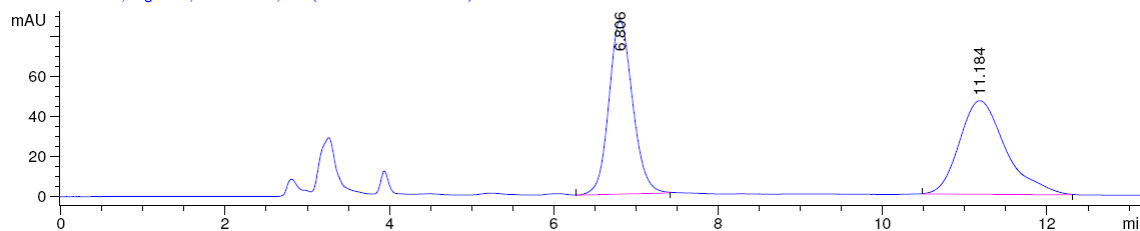

| Peak # | RetTime [min] | Type | Width [min] | Area [mAU*s] | Height [mAU] | Area %  |
|--------|---------------|------|-------------|--------------|--------------|---------|
| 1      | 6.806         | BB   | 0.3083      | 1938.12451   | 97.32986     | 49.1794 |
| 2      | 11.185        | BB   | 0.5730      | 2002.80701   | 52.97967     | 50.8206 |

Totals : 3940.93152 150.30952

### Asy-3aj

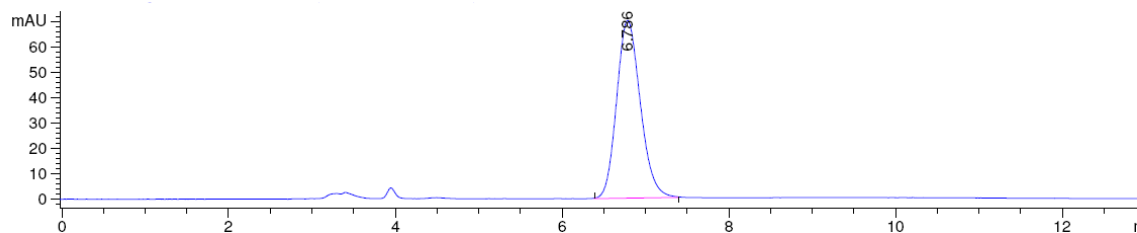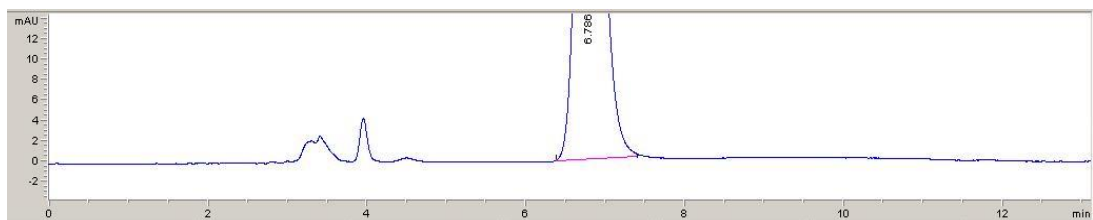

| Peak # | RetTime [min] | Type | Width [min] | Area [mAU*s] | Height [mAU] | Area %   |
|--------|---------------|------|-------------|--------------|--------------|----------|
| 1      | 6.786         | BB   | 0.3045      | 1386.40991   | 70.17199     | 100.0000 |

Totals : 1386.40991 70.17199

### Rac-3ak

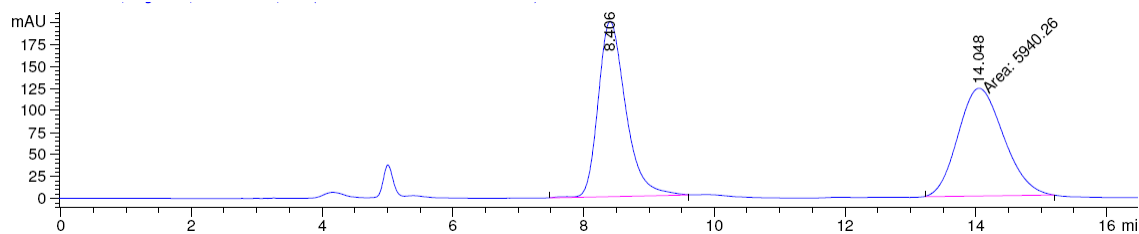

| Peak # | RetTime [min] | Type | Width [min] | Area [mAU*s] | Height [mAU] | Area %  |
|--------|---------------|------|-------------|--------------|--------------|---------|
| 1      | 8.406         | BB   | 0.4453      | 5828.34326   | 199.20988    | 49.5245 |
| 2      | 14.048        | MM   | 0.8089      | 5940.26416   | 122.39760    | 50.4755 |

Totals : 1.17686e4 321.60748

### Asy-3ak

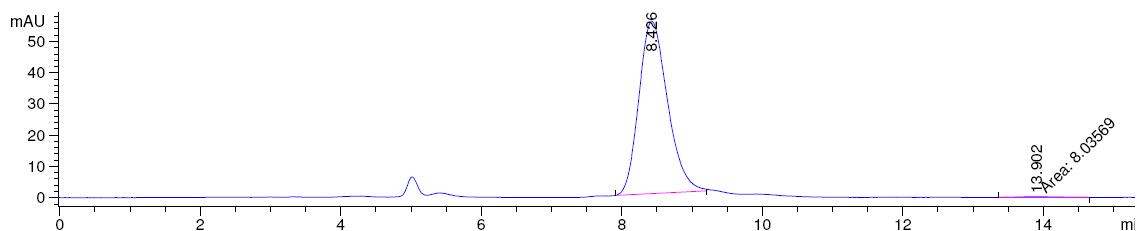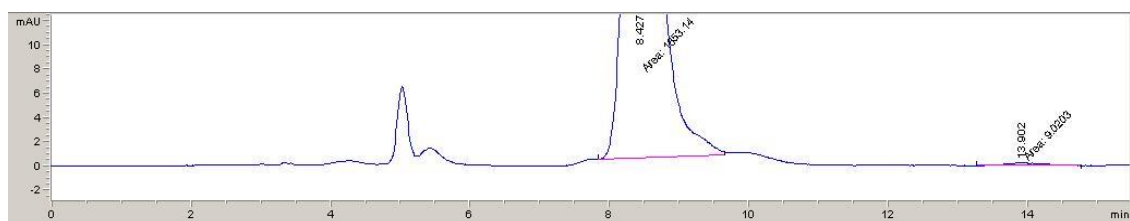

| Peak # | RetTime [min] | Type | Width [min] | Area [mAU*s] | Height [mAU] | Area %  |
|--------|---------------|------|-------------|--------------|--------------|---------|
| 1      | 8.426         | BB   | 0.4339      | 1563.86292   | 55.13797     | 99.4888 |
| 2      | 13.902        | MM   | 0.6622      | 8.03569      | 2.02237e-1   | 0.5112  |

Totals : 1571.89860 55.34020

# Rac-3al

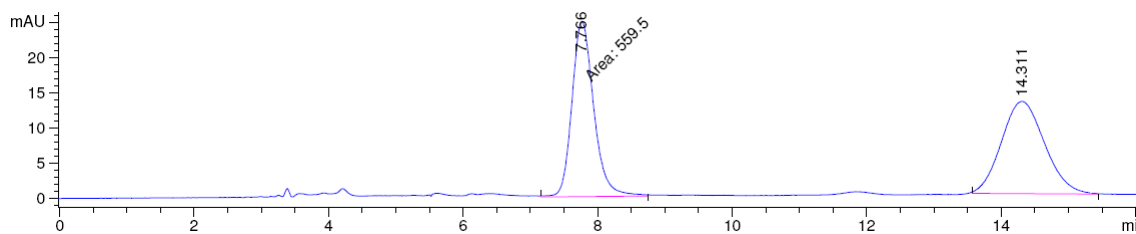

| Peak # | RetTime [min] | Type | Width [min] | Area [mAU*s] | Height [mAU] | Area %  |
|--------|---------------|------|-------------|--------------|--------------|---------|
| 1      | 7.766         | MM   | 0.3754      | 559.49969    | 24.84038     | 49.0382 |
| 2      | 14.311        | BB   | 0.5671      | 581.44635    | 13.04160     | 50.9618 |

Totals : 1140.94604 37.88198

# Asy-3al

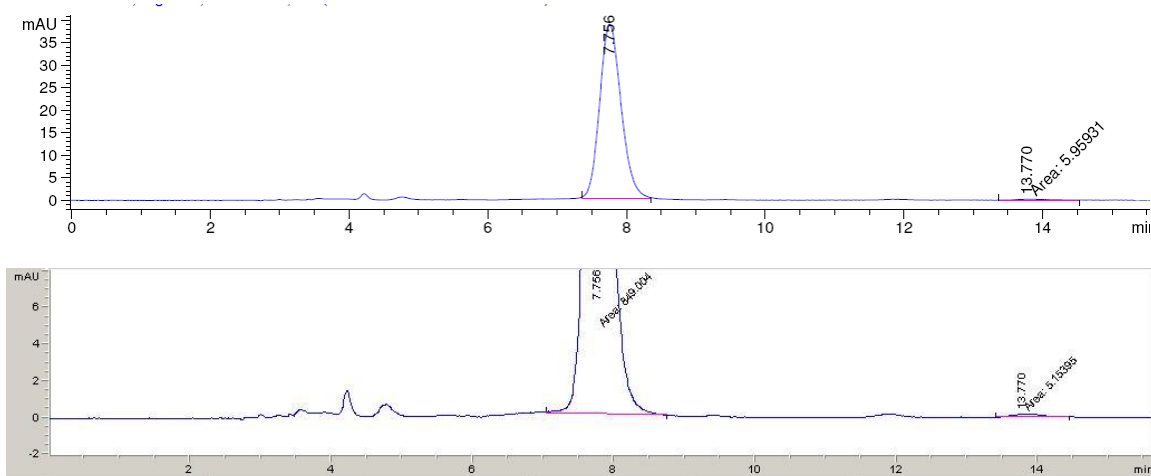

| Peak # | RetTime [min] | Type | Width [min] | Area [mAU*s] | Height [mAU] | Area %  |
|--------|---------------|------|-------------|--------------|--------------|---------|
| 1      | 7.756         | BB   | 0.3312      | 830.96478    | 38.74724     | 99.2880 |
| 2      | 13.770        | MM   | 0.5221      | 5.95931      | 1.90237e-1   | 0.7120  |

Totals : 836.92410 38.93748

### Rac-3am

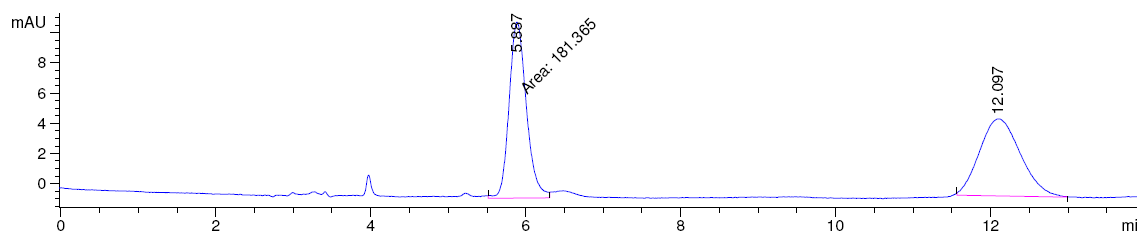

| Peak # | RetTime [min] | Type | Width [min] | Area [mAU*s] | Height [mAU] | Area %  |
|--------|---------------|------|-------------|--------------|--------------|---------|
| 1      | 5.887         | MM   | 0.2588      | 181.36459    | 11.67959     | 49.1788 |
| 2      | 12.097        | BB   | 0.4356      | 187.42157    | 5.11334      | 50.8212 |

Totals : 368.78616 16.79293

### Asy-3am

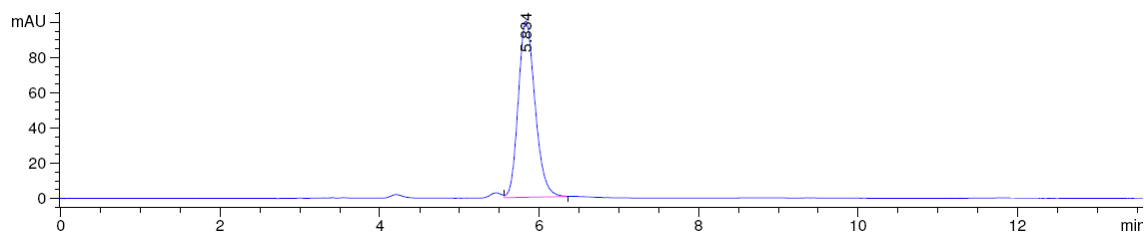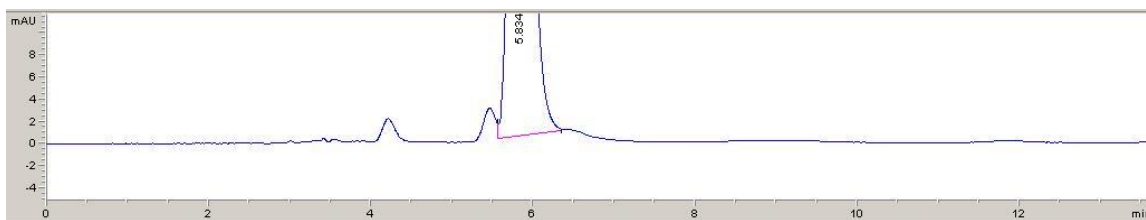

| Peak # | RetTime [min] | Type | Width [min] | Area [mAU*s] | Height [mAU] | Area %   |
|--------|---------------|------|-------------|--------------|--------------|----------|
| 1      | 5.834         | VB   | 0.2263      | 1467.37708   | 99.93972     | 100.0000 |

Totals : 1467.37708 99.93972

### Rac-3an

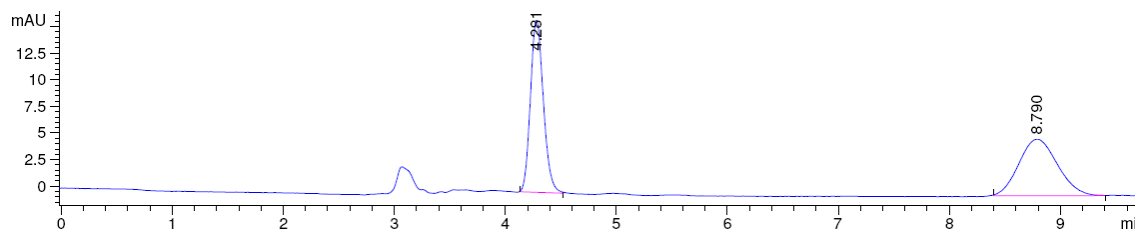

| Peak # | RetTime [min] | Type | Width [min] | Area [mAU*s] | Height [mAU] | Area %  |
|--------|---------------|------|-------------|--------------|--------------|---------|
| 1      | 4.281         | BB   | 0.1245      | 131.00998    | 16.18060     | 50.5374 |
| 2      | 8.790         | BB   | 0.3724      | 128.22386    | 5.31565      | 49.4626 |

Totals : 259.23384 21.49626

### Asy-3an

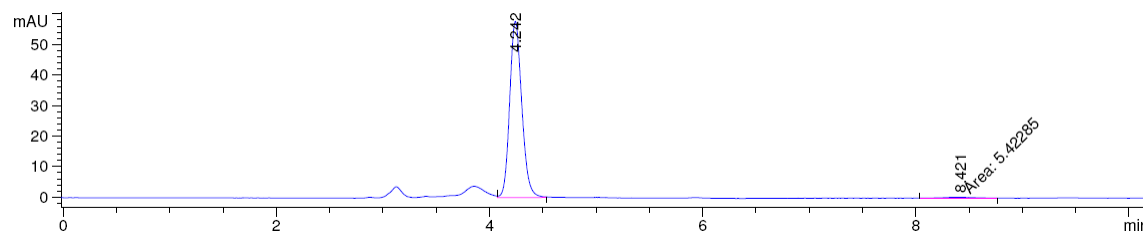

| Peak # | RetTime [min] | Type | Width [min] | Area [mAU*s] | Height [mAU] | Area %  |
|--------|---------------|------|-------------|--------------|--------------|---------|
| 1      | 4.242         | VB   | 0.1211      | 455.86874    | 57.77176     | 98.8244 |
| 2      | 8.421         | MM   | 0.3636      | 5.42285      | 2.48561e-1   | 1.1756  |

Totals : 461.29160 58.02032

### Rac-3ao

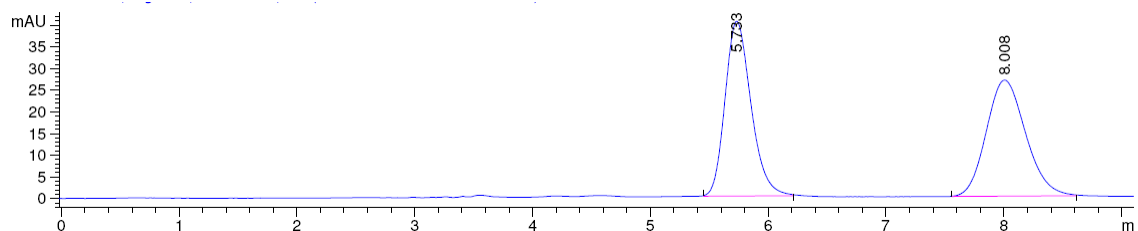

| Peak #   | RetTime [min] | Type | Width [min] | Area [mAU*s] | Height [mAU] | Area %  |
|----------|---------------|------|-------------|--------------|--------------|---------|
| 1        | 5.733         | BB   | 0.2357      | 617.60510    | 40.32320     | 49.8664 |
| 2        | 8.008         | BB   | 0.3566      | 620.91364    | 26.76661     | 50.1336 |
| Totals : |               |      |             | 1238.51874   | 67.08981     |         |

### Asy-3ao

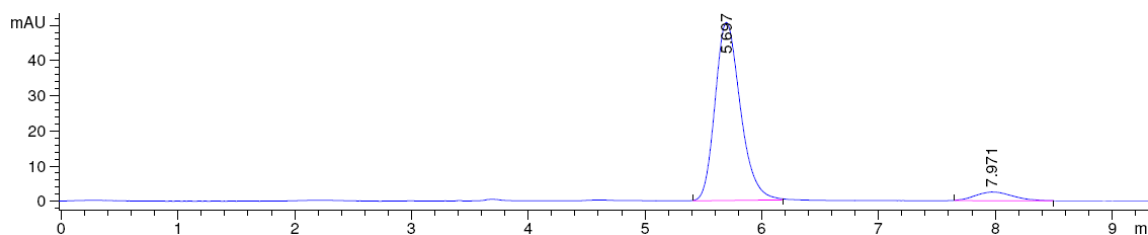

| Peak #   | RetTime [min] | Type | Width [min] | Area [mAU*s] | Height [mAU] | Area %  |
|----------|---------------|------|-------------|--------------|--------------|---------|
| 1        | 5.697         | BB   | 0.2317      | 762.00671    | 50.60434     | 93.2208 |
| 2        | 7.971         | BB   | 0.2699      | 55.41455     | 2.48703      | 6.7792  |
| Totals : |               |      |             | 817.42127    | 53.09137     |         |



### Rac-3ap

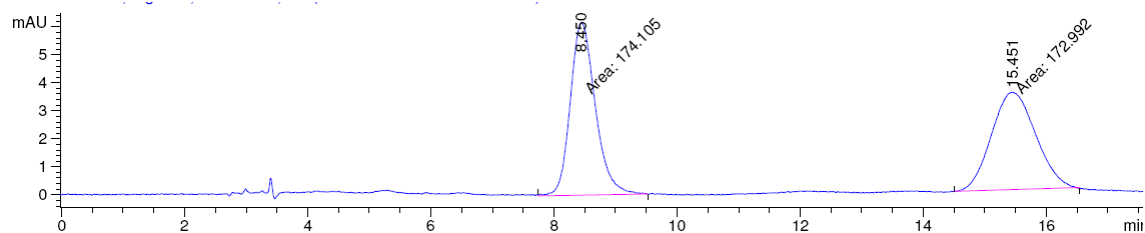

| Peak # | RetTime [min] | Type | Width [min] | Area [mAU*s] | Height [mAU] | Area %  |
|--------|---------------|------|-------------|--------------|--------------|---------|
| 1      | 8.450         | MM   | 0.4699      | 174.10521    | 6.17553      | 50.1604 |
| 2      | 15.451        | MM   | 0.8290      | 172.99203    | 3.47783      | 49.8396 |

Totals : 347.09724 9.65336

### Asy-3ap

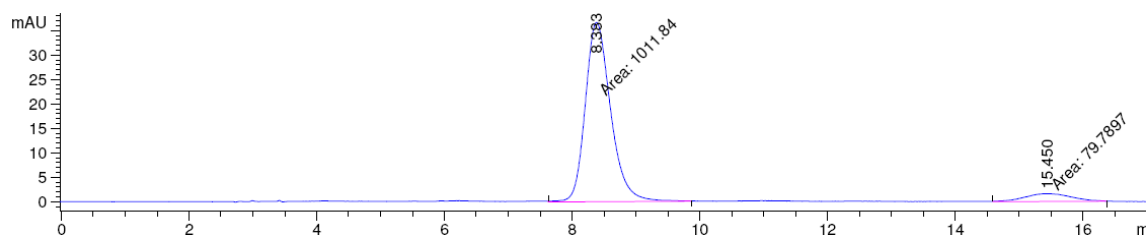

| Peak # | RetTime [min] | Type | Width [min] | Area [mAU*s] | Height [mAU] | Area %  |
|--------|---------------|------|-------------|--------------|--------------|---------|
| 1      | 8.383         | MM   | 0.4597      | 1011.84161   | 36.68555     | 92.6908 |
| 2      | 15.450        | MM   | 0.8265      | 79.78970     | 1.60906      | 7.3092  |

Totals : 1091.63132 38.29461

# Rac-6

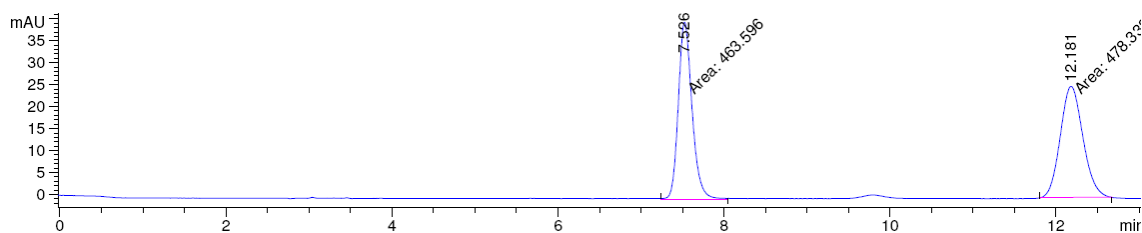

| Peak # | RetTime [min] | Type | Width [min] | Area [mAU*s] | Height [mAU] | Area %  |
|--------|---------------|------|-------------|--------------|--------------|---------|
| 1      | 7.526         | MM   | 0.1916      | 463.59552    | 40.32530     | 49.2174 |
| 2      | 12.181        | MM   | 0.3150      | 478.33774    | 25.30543     | 50.7826 |

Totals : 941.93326 65.63072

# Asy-6

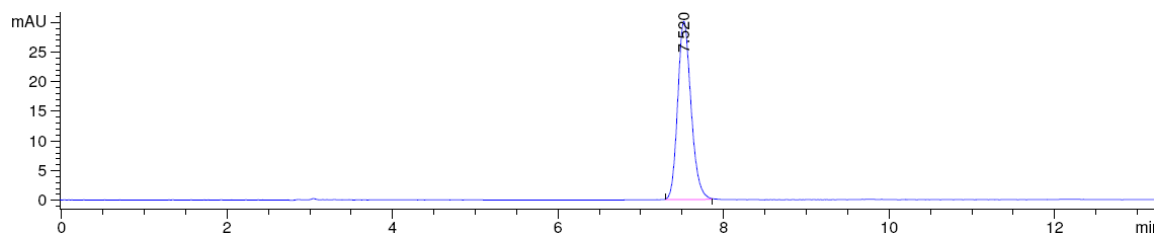

| Peak # | RetTime [min] | Type | Width [min] | Area [mAU*s] | Height [mAU] | Area %   |
|--------|---------------|------|-------------|--------------|--------------|----------|
| 1      | 7.520         | BB   | 0.1712      | 338.57968    | 30.11347     | 100.0000 |

Totals : 338.57968 30.11347

# Rac-7

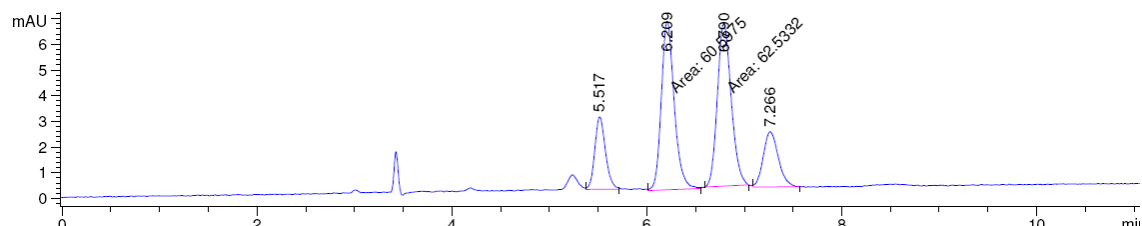

| Peak # | RetTime [min] | Type | Width [min] | Area [mAU*s] | Height [mAU] | Area %  |
|--------|---------------|------|-------------|--------------|--------------|---------|
| 1      | 5.517         | VB   | 0.1182      | 21.56606     | 2.82091      | 12.8487 |
| 2      | 6.209         | MM   | 0.1539      | 60.59749     | 6.56138      | 36.1029 |
| 3      | 6.790         | MM   | 0.1649      | 62.53324     | 6.32142      | 37.2562 |
| 4      | 7.266         | BB   | 0.1624      | 23.14977     | 2.15295      | 13.7922 |

Totals : 167.84656 17.85665

# Asy-7

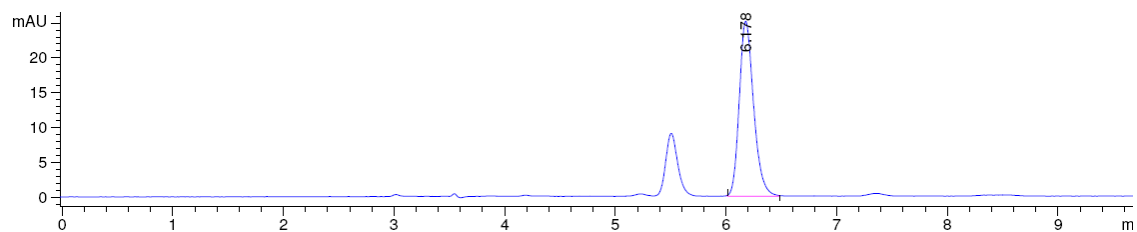

| Peak # | RetTime [min] | Type | Width [min] | Area [mAU*s] | Height [mAU] | Area %   |
|--------|---------------|------|-------------|--------------|--------------|----------|
| 1      | 6.178         | BB   | 0.1382      | 226.54669    | 25.13174     | 100.0000 |

Totals : 226.54669 25.13174
